# Supplementary material for: Straightforward Access to Enantioenriched cis-3-Fluoro-dihydroquinolin-4-ols Derivatives via Ru(II)-Catalyzed-Asymmetric Transfer Hydrogenation/Dynamic Kinetic Resolution
Source: MDPI journal article supplement (doi:10.3390/molecules27030995), 2022-02-01

## SUPPORTING INFORMATION

### **Straightforward Access to Enantioenriched *cis*-3-Fluoro-Dihydroquinolin-4-ols Derivatives *via* Ru(II)-Catalyzed-Asymmetric Transfer Hydrogenation/Dynamic Kinetic Resolution**

Ricardo Molina Betancourt, Phannarath Phansavath\* and Virginie Ratovelomanana-Vidal\*

*PSL University, Chimie ParisTech, CNRS, Institute of Chemistry for Life and Health Sciences, CSB2D team, 75005 Paris, France*

*E-mail: [phannarath.phansavath@chimieparistech.psl.eu](mailto:phannarath.phansavath@chimieparistech.psl.eu); [virginie.vidal@chimieparistech.psl.eu](mailto:virginie.vidal@chimieparistech.psl.eu)*

## Contents

|                               |           |
|-------------------------------|-----------|
| <b>1) General information</b> | <b>1</b>  |
| <b>2) NMR spectra</b>         | <b>2</b>  |
| <b>3) SFC spectra</b>         | <b>46</b> |

### **1) General Information**

All air and/or water sensitive reactions were carried out under an argon atmosphere. THF, CH<sub>2</sub>Cl<sub>2</sub> and toluene were dried over alumina columns in a solvent purification apparatus (Innovative technology). Methanol, isopropanol, chlorobenzene, trifluoromethylbenzene, ethyl acetate and acetonitrile from Sigma-Aldrich were used without further purification. Hexafluoroisopropanol (HFIP) was purchased from TCI and was used without further purification. Formic acid/triethylamine (1:1) mixture was purchased from Fluka or Alfa Aesar and was used without further purification. Reactions were monitored by thin layer chromatography carried out on precoated silica gel plates (Merck 60F254) and revealed with either an ultra-violet lamp ( $\lambda = 254$  nm) or a potassium permanganate solution. Proton nuclear magnetic resonance (<sup>1</sup>H NMR) spectra were recorded using a Bruker AC 400 (400 MHz). The chemical shifts are expressed in parts per million (ppm) referenced to residual chloroform (7.26 ppm). Data are reported as follows: chemical shifts ( $\delta$ ), multiplicity (recorded as s, singlet; d, doublet; t, triplet; q, quadruplet; quint, quintuplet; sext, sextuplet; hept, heptuplet; m, multiplet and br, broad), coupling constants and integration. Carbon-13 nuclear magnetic resonance (<sup>13</sup>C NMR) spectra were recorded using a Bruker AC 400 (101 MHz). The chemical shifts are expressed in parts per million (ppm) relative to the centre line of the triplet at 77.16 ppm for CDCl<sub>3</sub>. Melting points (m. p.) were determined on a K f ler melting point apparatus. Optical rotations were measured on a Jasco P-1010 polarimeter. High resolution mass spectrometric (HRMS) analyses were measured on LTQ-Orbitrap (Thermo Fisher Scientific) at Sorbonne Universit .

## 2) NMR Spectra

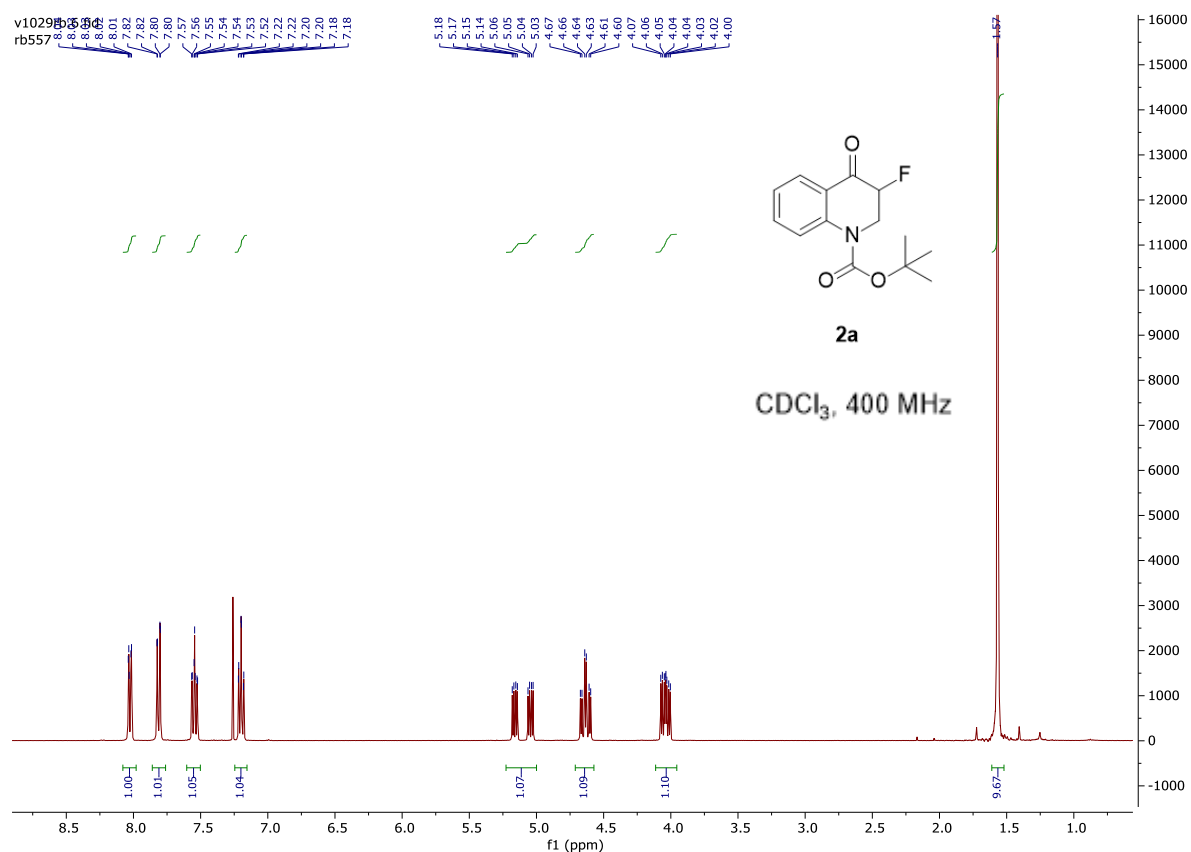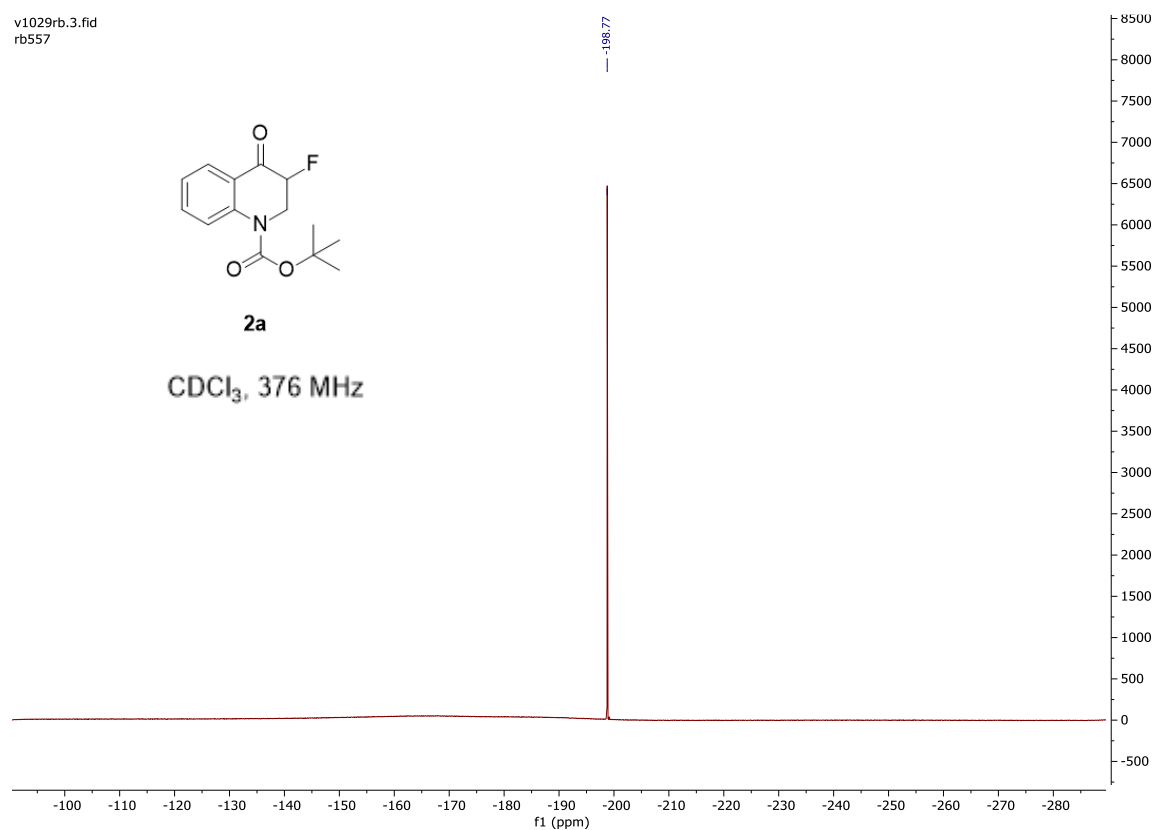

v1029rb.4.fid  
rb557

189.69  
188.55

152.77

144.06

135.00

128.08

124.61

123.85

123.19

88.10

86.21

83.19

48.76

48.49

28.34

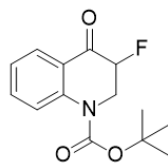

**2a**

CDCl<sub>3</sub>, 101 MHz

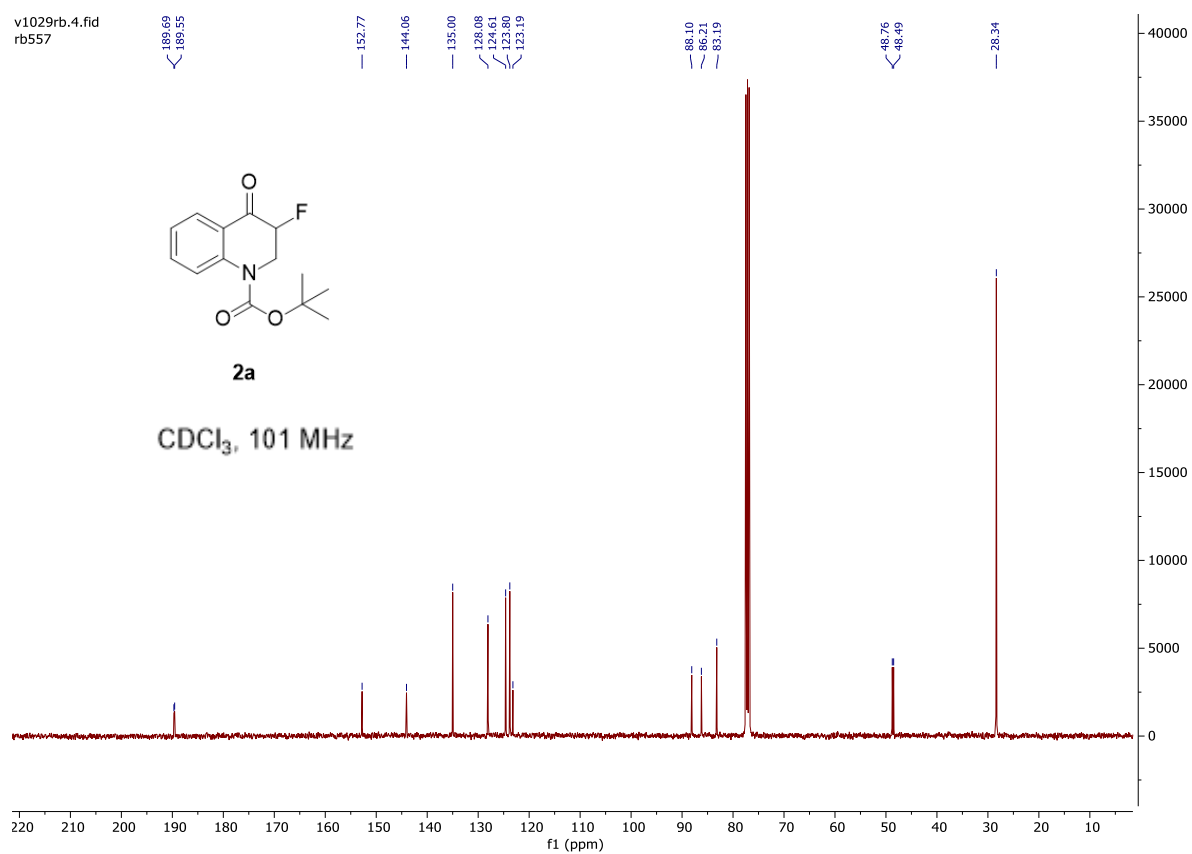

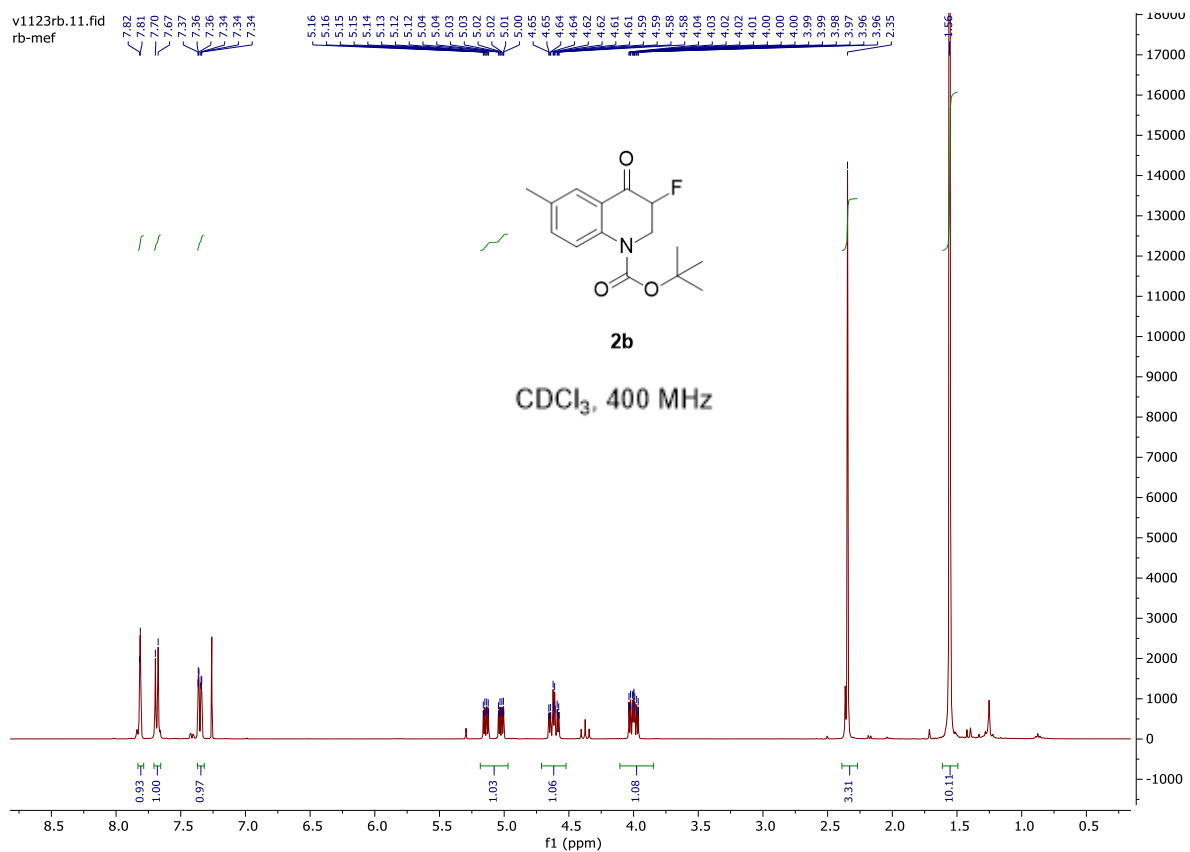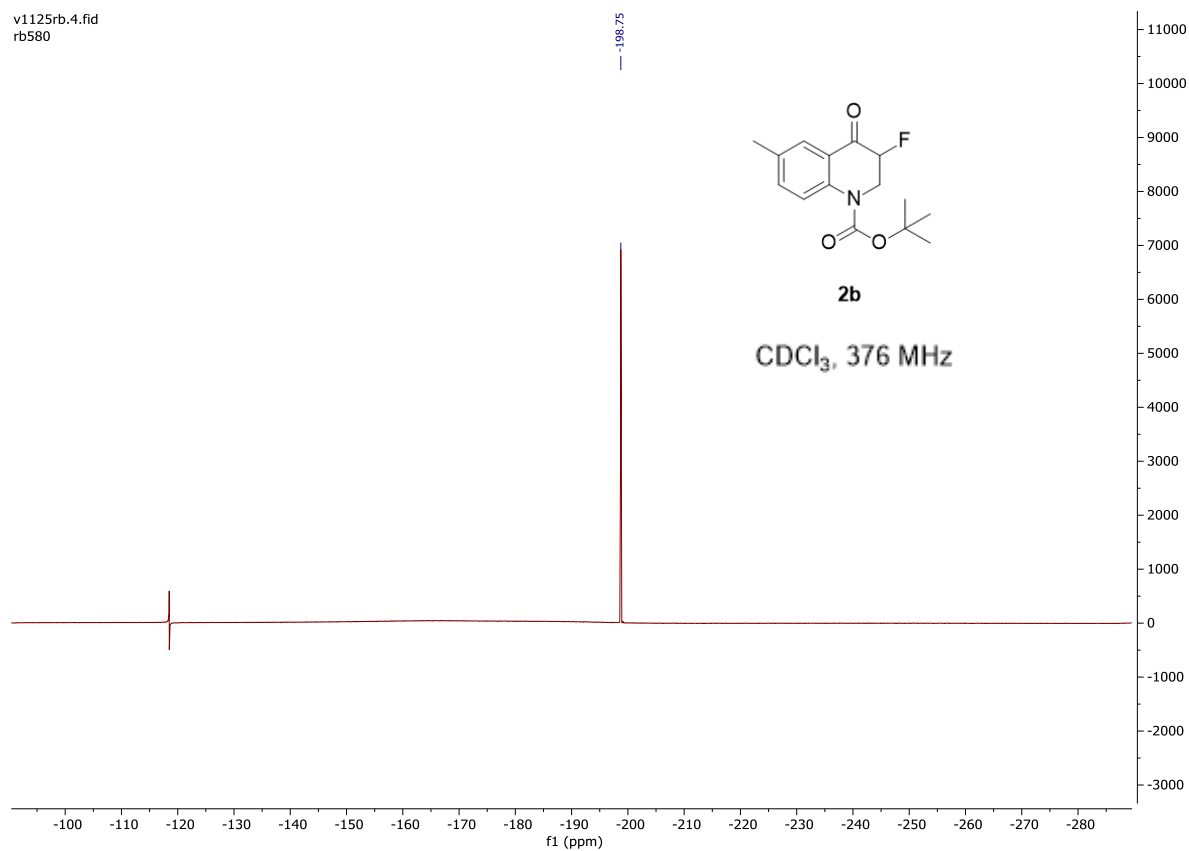

v1123rb.9.fid  
rb-mef

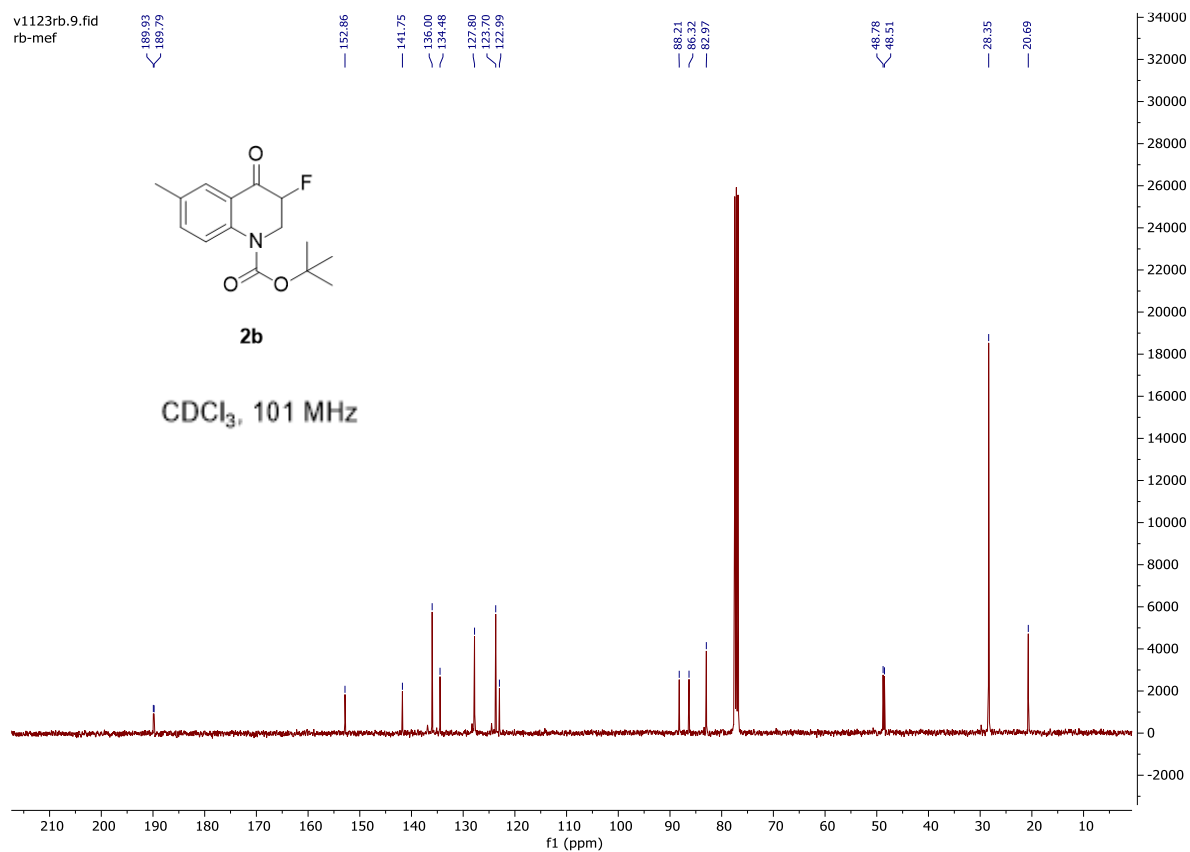

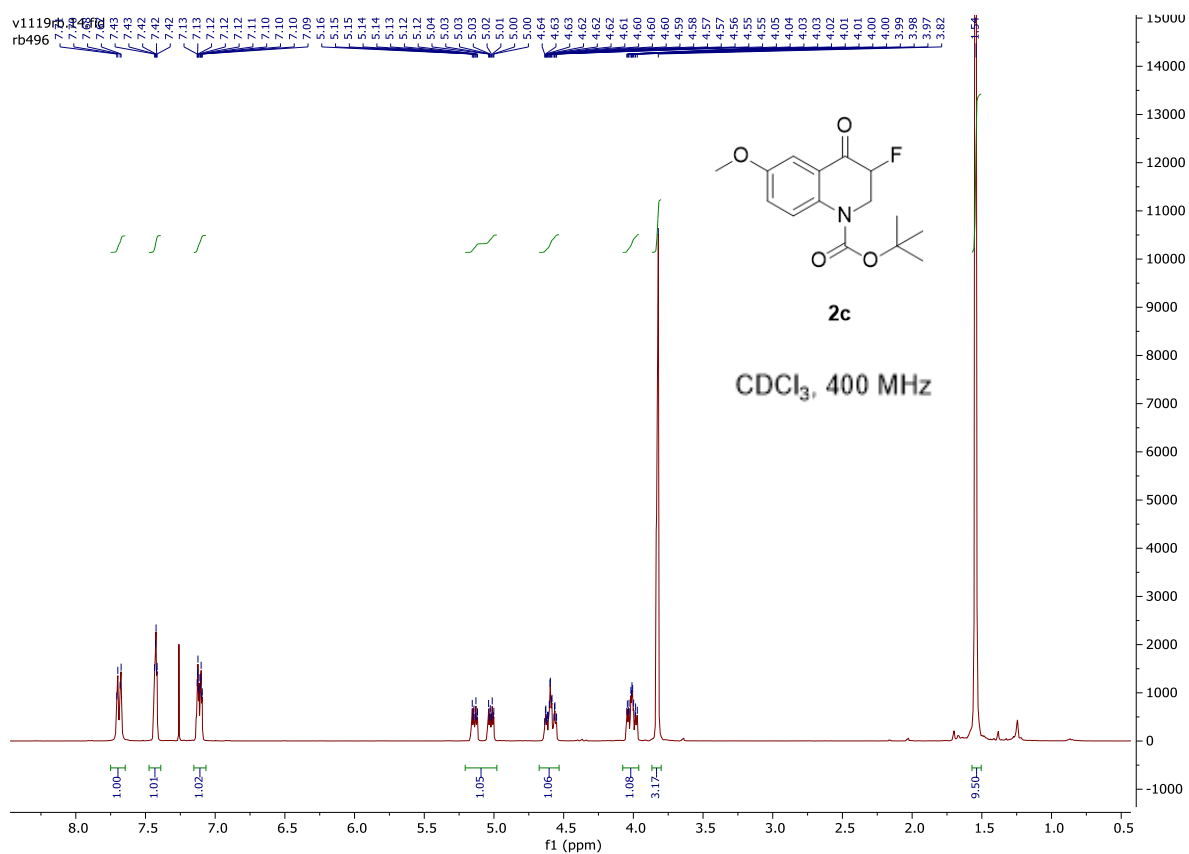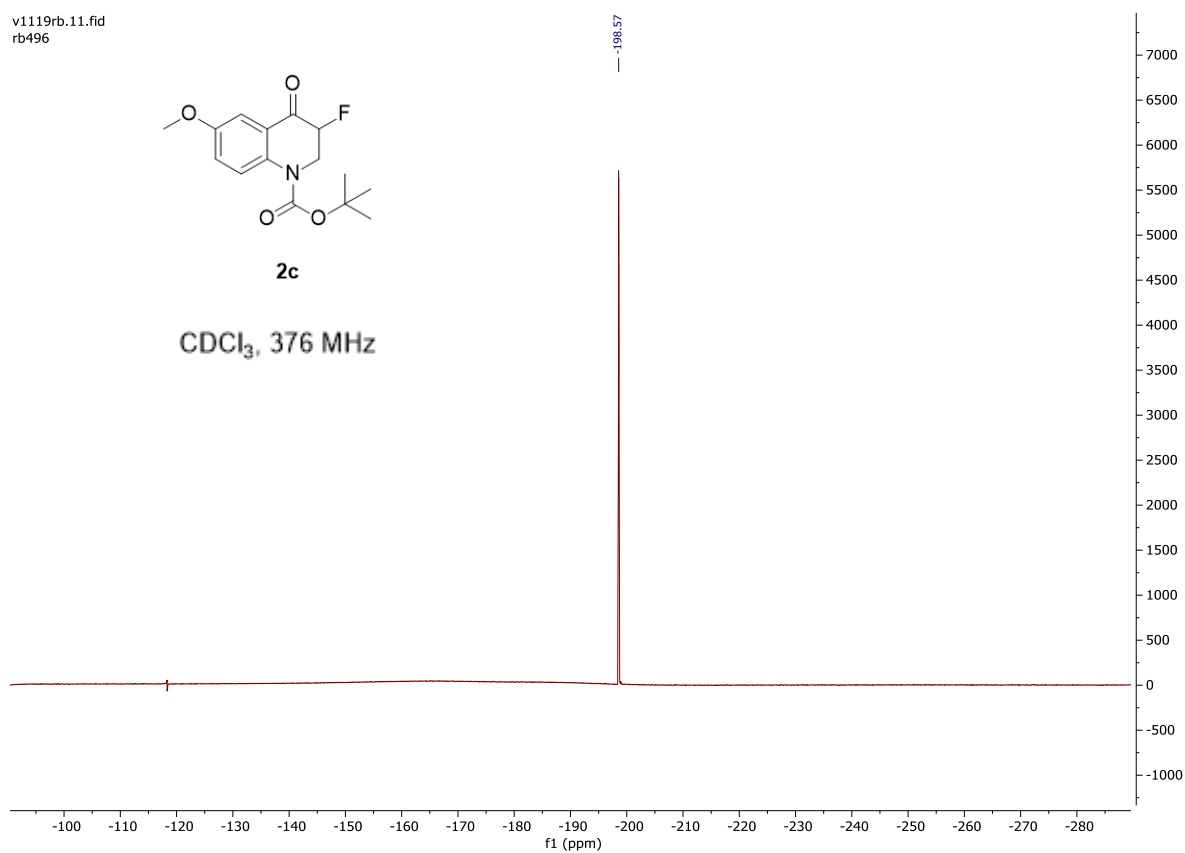

v1119rb.12.fid  
rb496

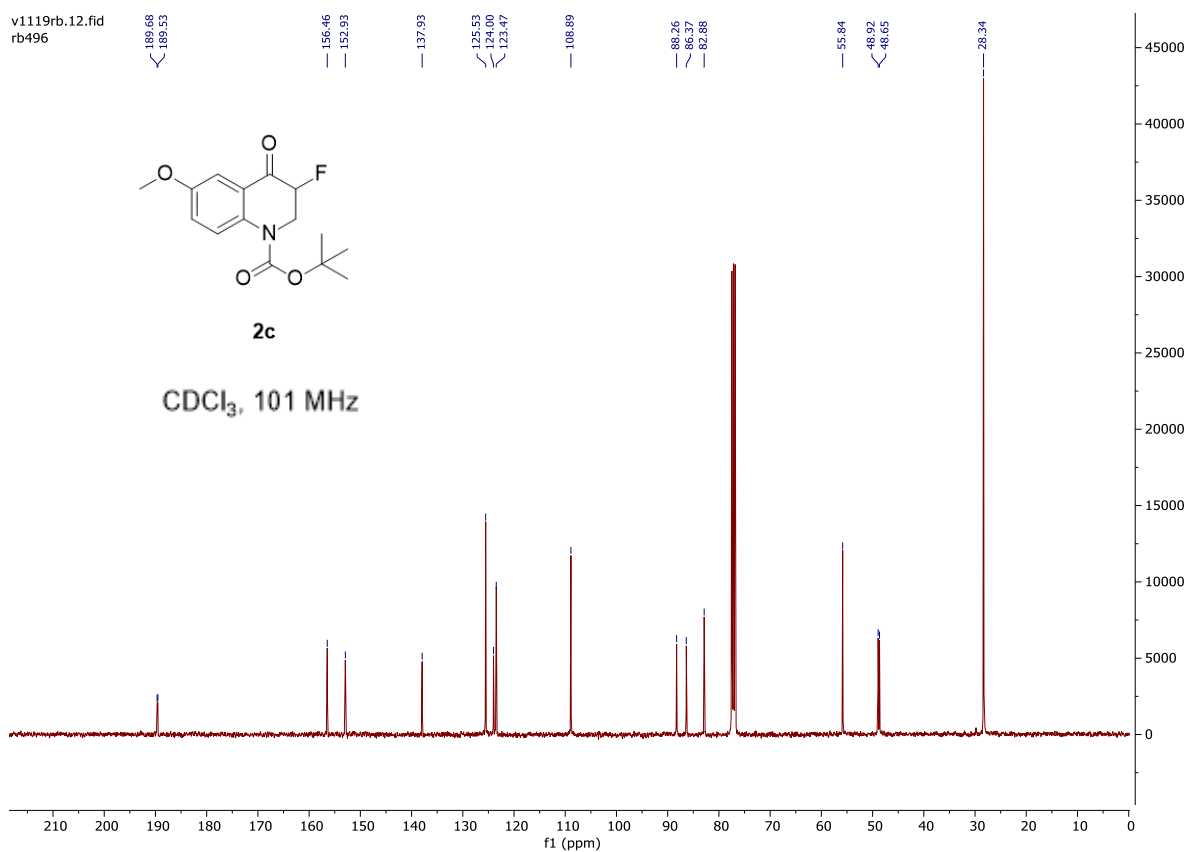

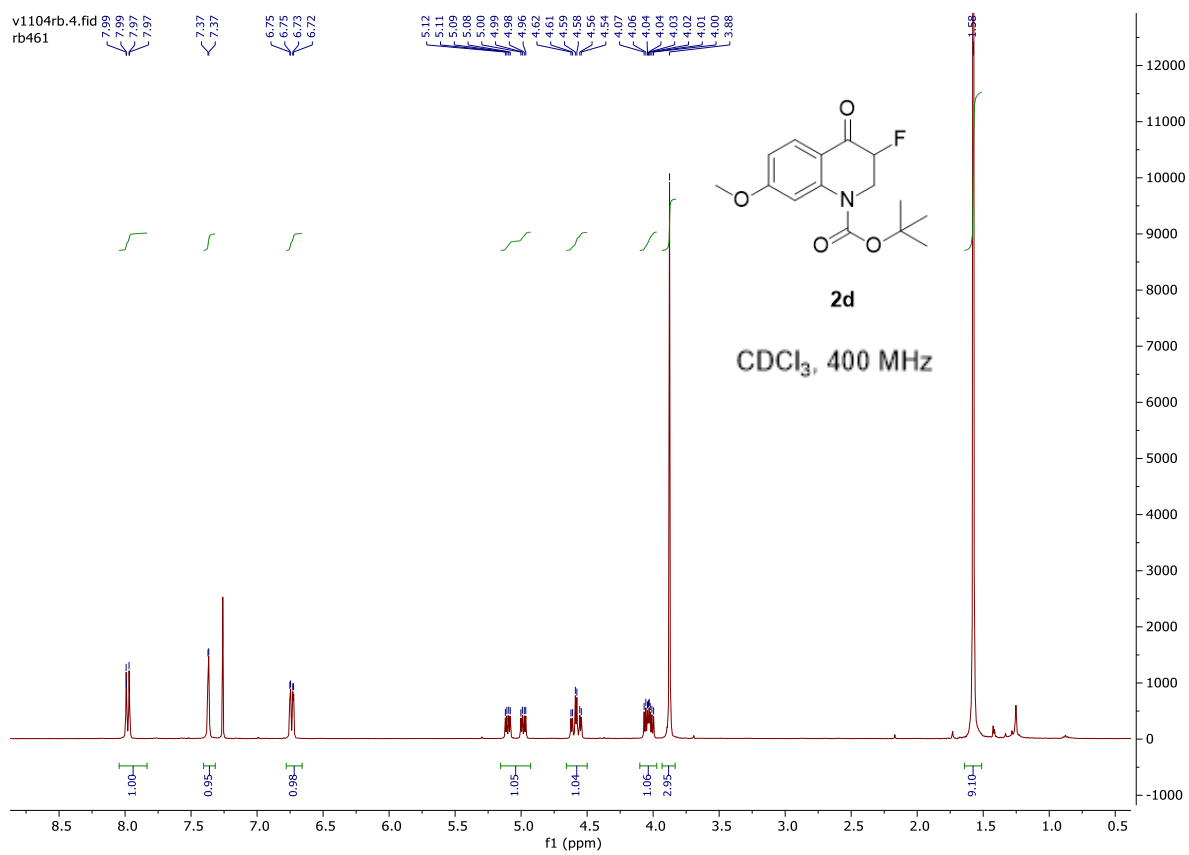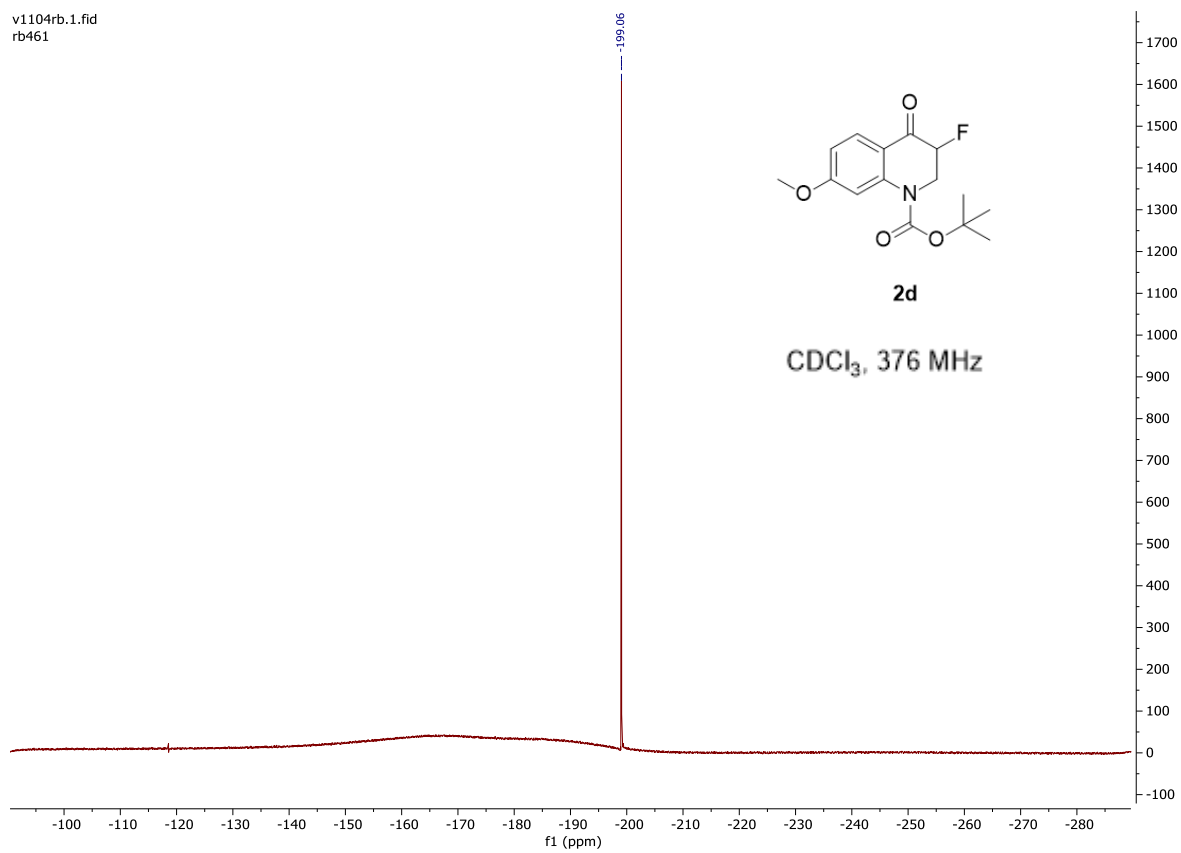



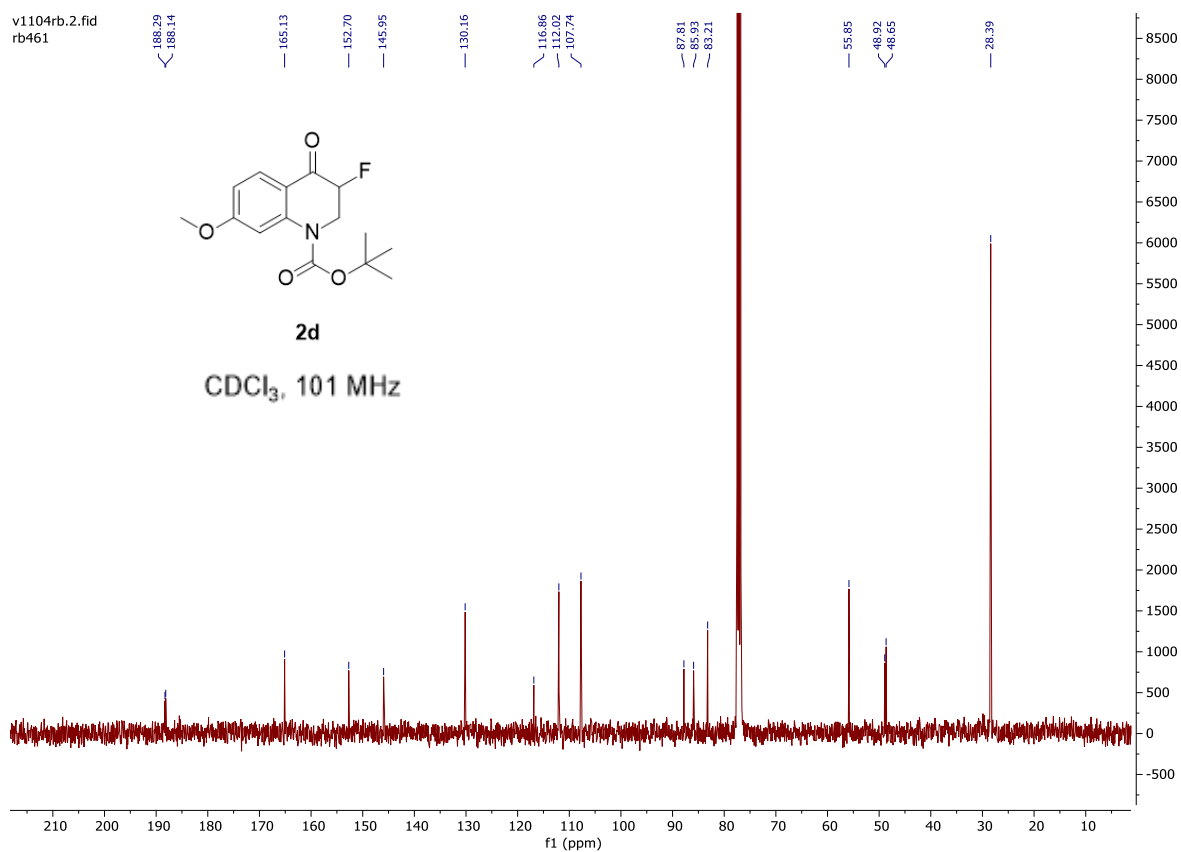

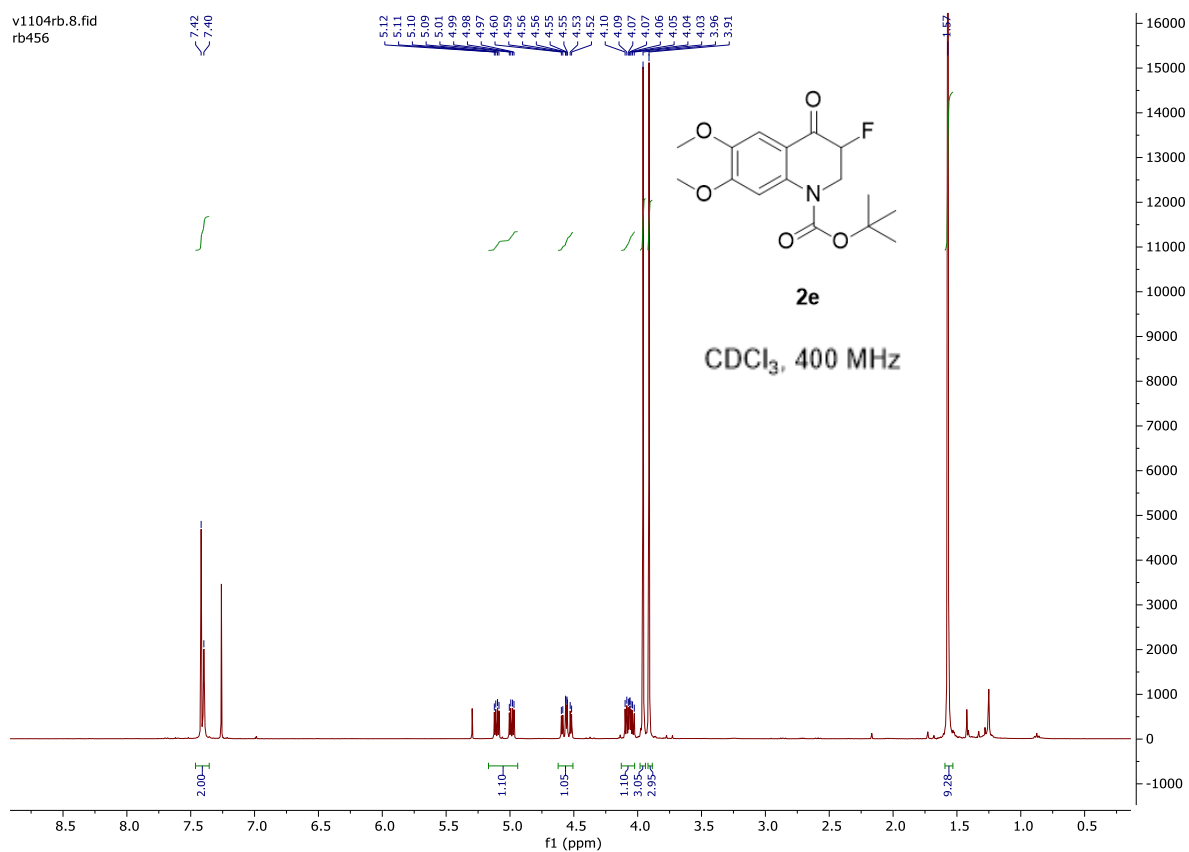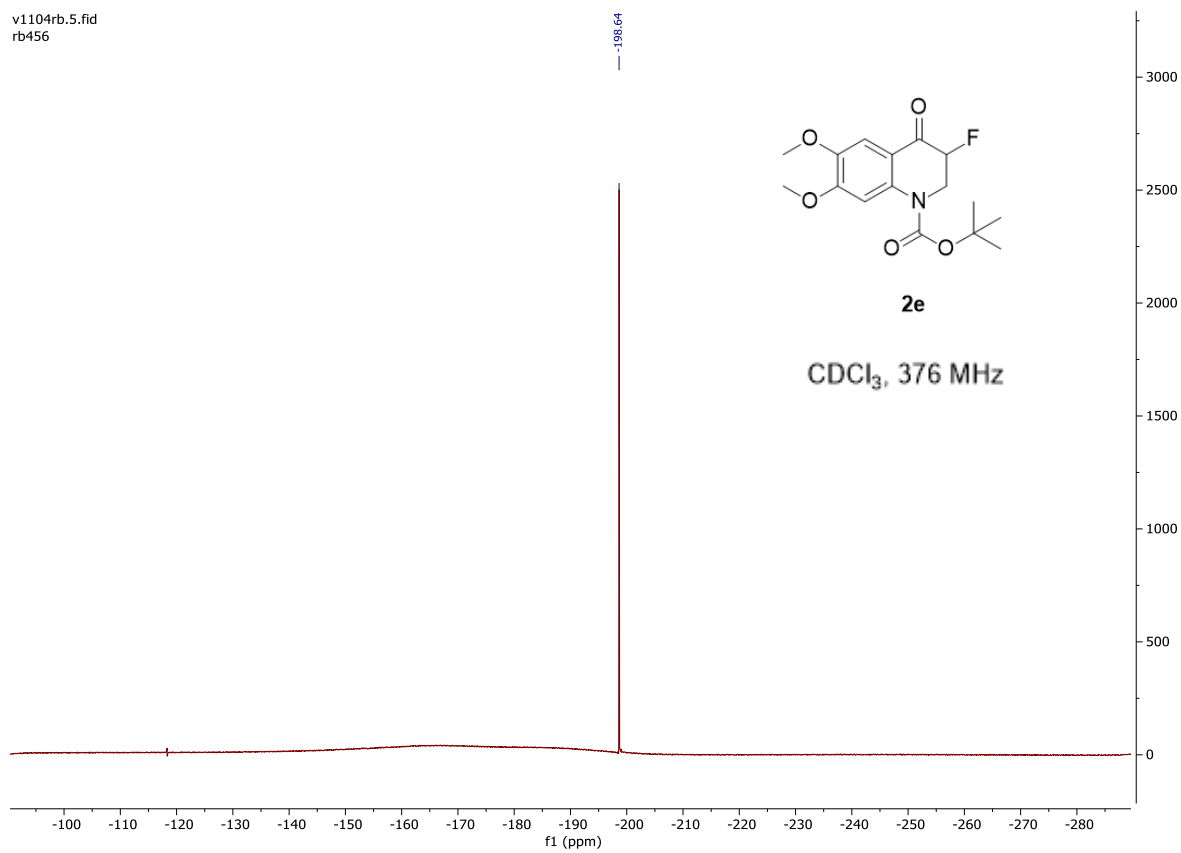

v1104rb.6.fid  
rb456

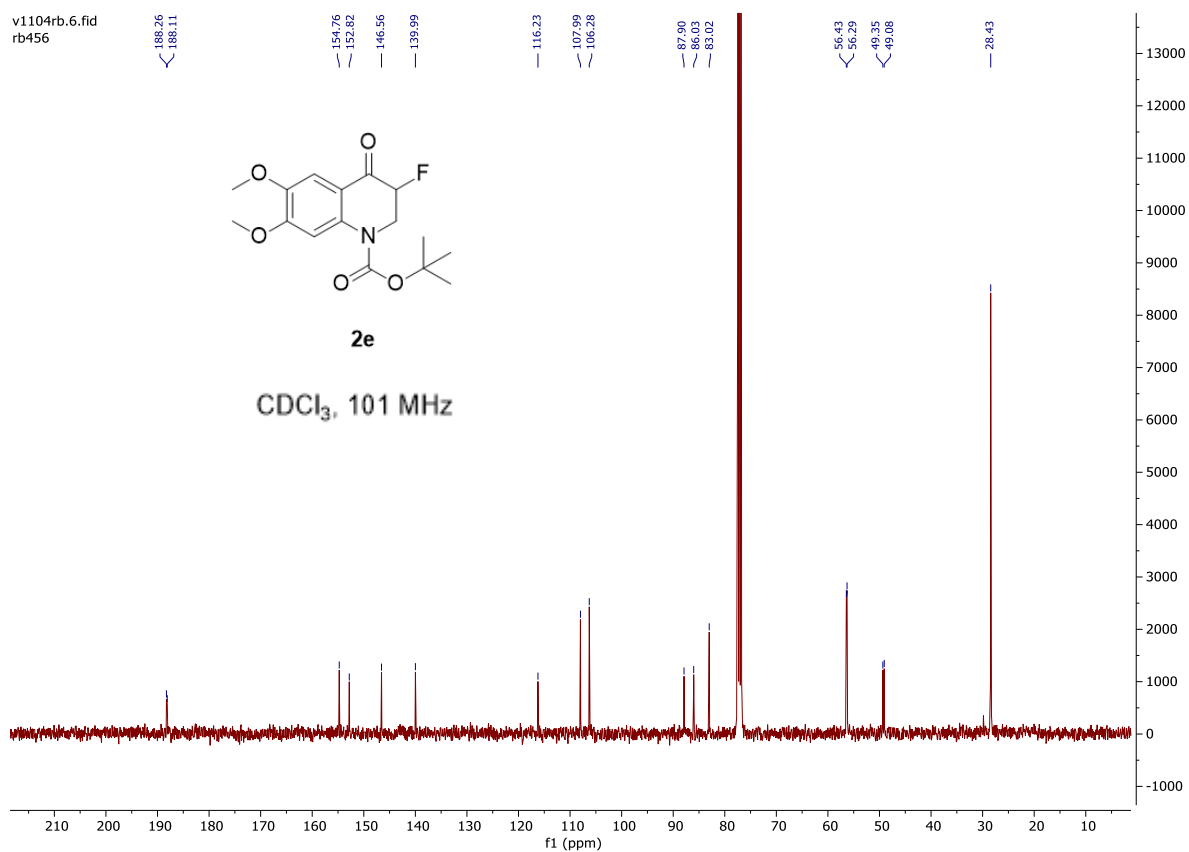

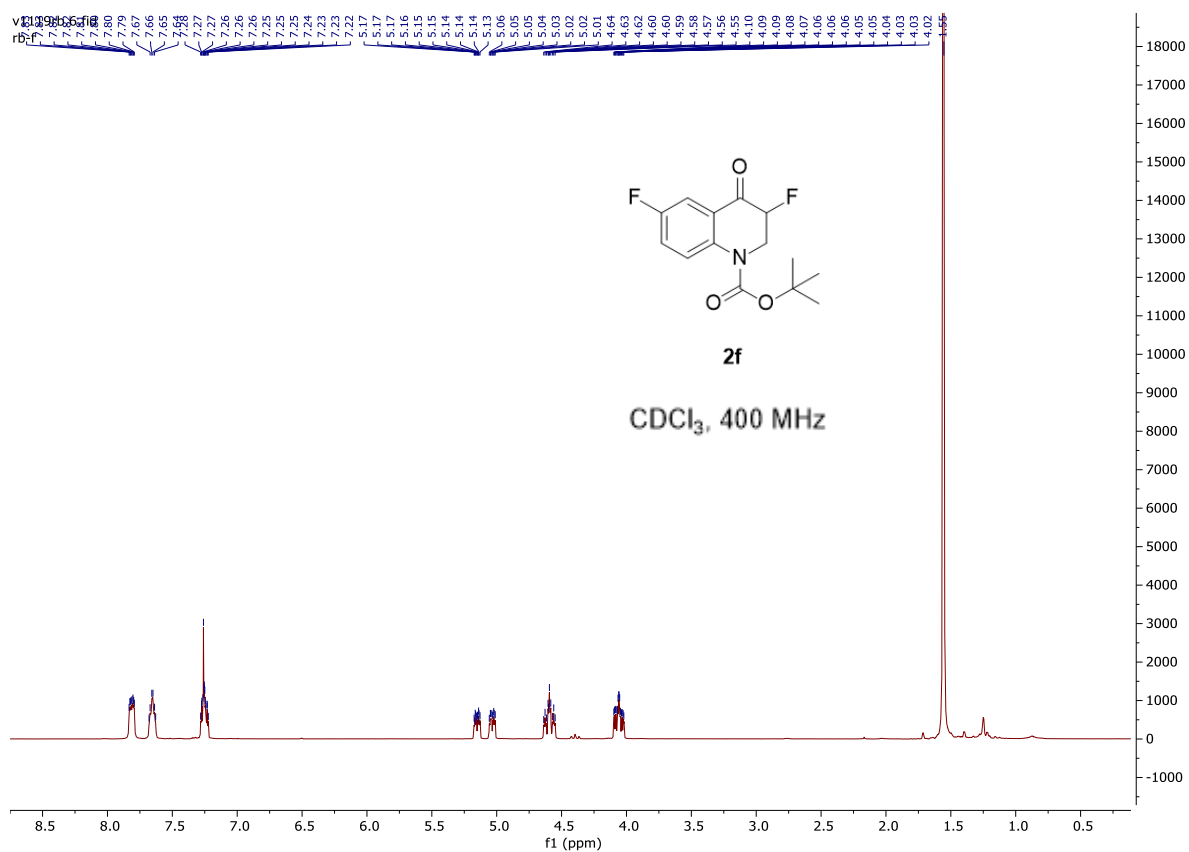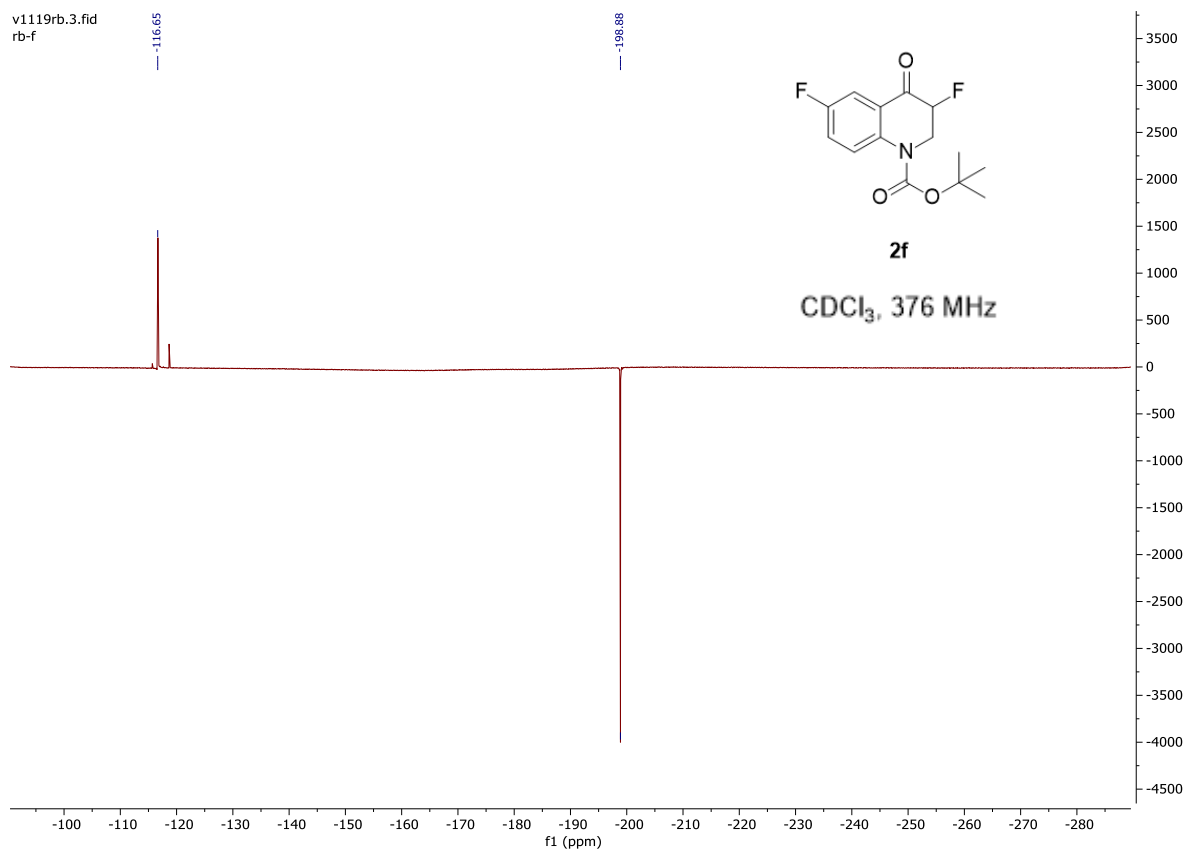

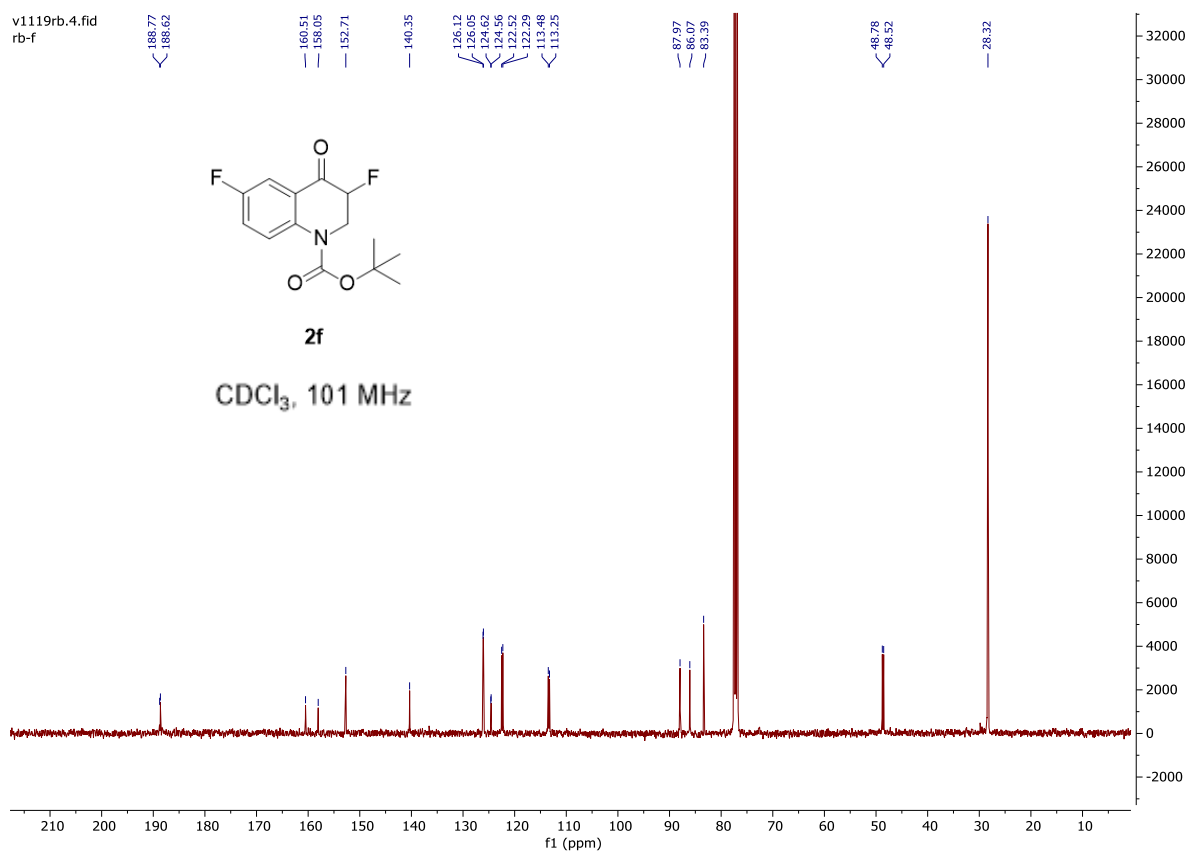

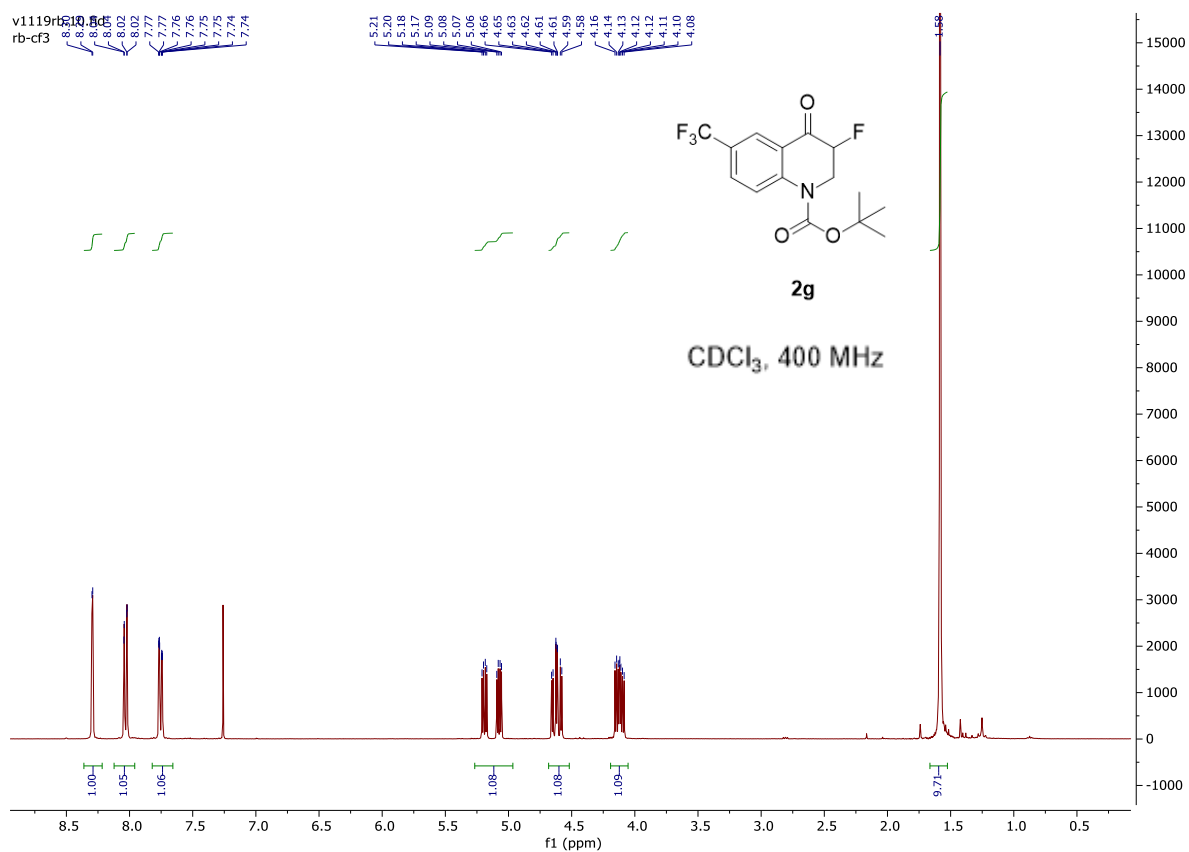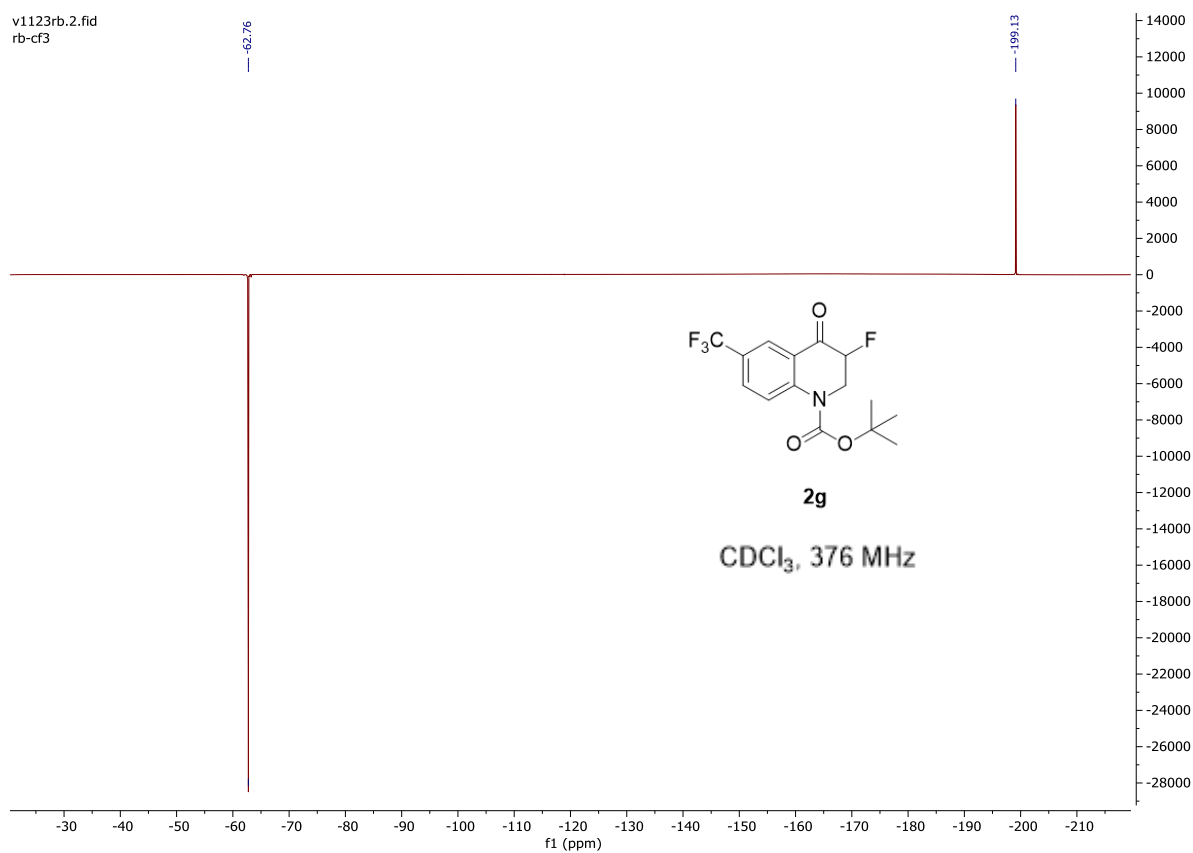

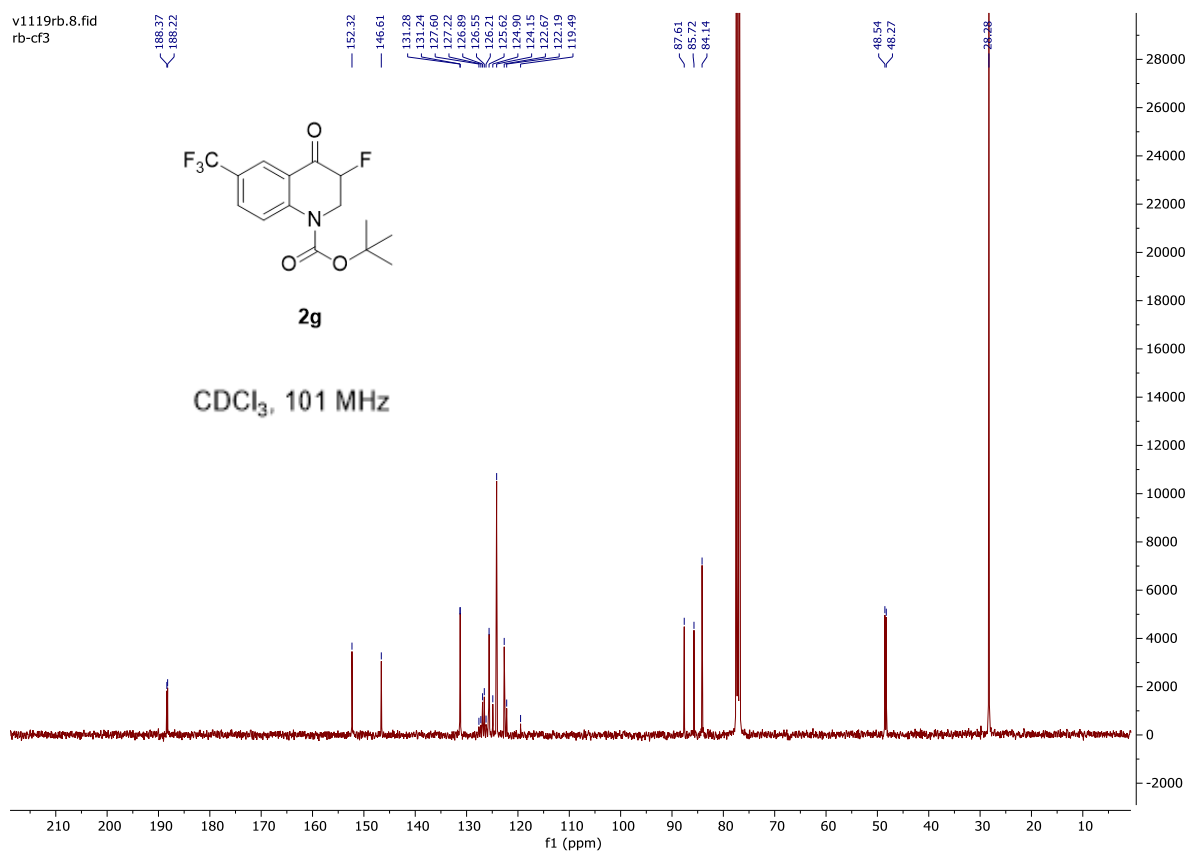

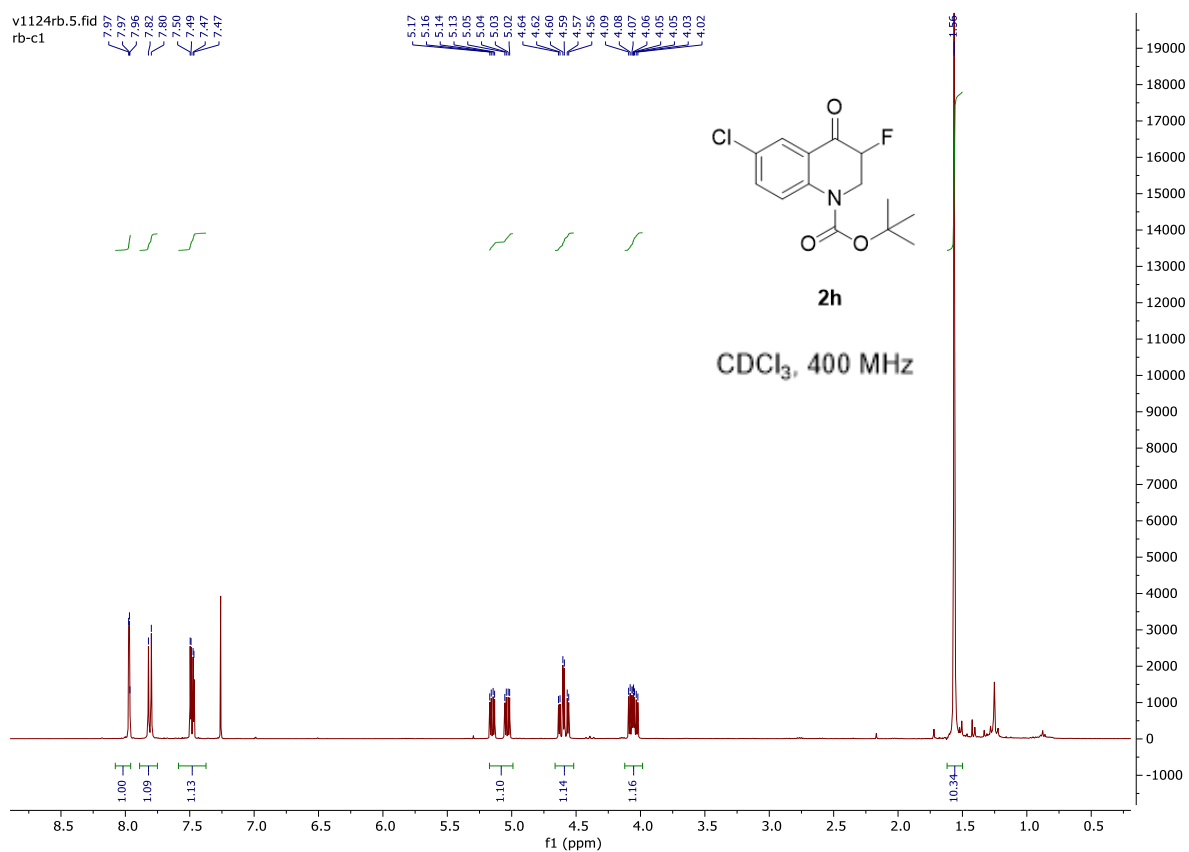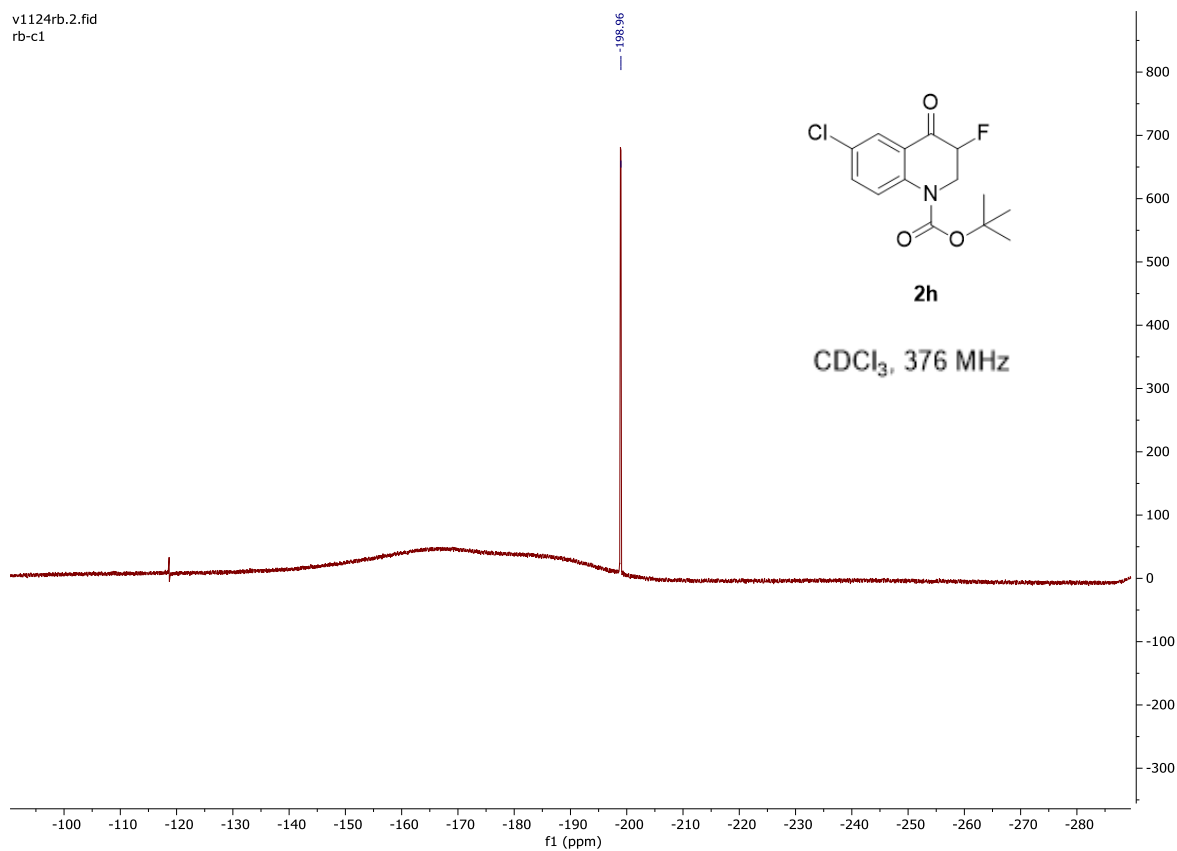



v1124rb.3.fid  
rb-c1

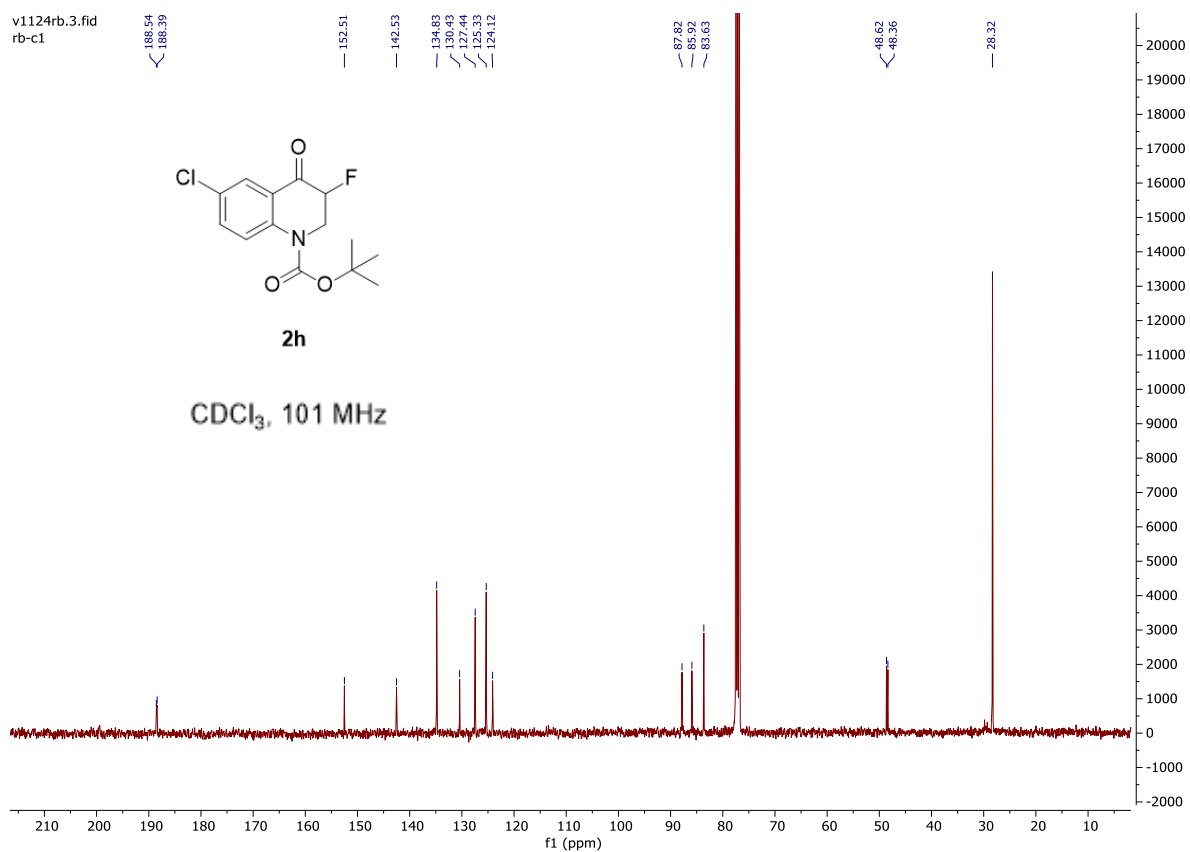

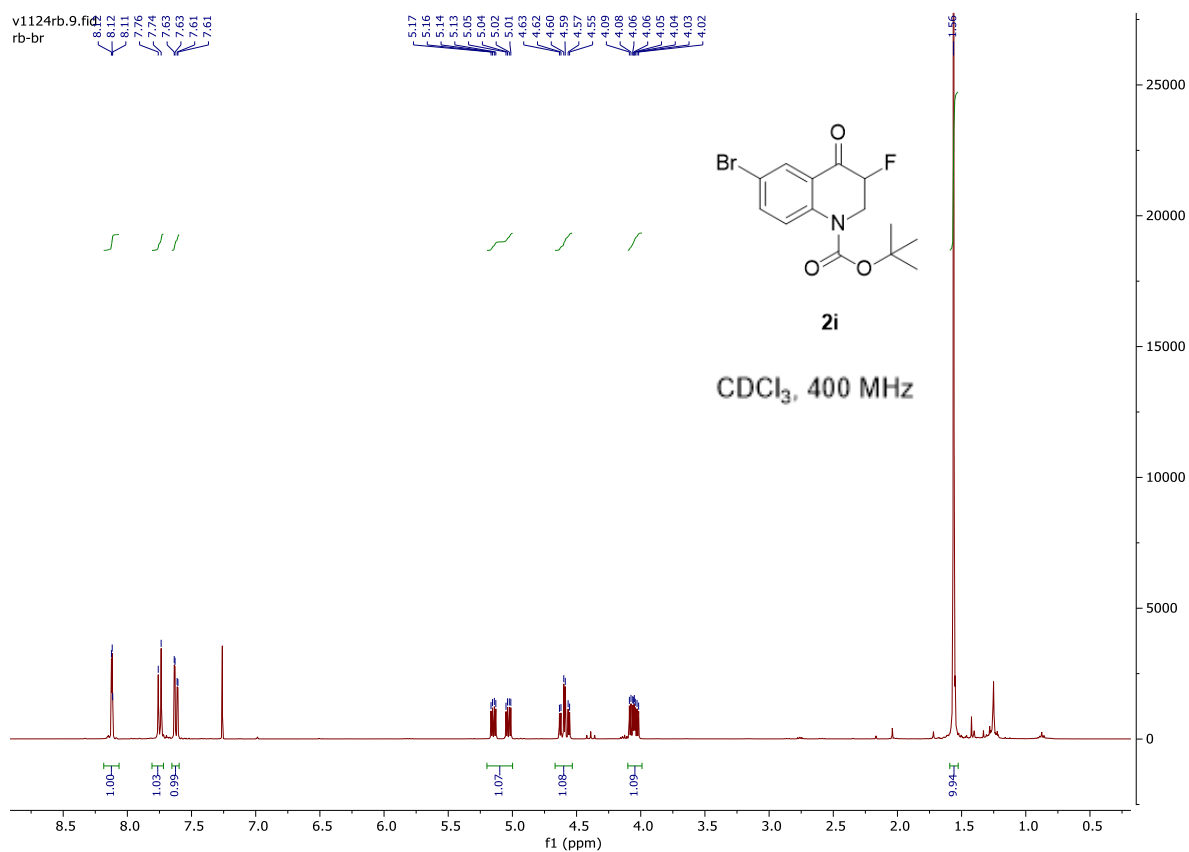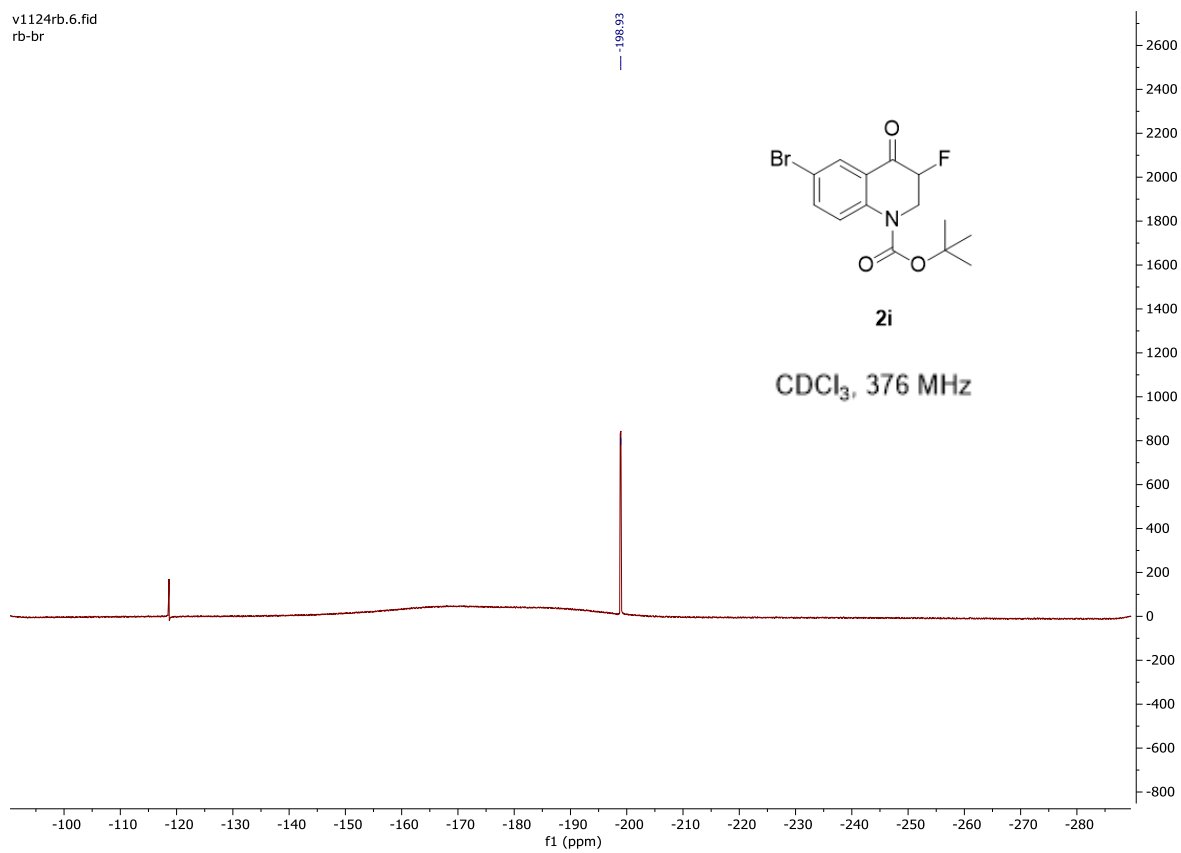

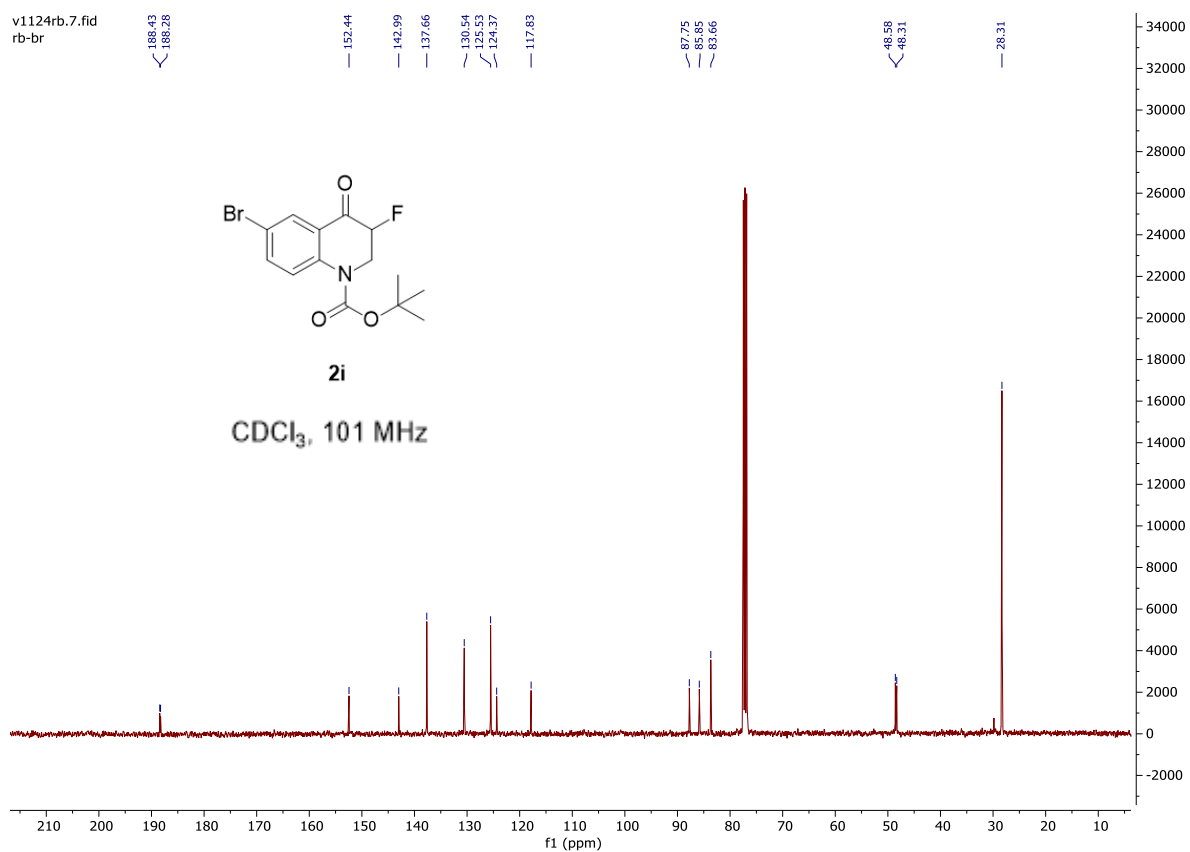

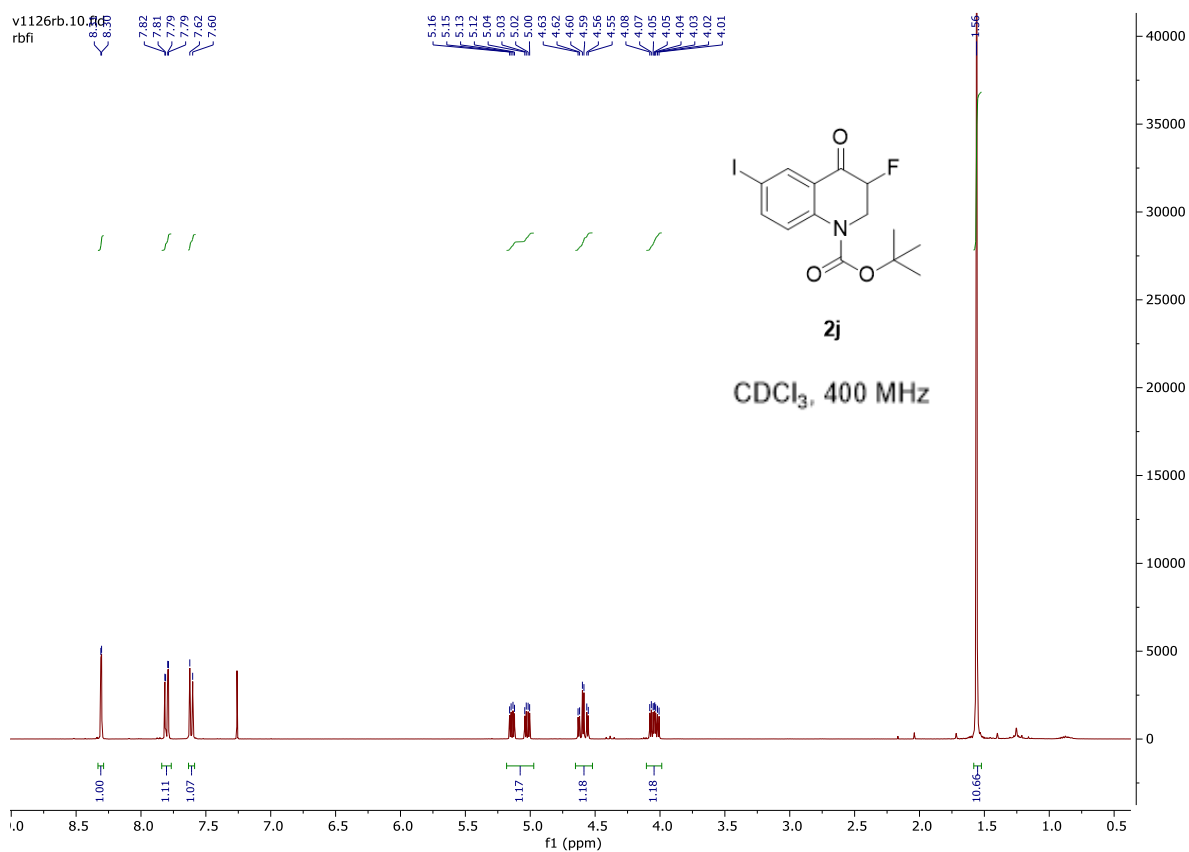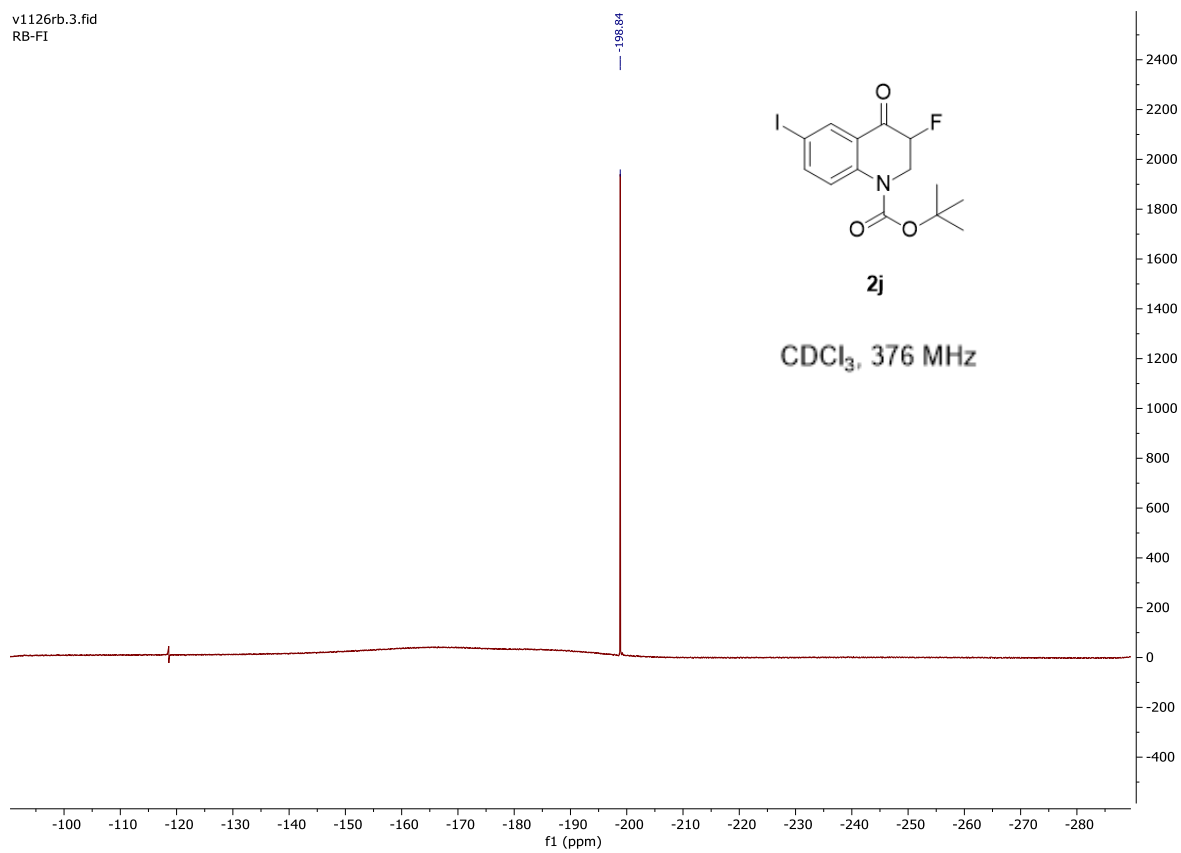

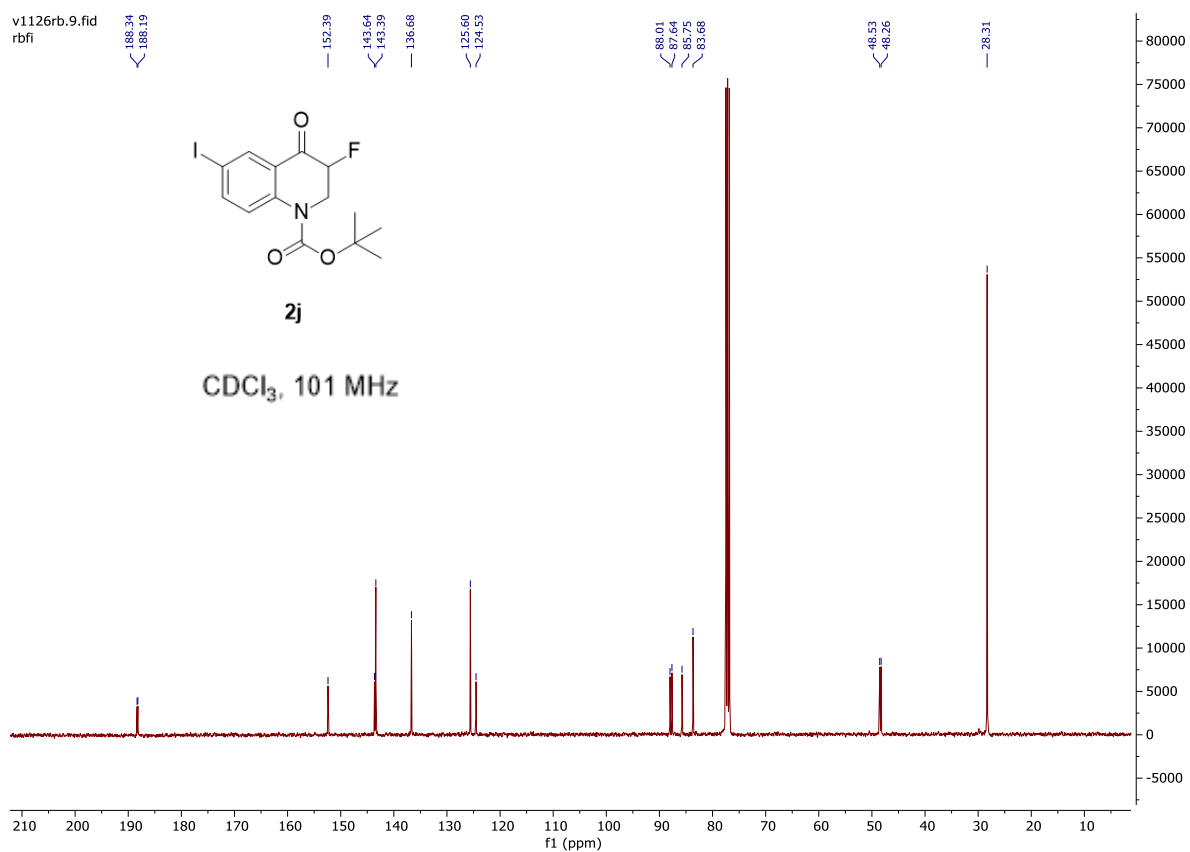

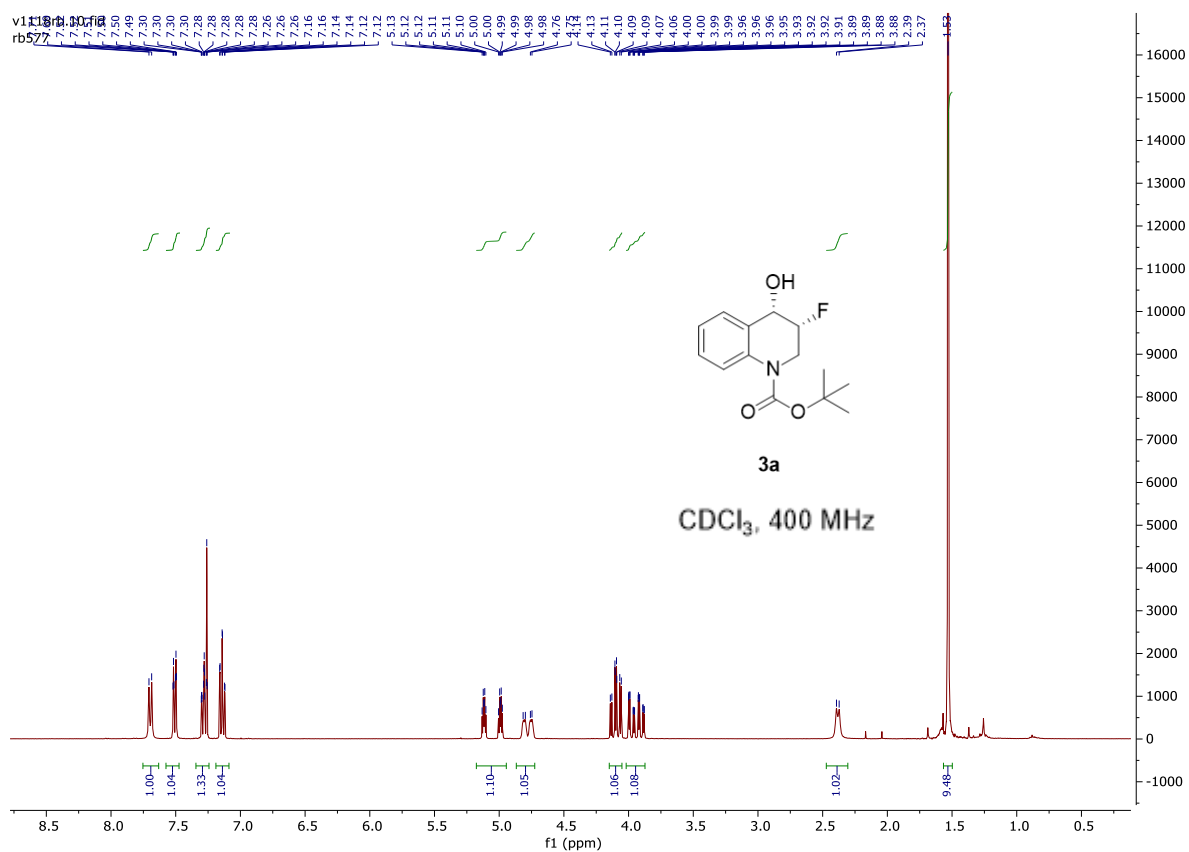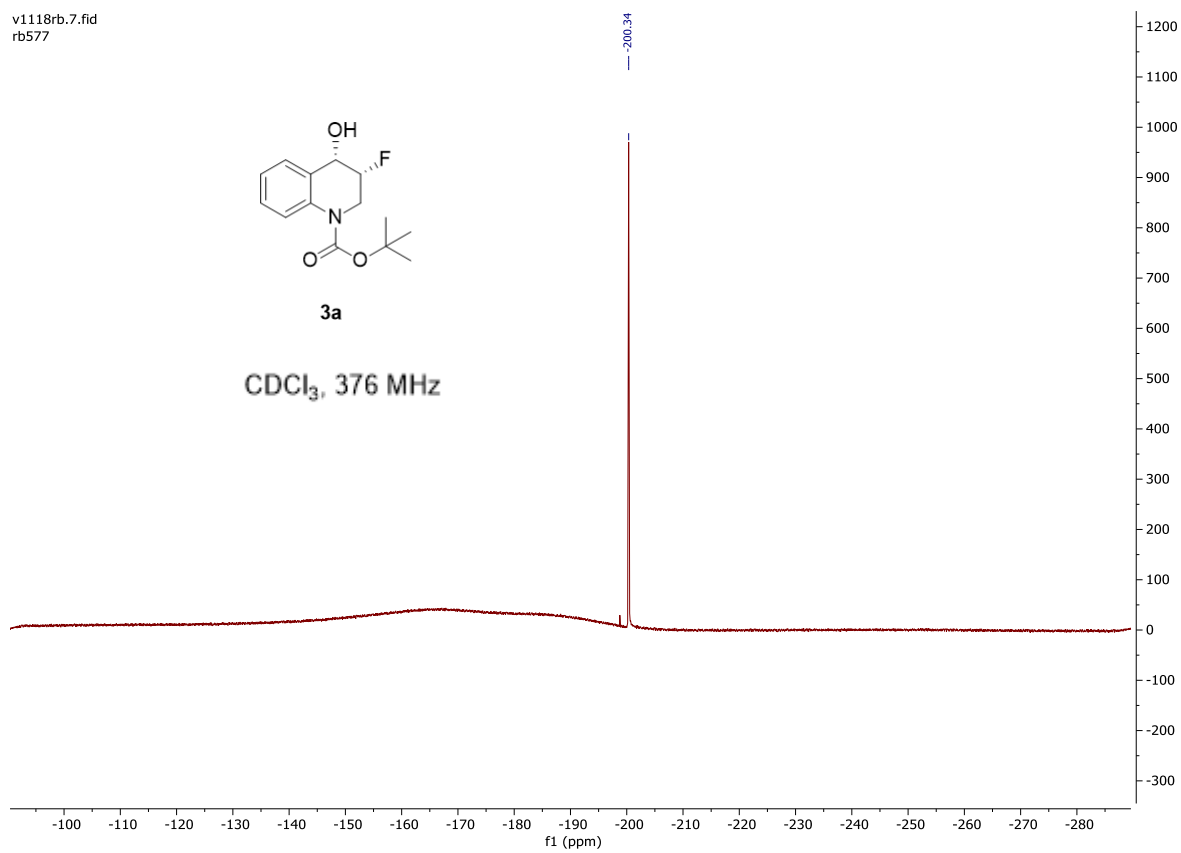

v1118rb.8.fid  
rb577

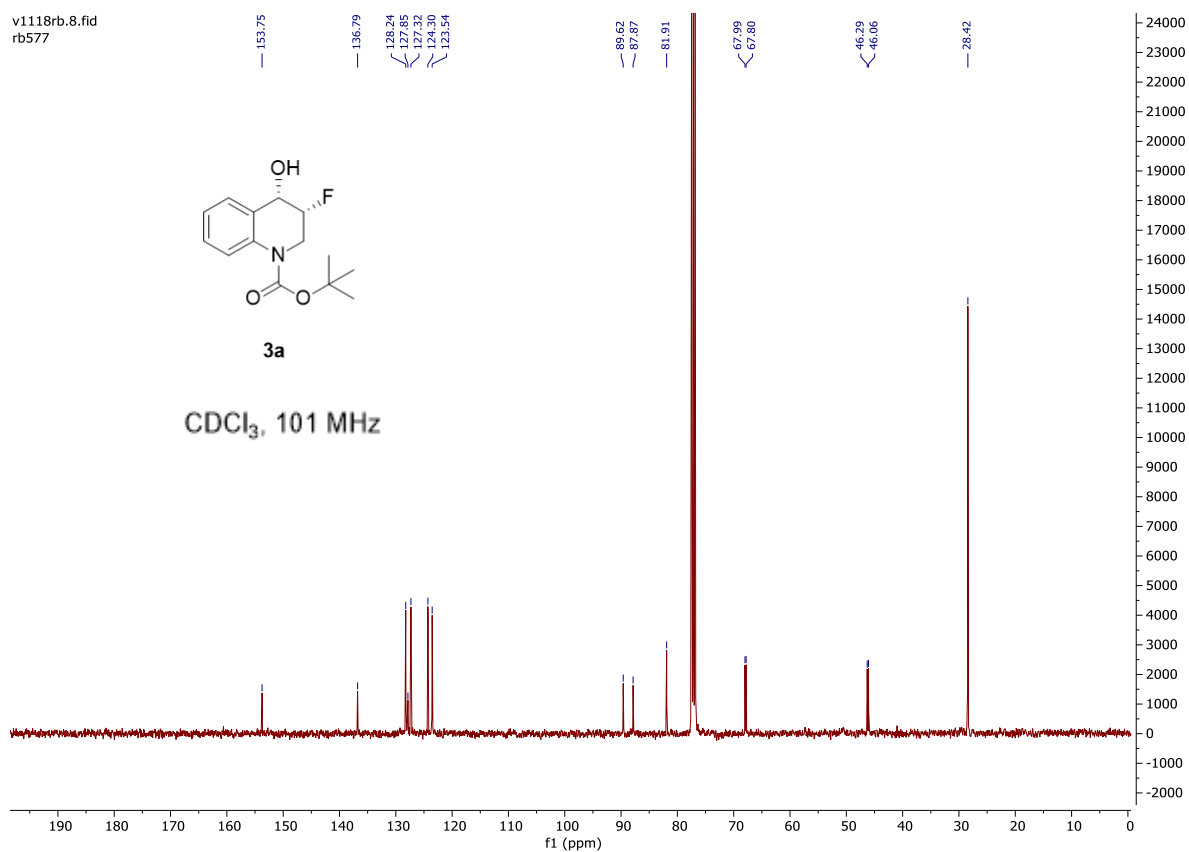

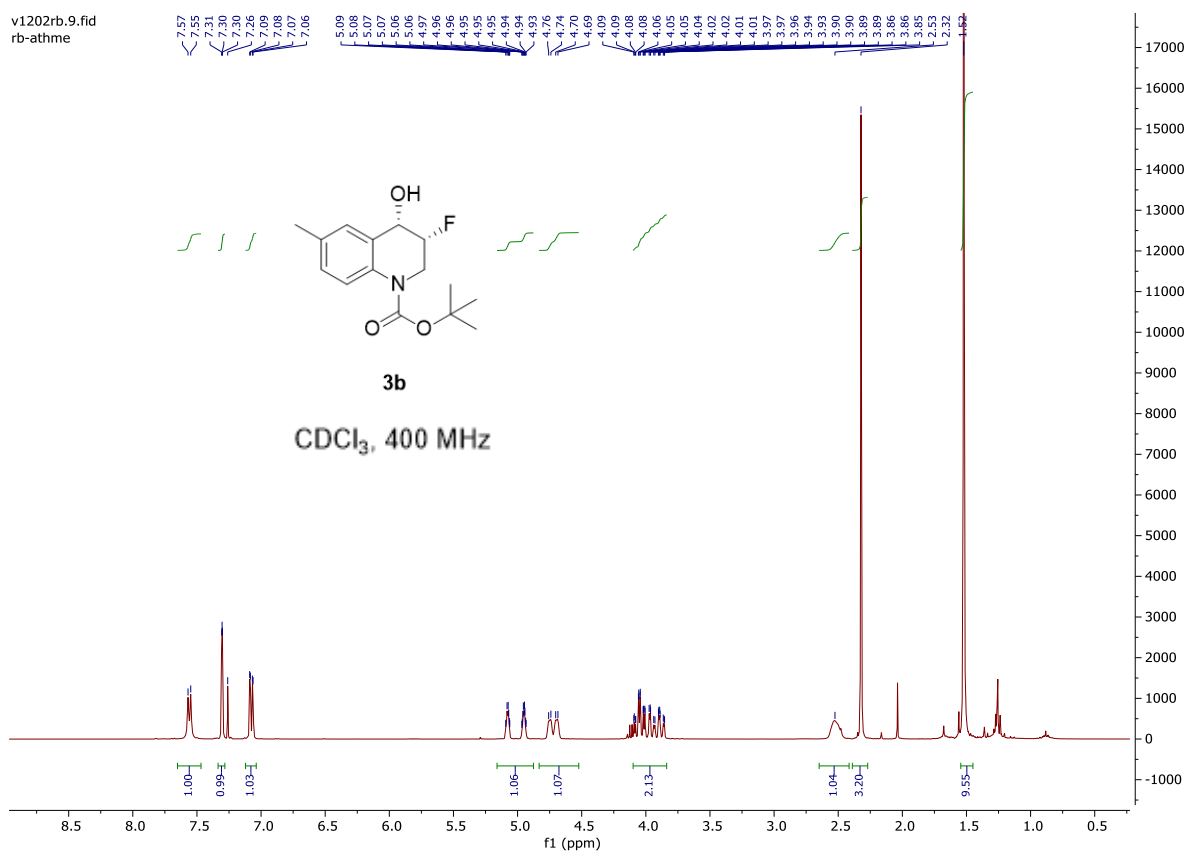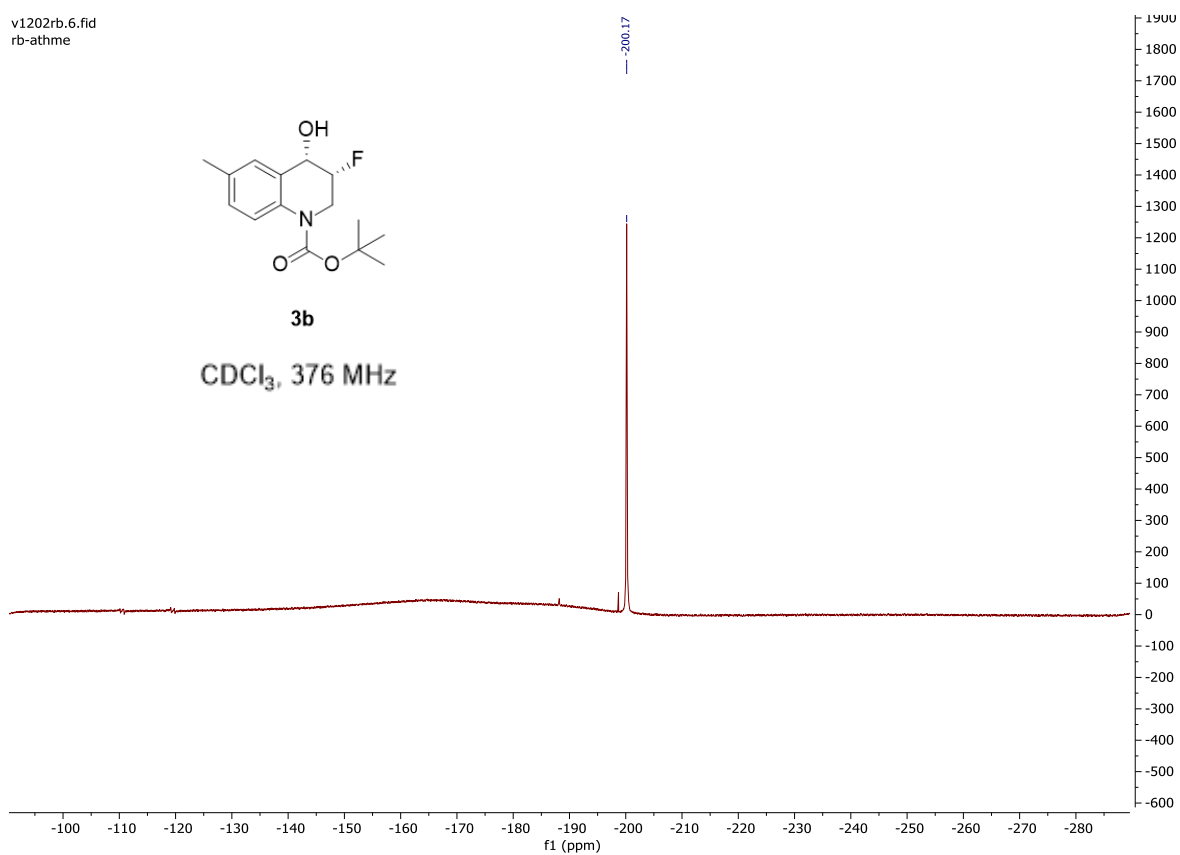



v1202rb.7.fid  
rb-athme

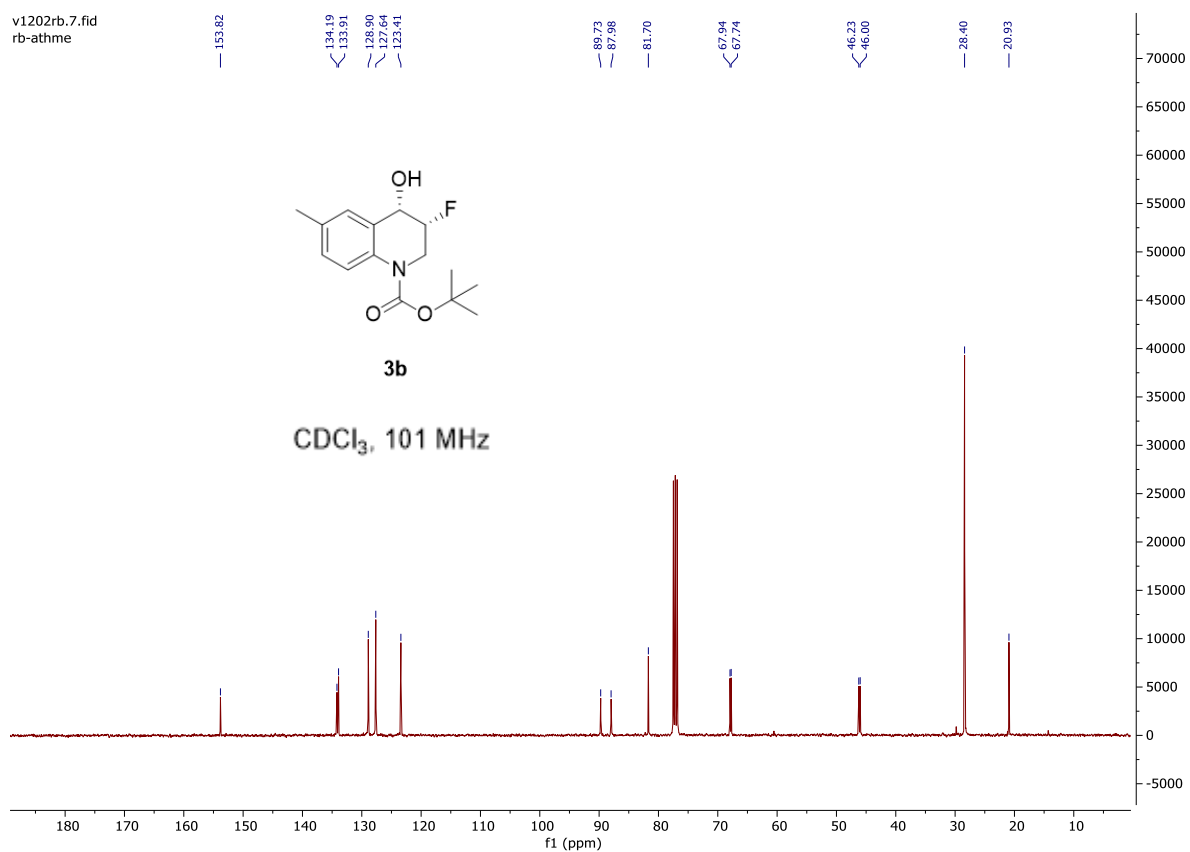

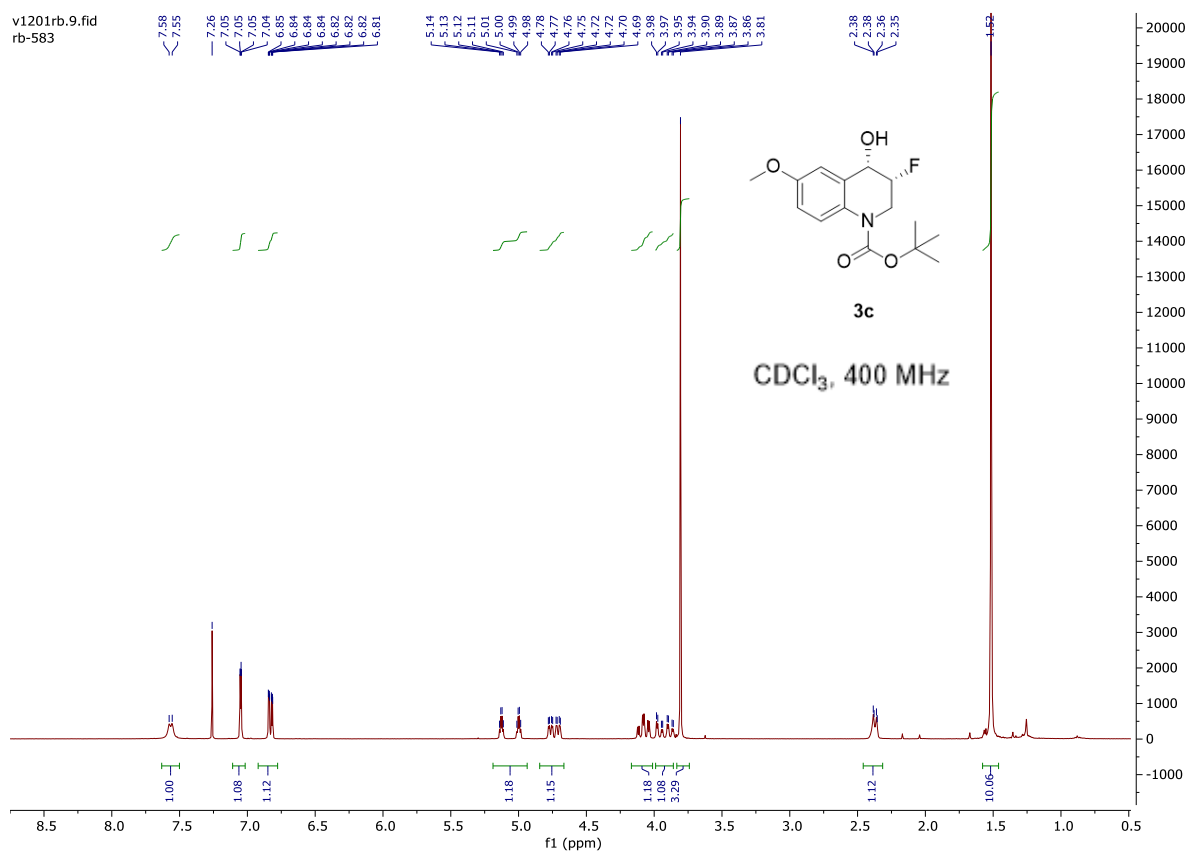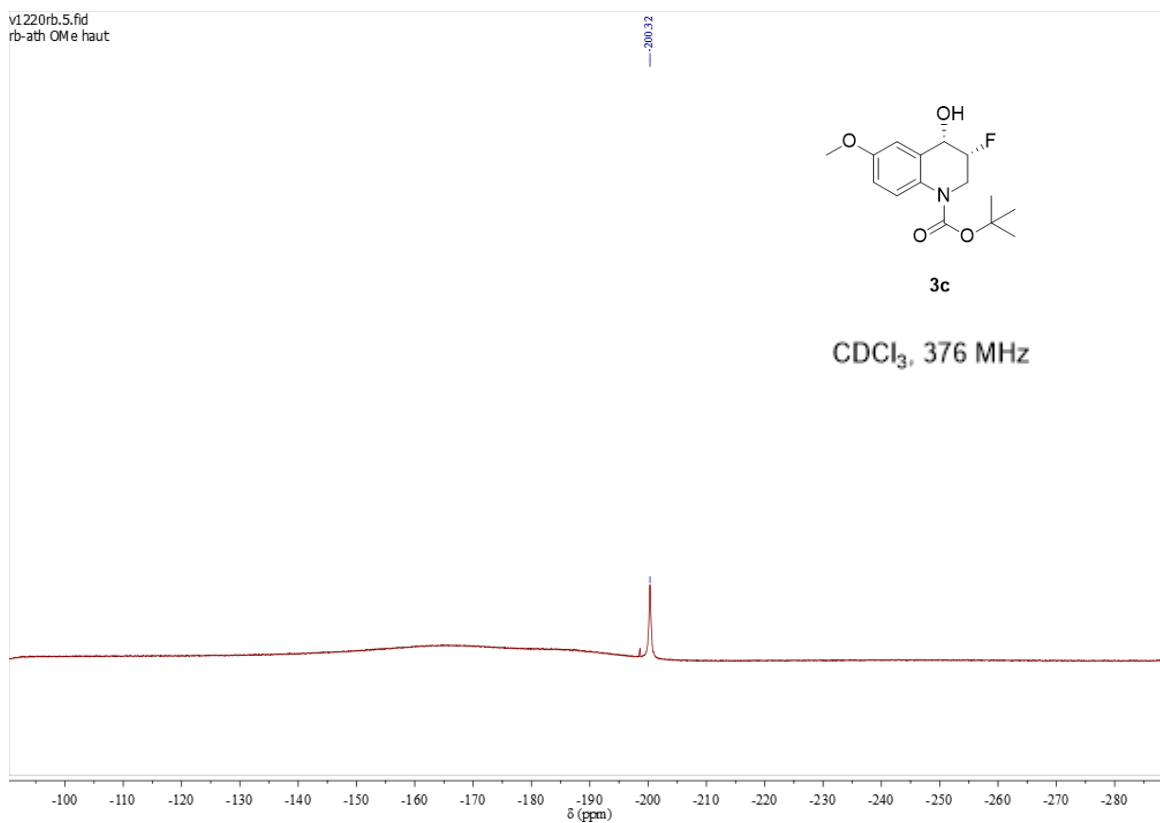

v1201rb.7.fid  
rb-583

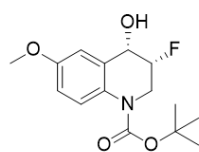

3c

CDCl<sub>3</sub>, 101 MHz

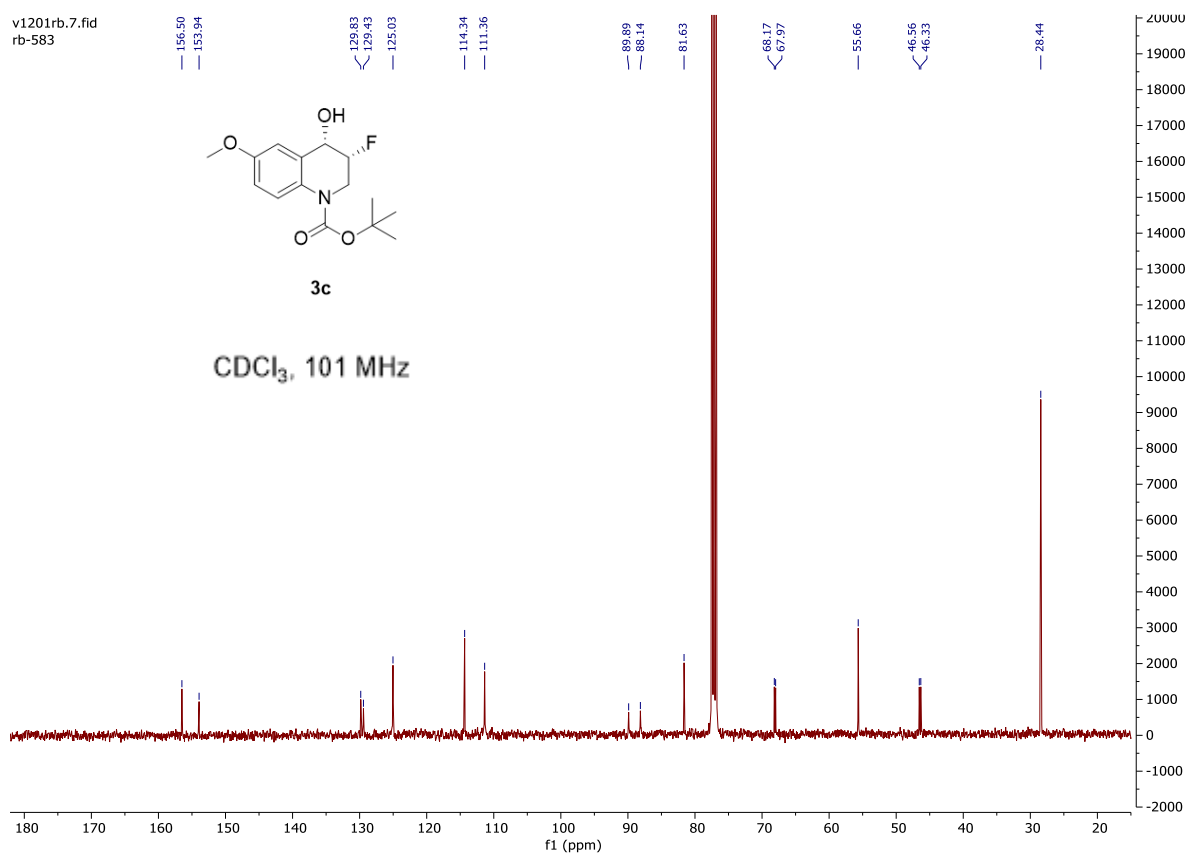

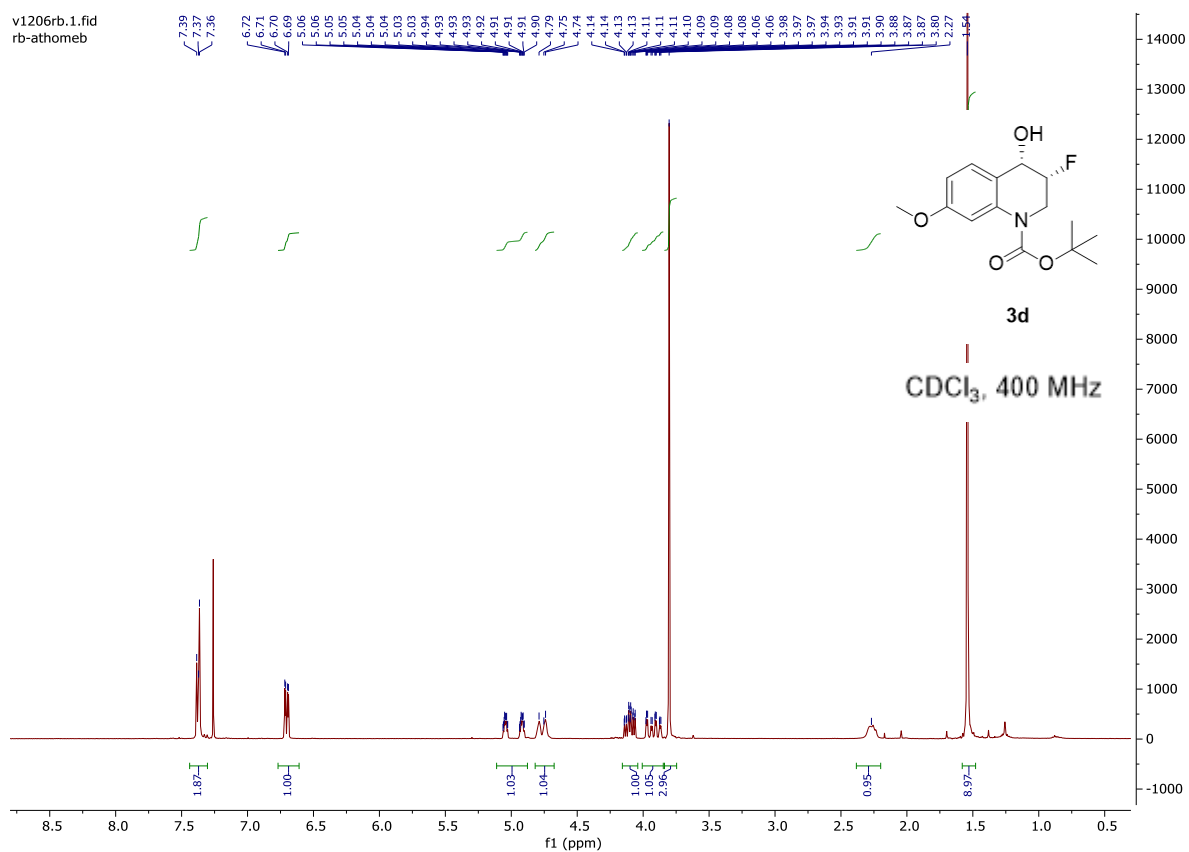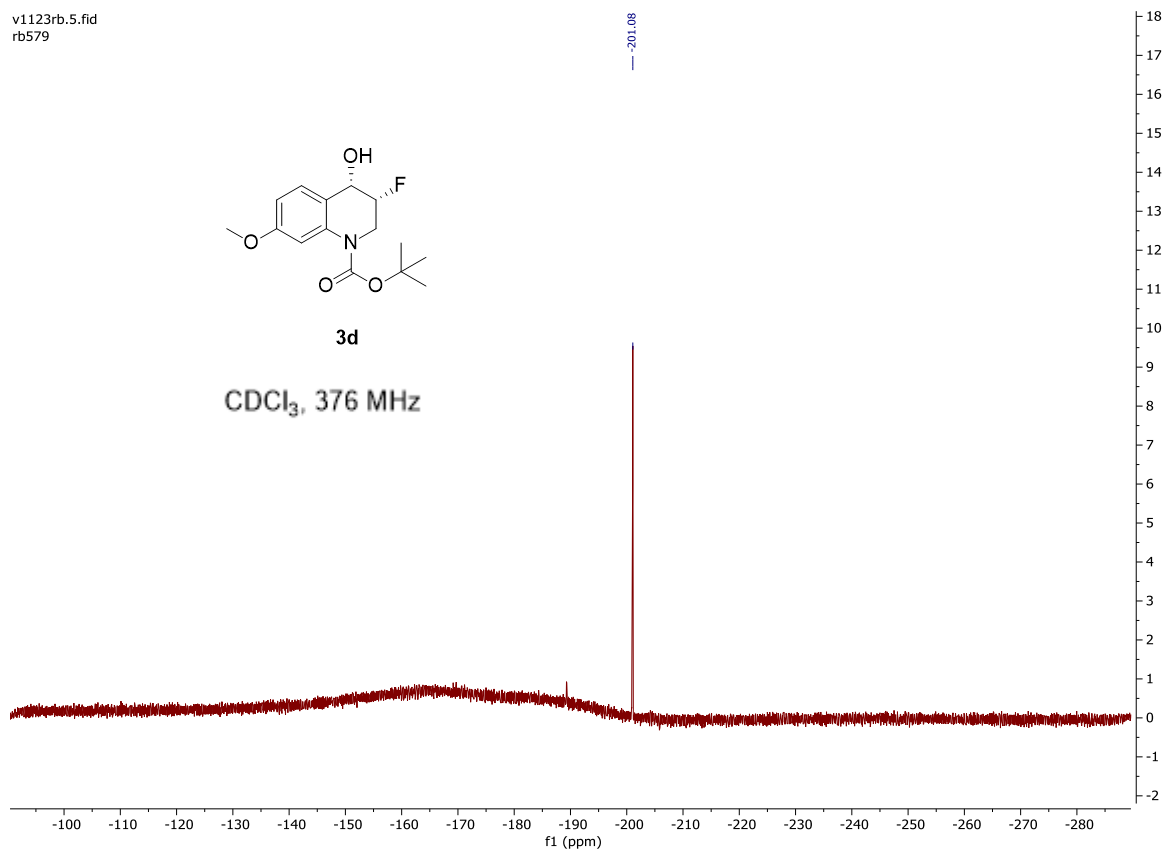

v1123rb.6.fid  
rb579

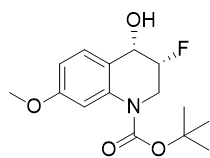

**3d**

CDCl<sub>3</sub>, 101 MHz

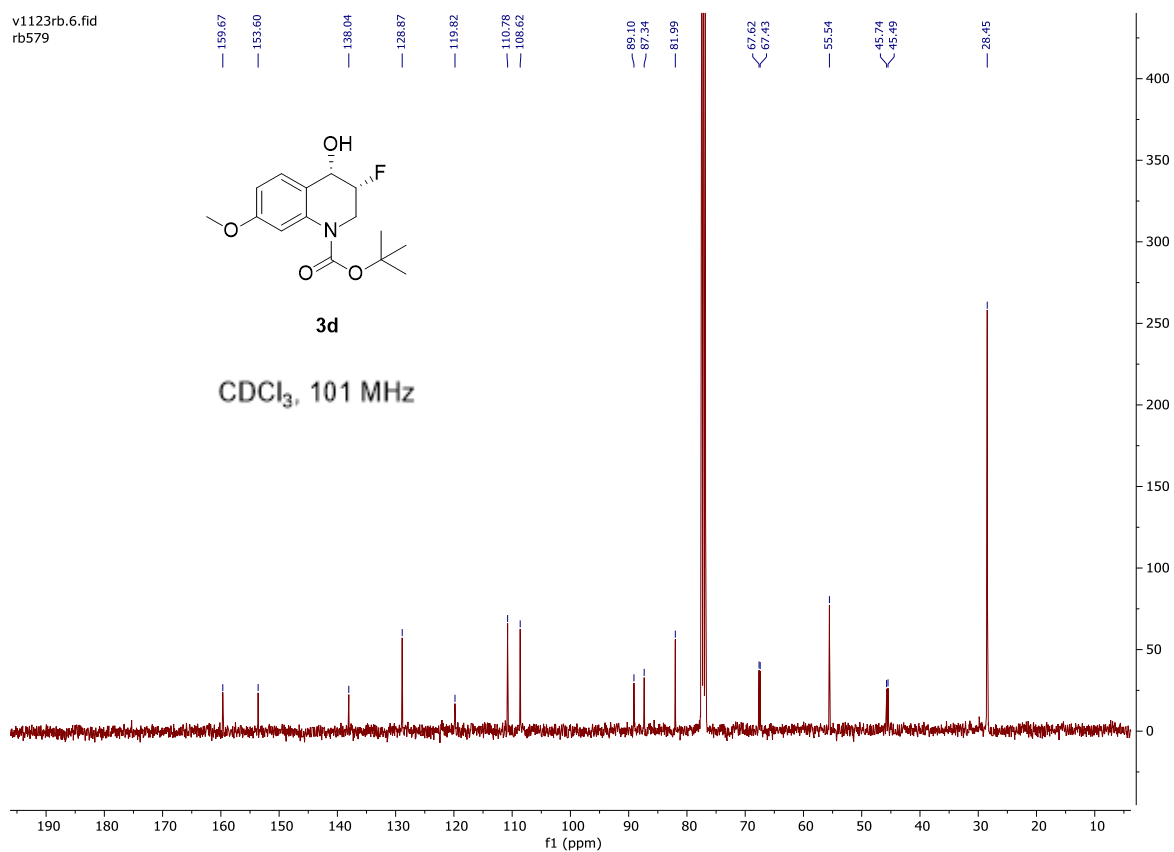

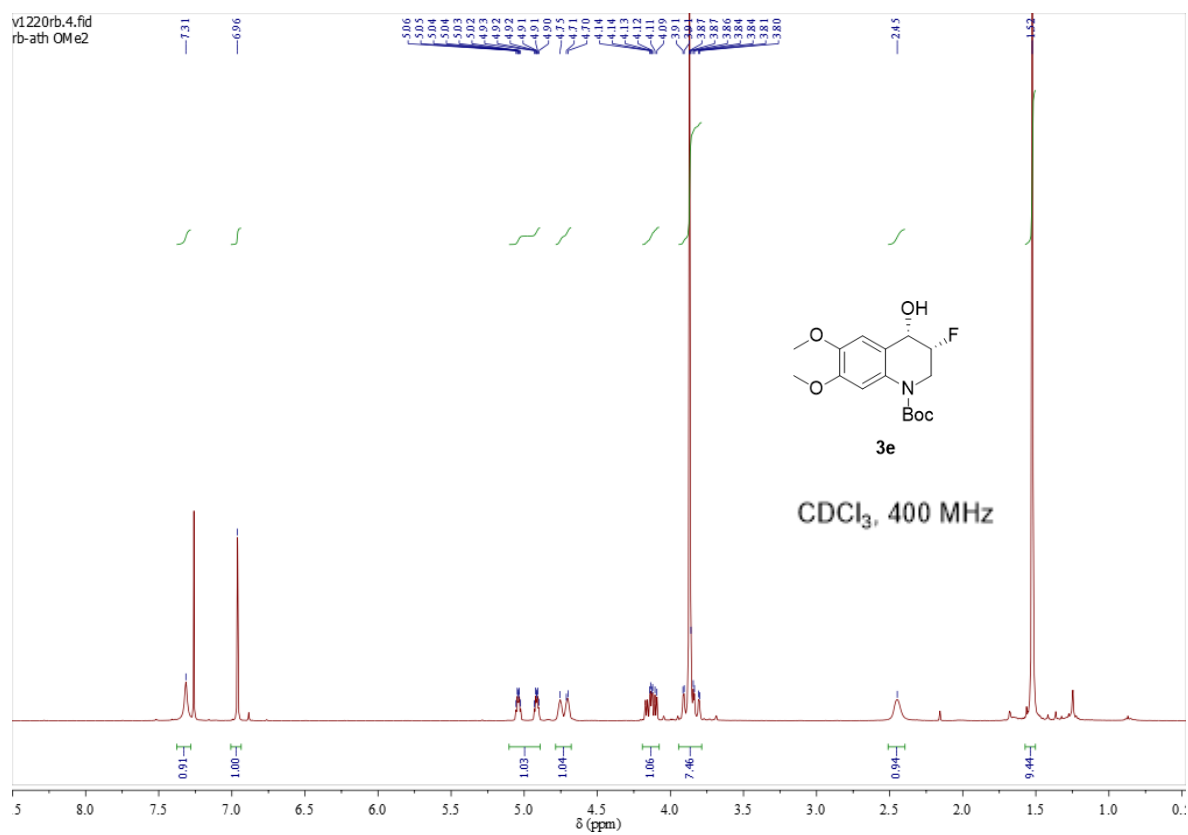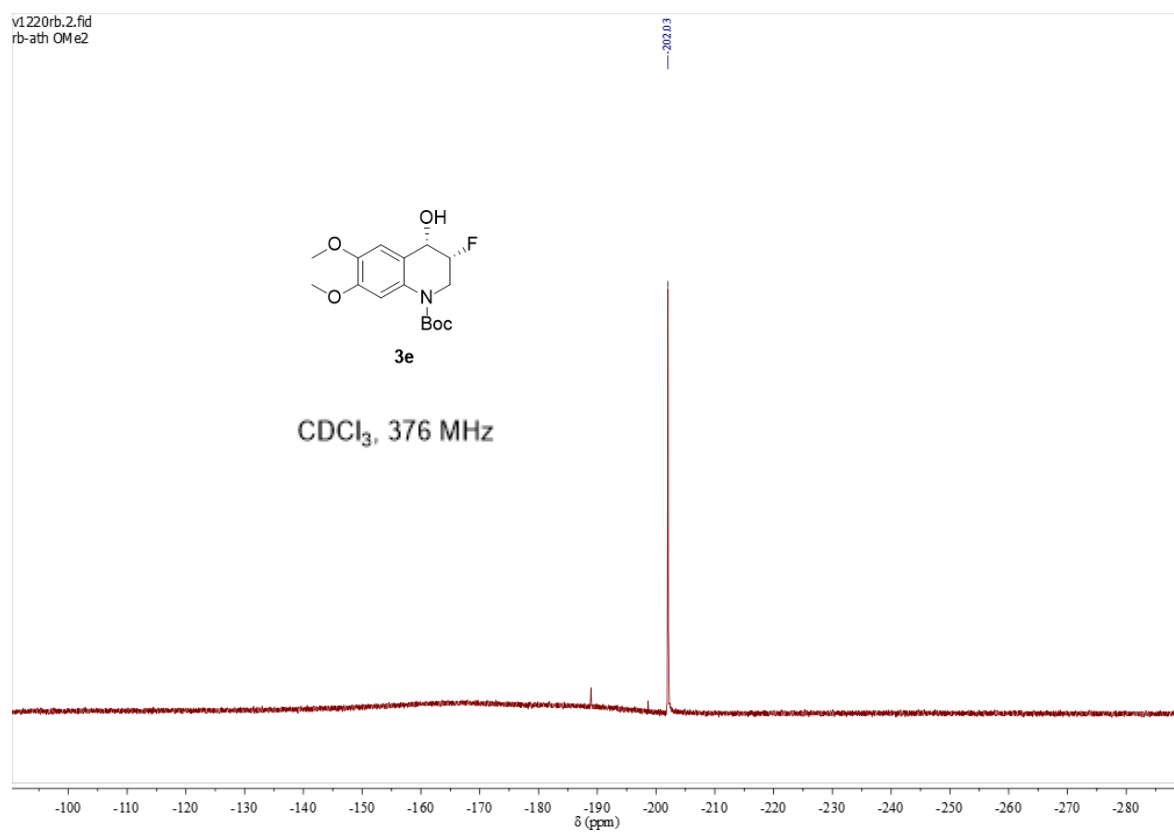

v1220rb  
rb-athome2

— 153.80  
— 146.49  
— 146.15

— 130.40

— 119.59

— 109.97  
— 107.48

— 89.05  
— 87.30  
— 81.72

— 67.67  
— 67.47

— 56.19  
— 56.09

— 46.01  
— 45.78

— 28.48

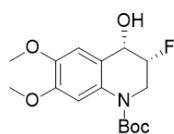

**3e**

CDCl<sub>3</sub>, 101 MHz

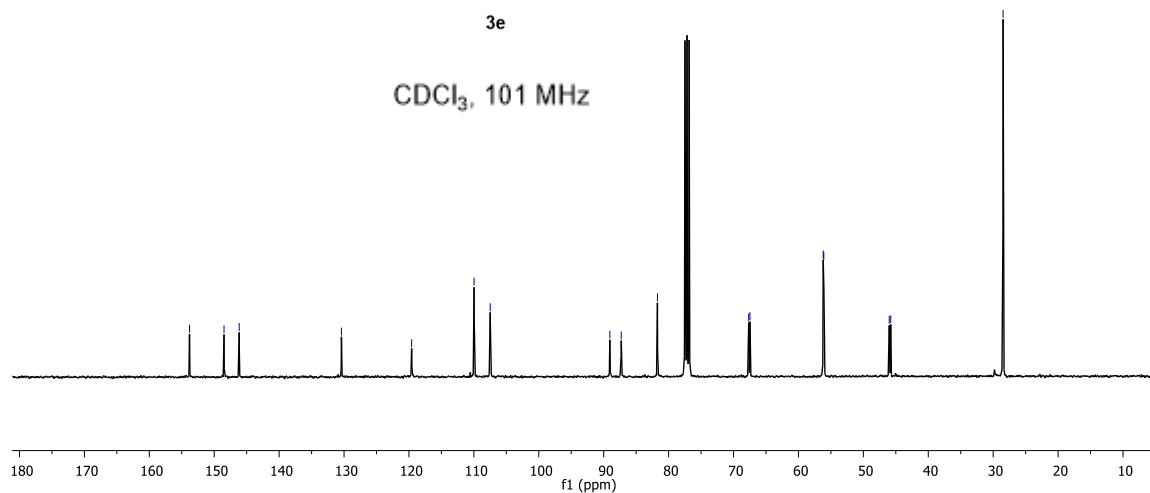

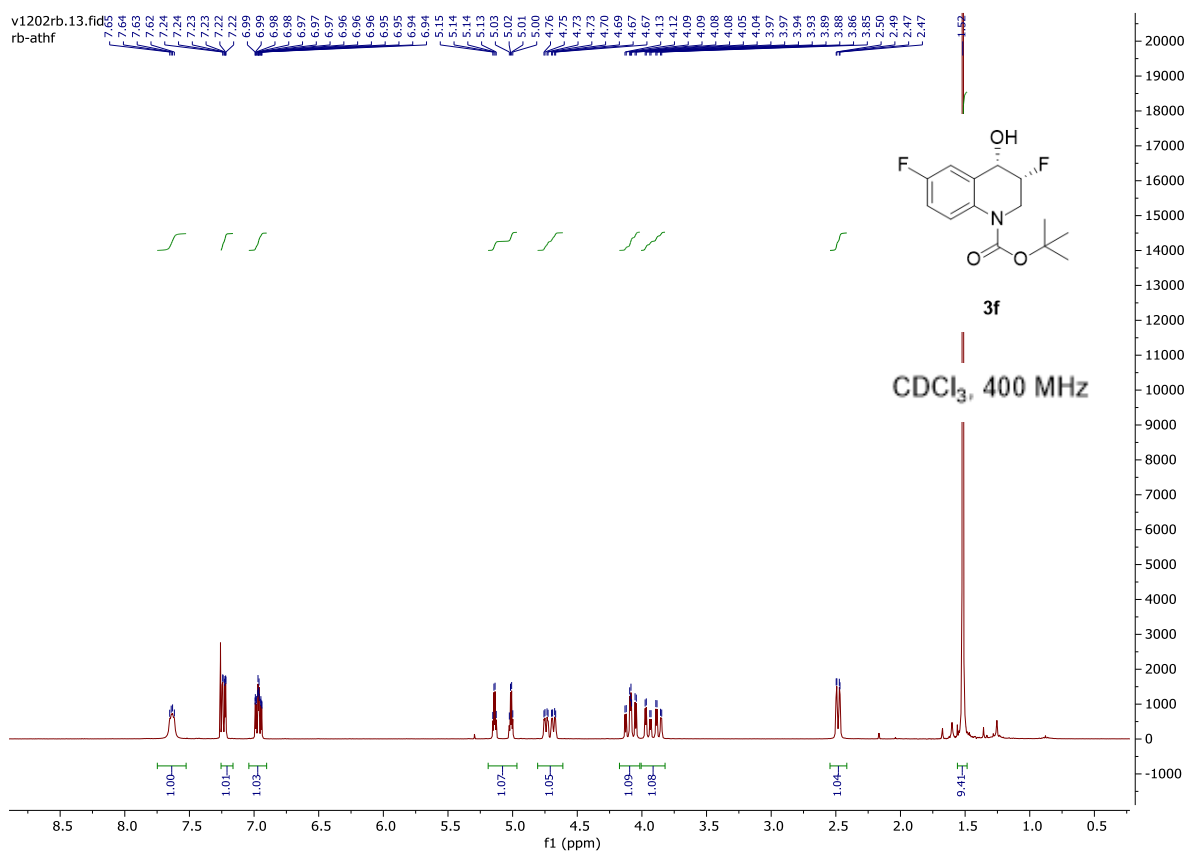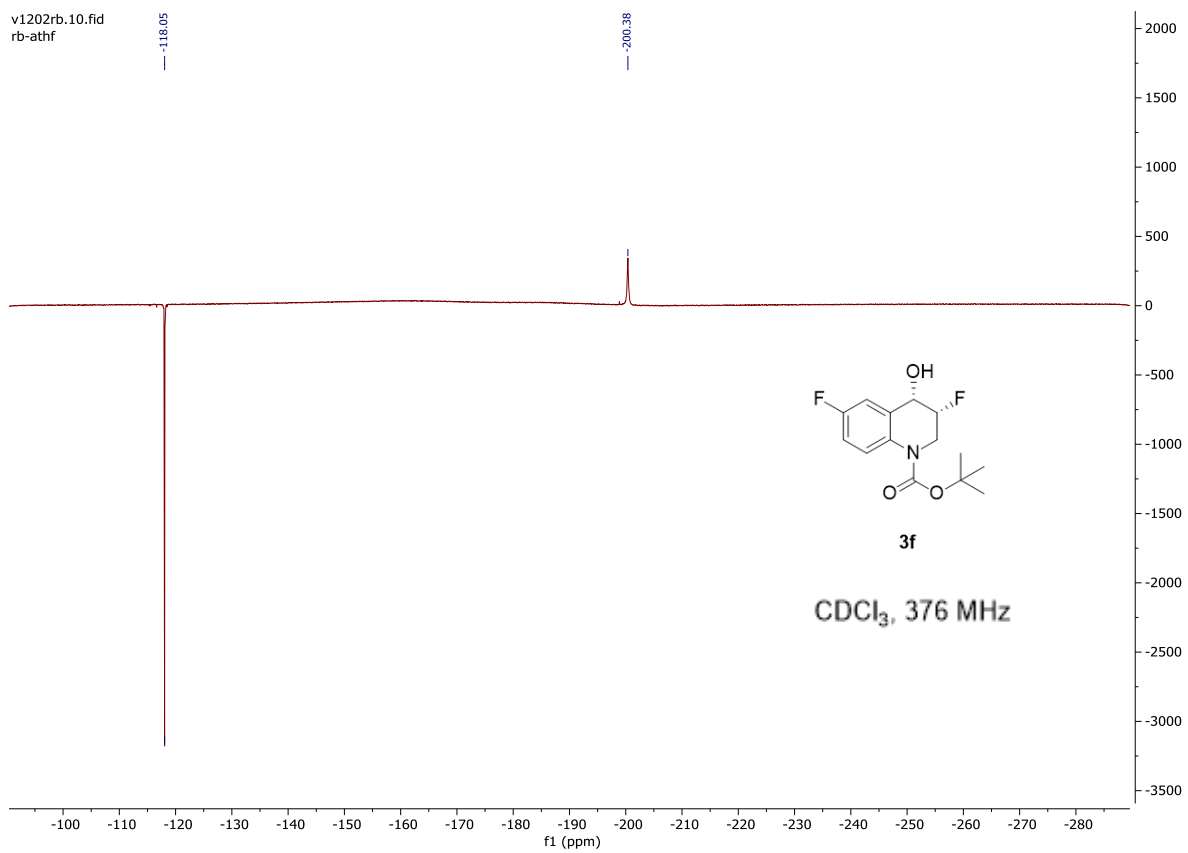



v1202rb.11.fid  
rb-athf

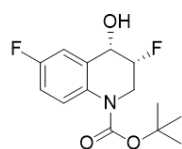

3f

CDCl<sub>3</sub>, 101 MHz

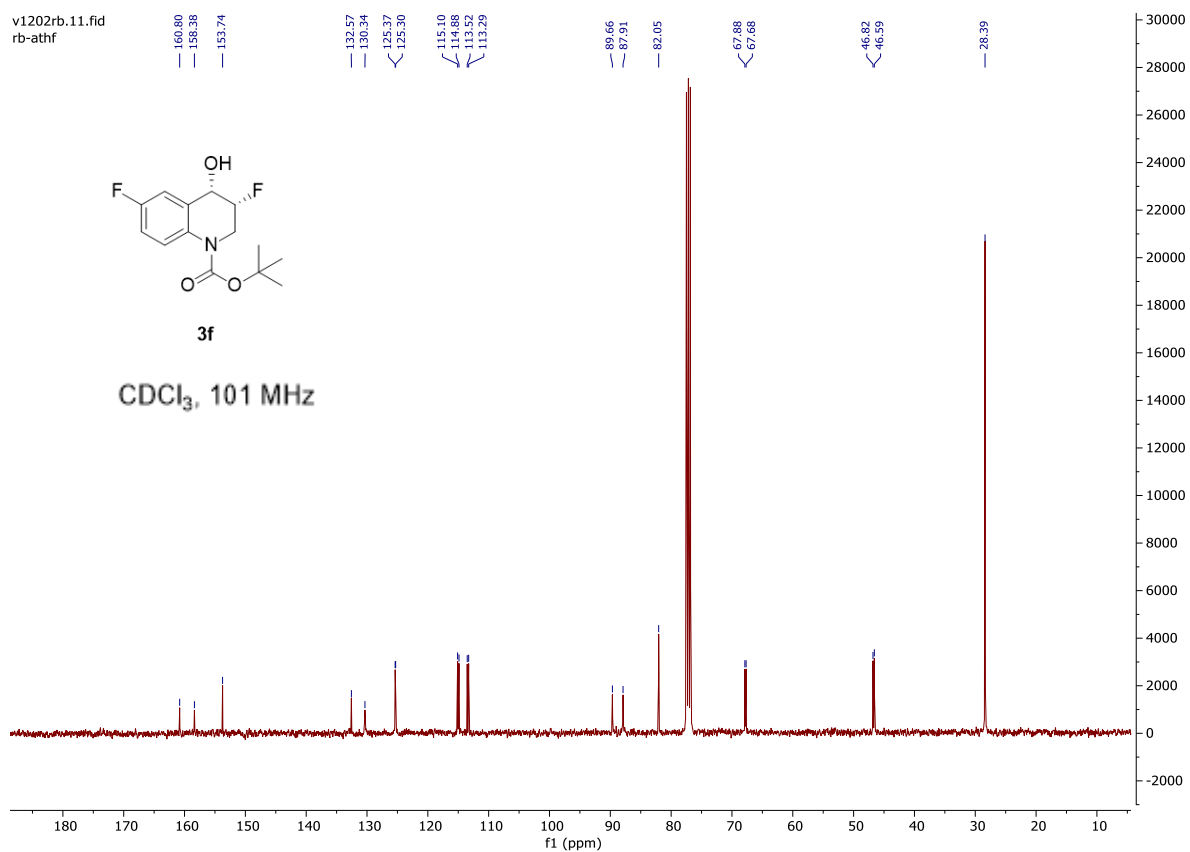

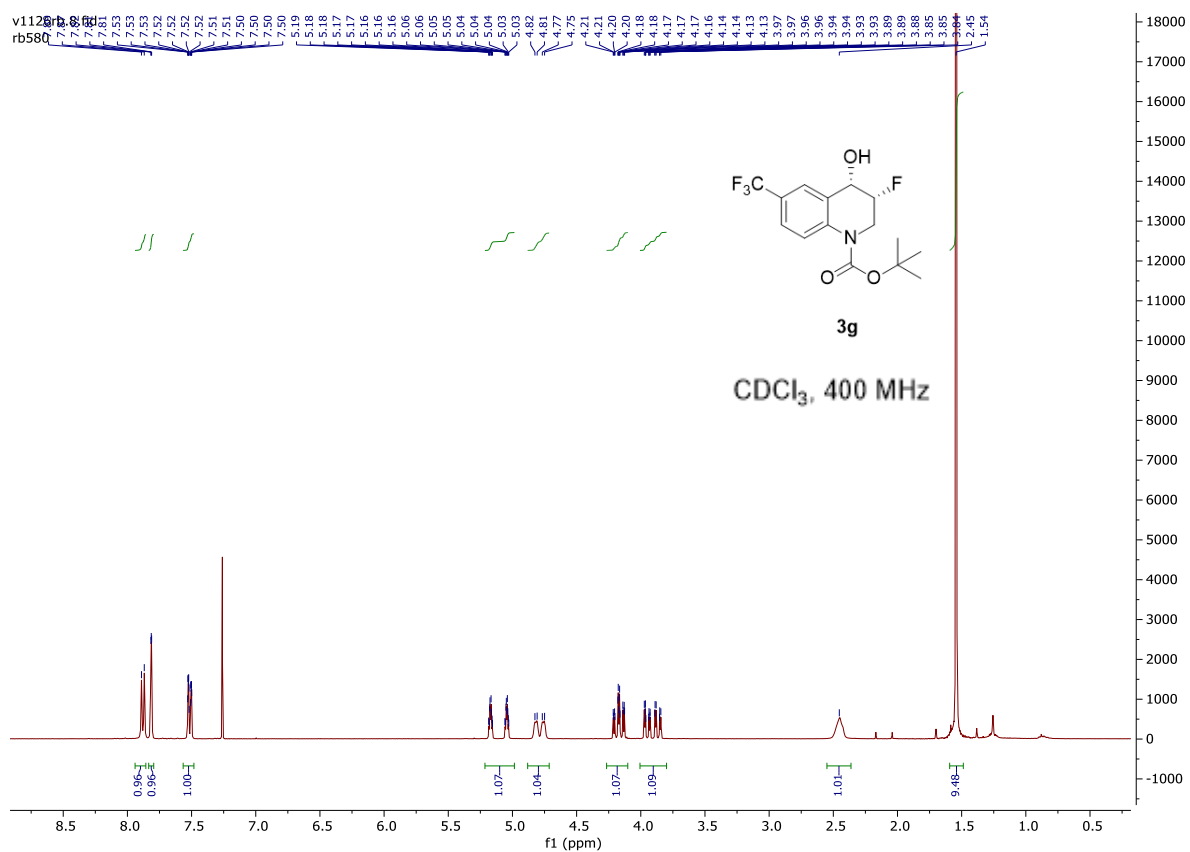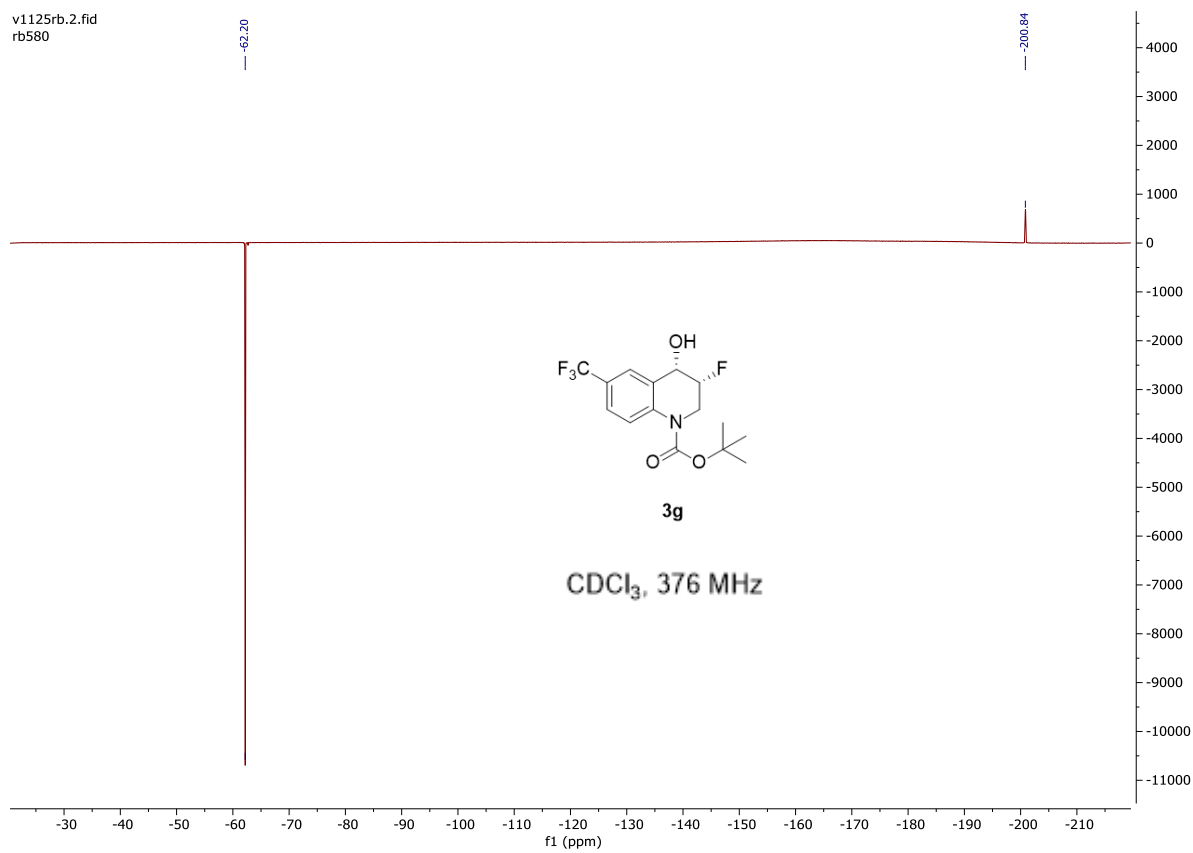

v1203rb.5.fid  
rb580

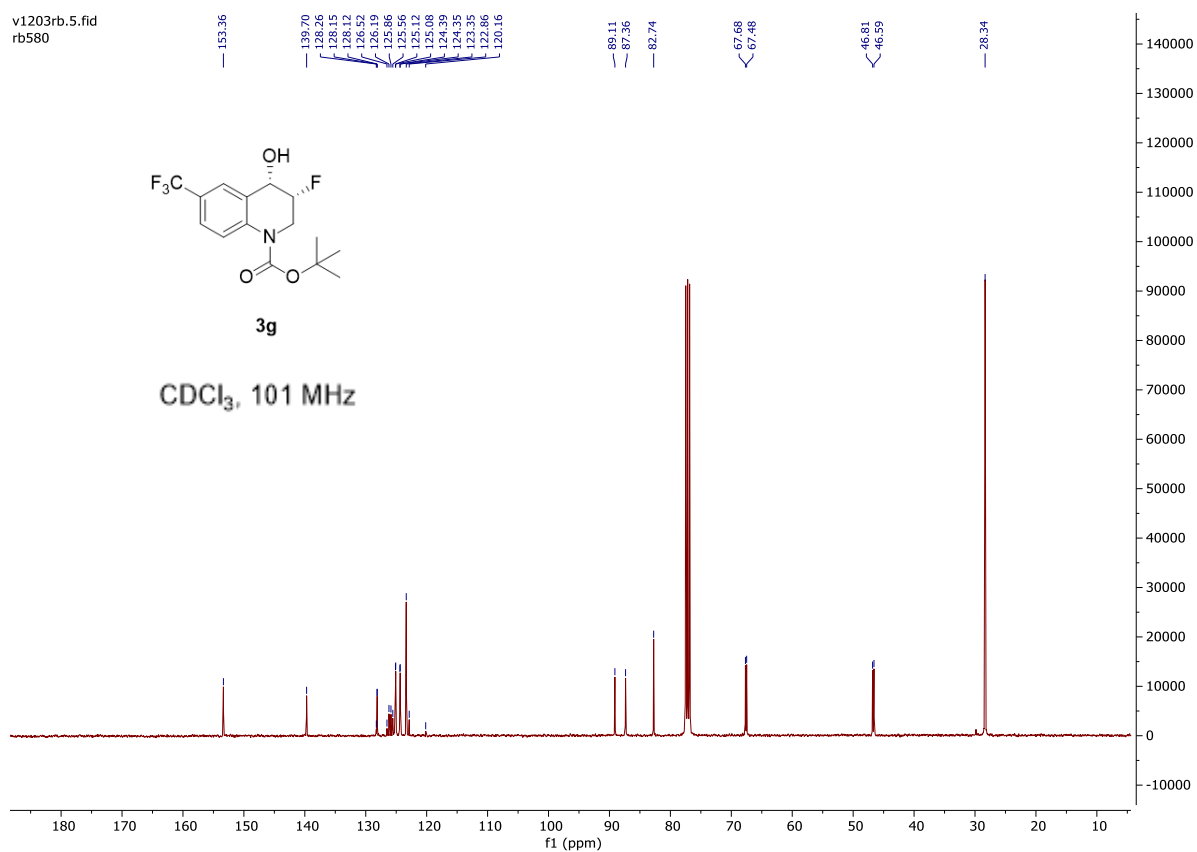

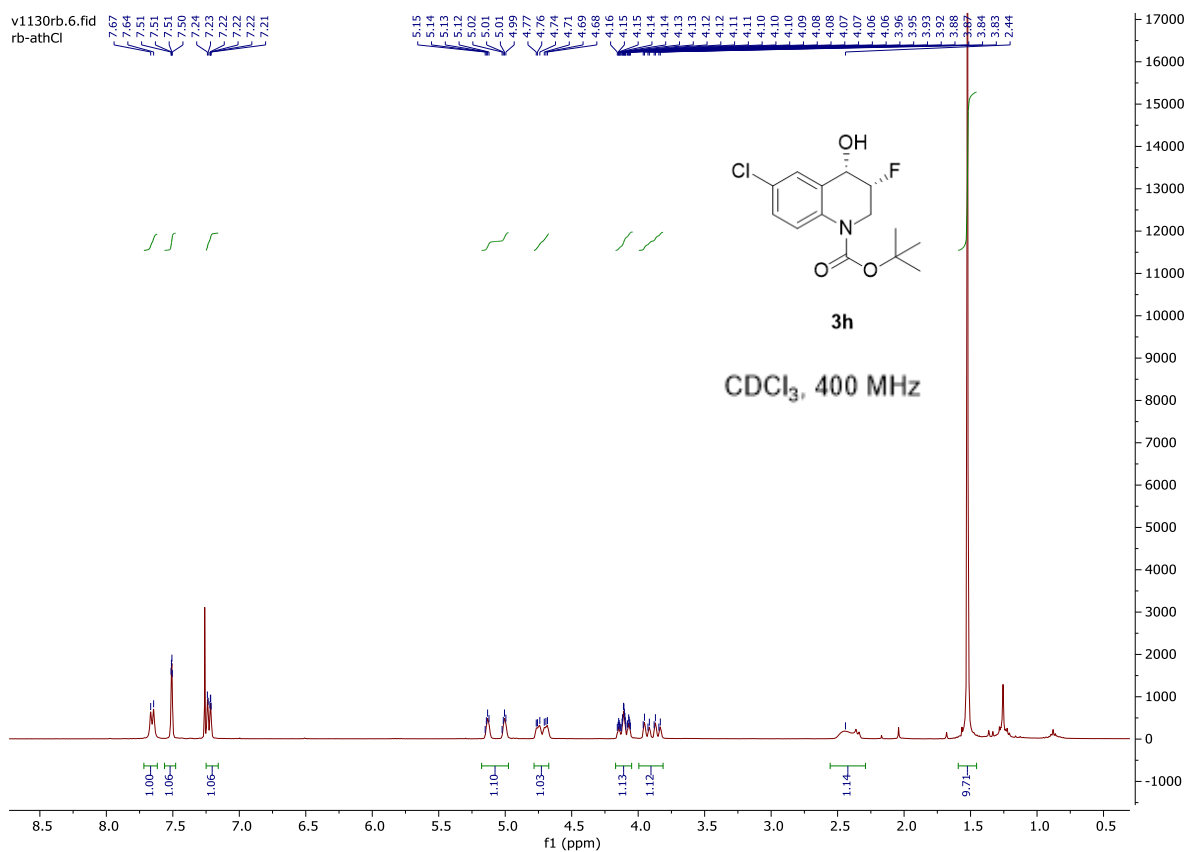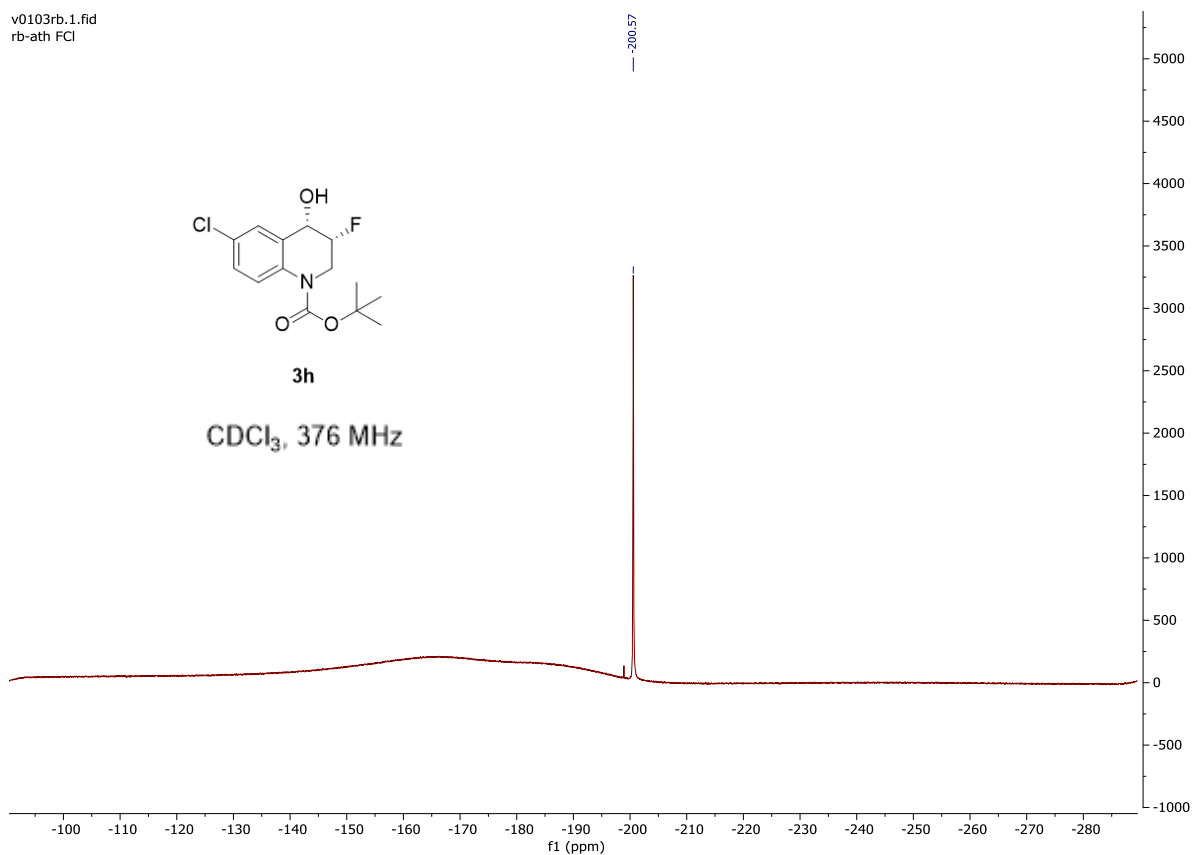

v1130rb.10.fid  
rb-athcl

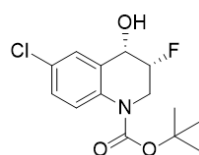

**3h**

CDCl<sub>3</sub>, 101 MHz

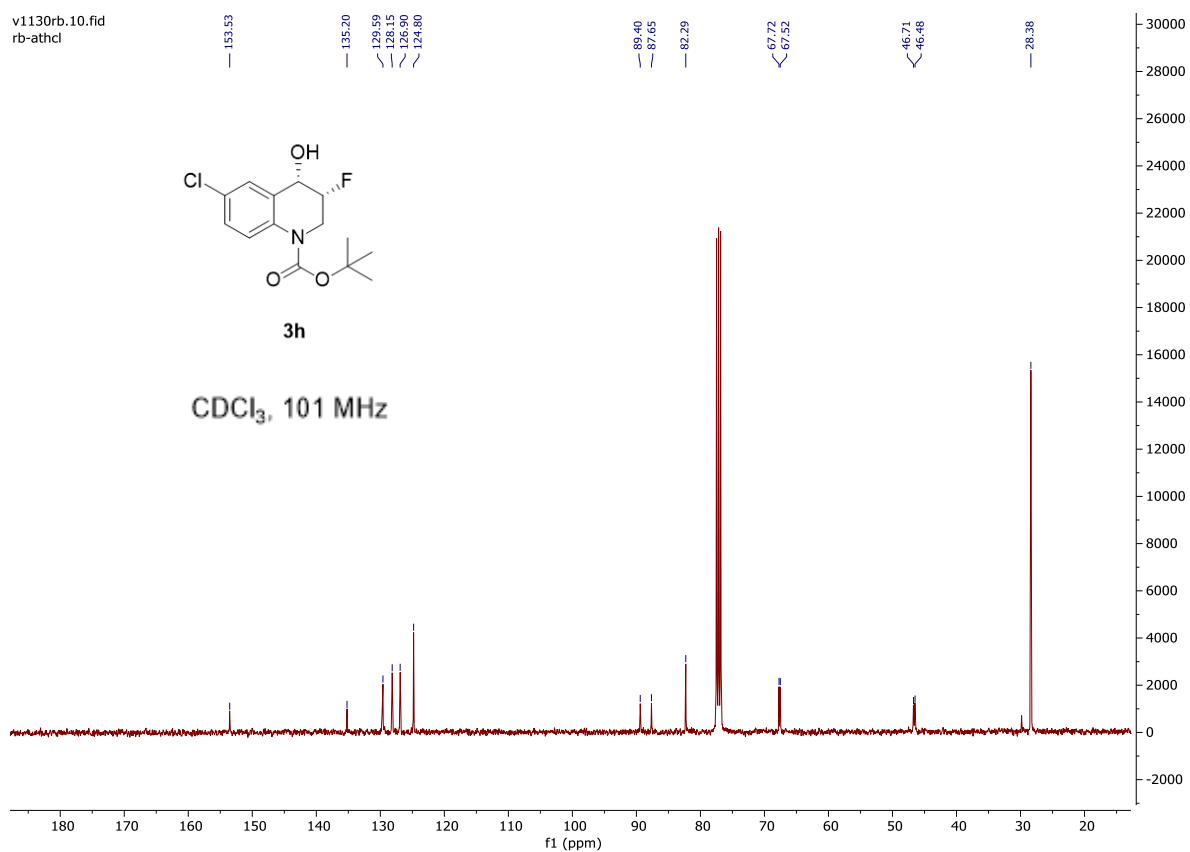

v1206rb.3.fid  
rb-athbr

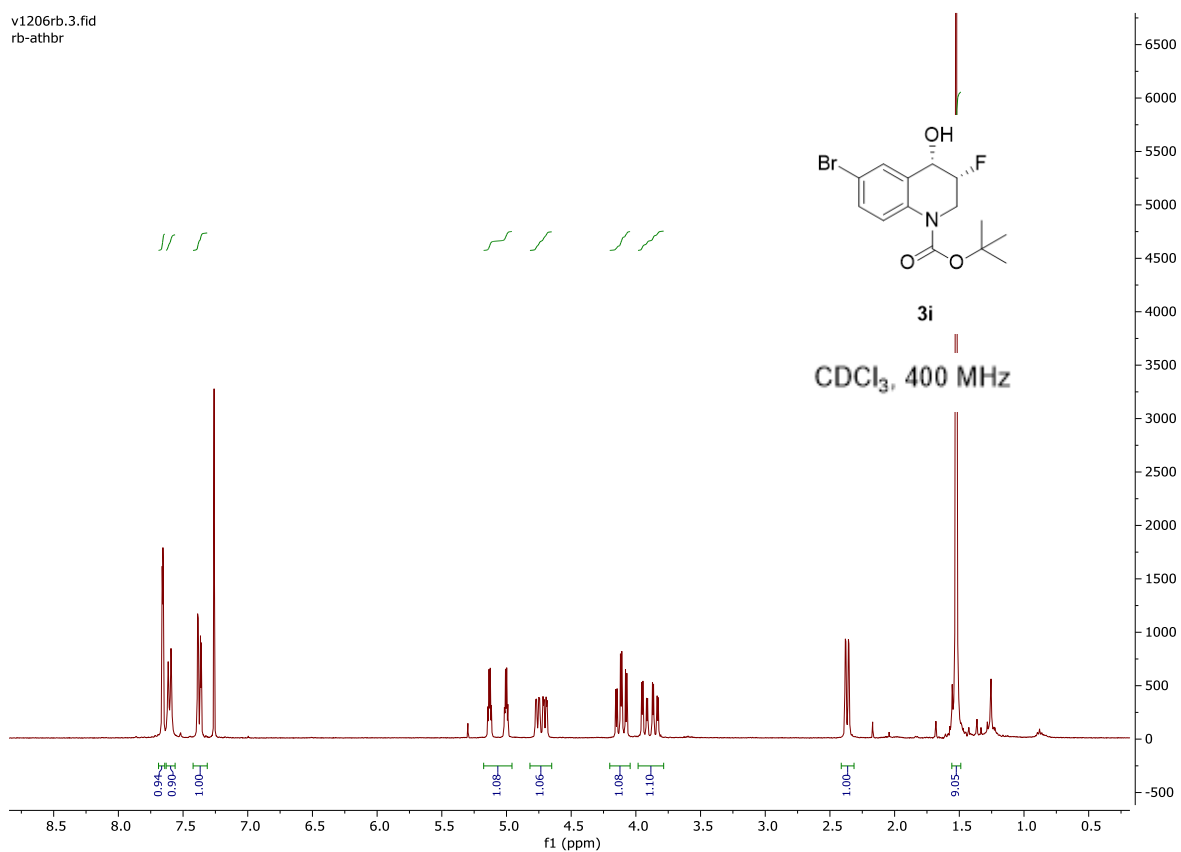

v1129rb.3.fid  
rb\_athbr

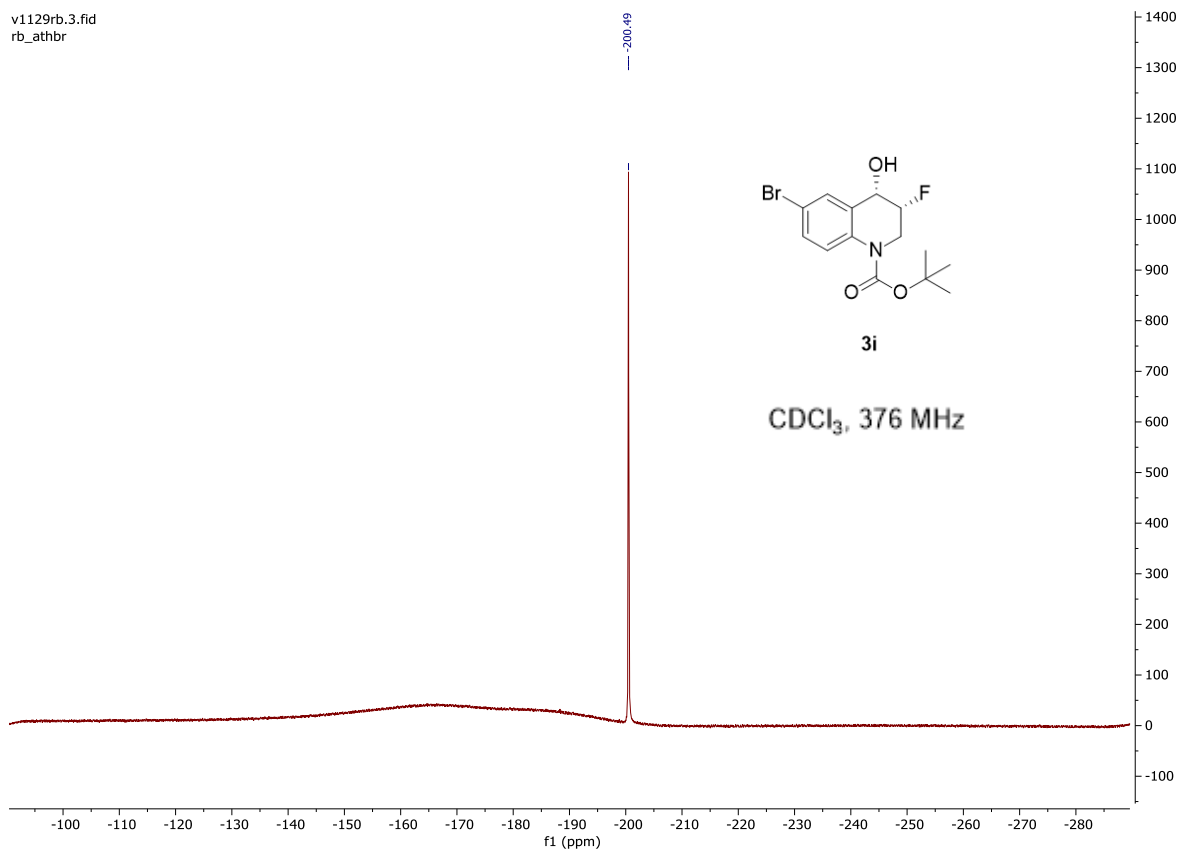

v1129rb.4.fid  
rb\_athbr

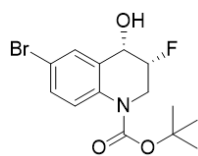

3i

CDCl<sub>3</sub>, 101 MHz

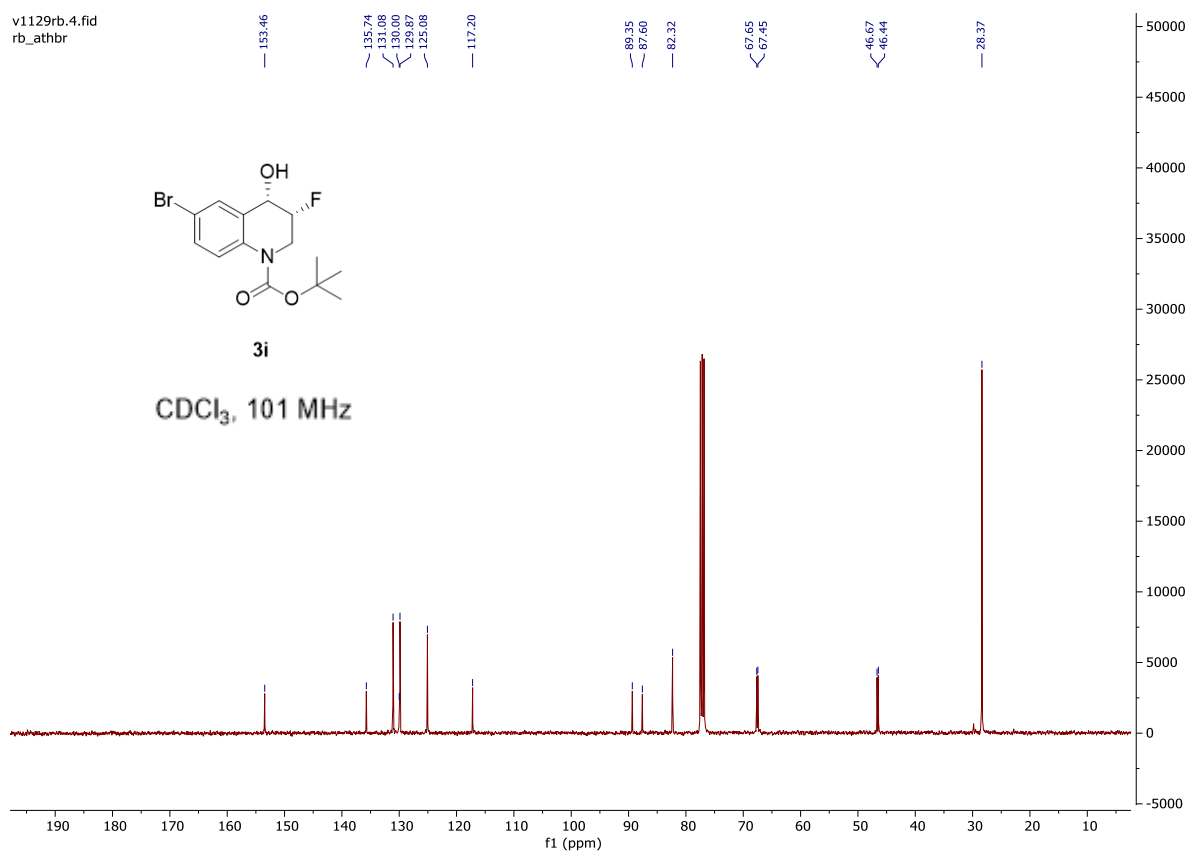

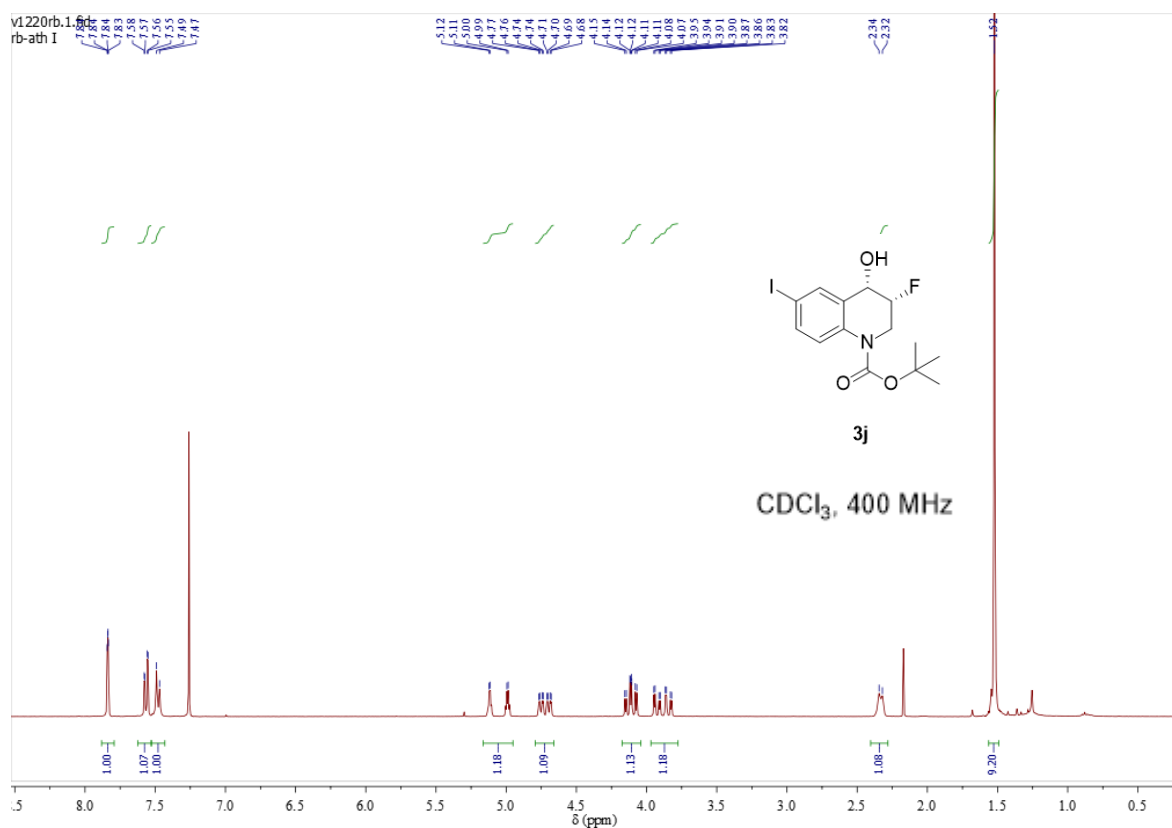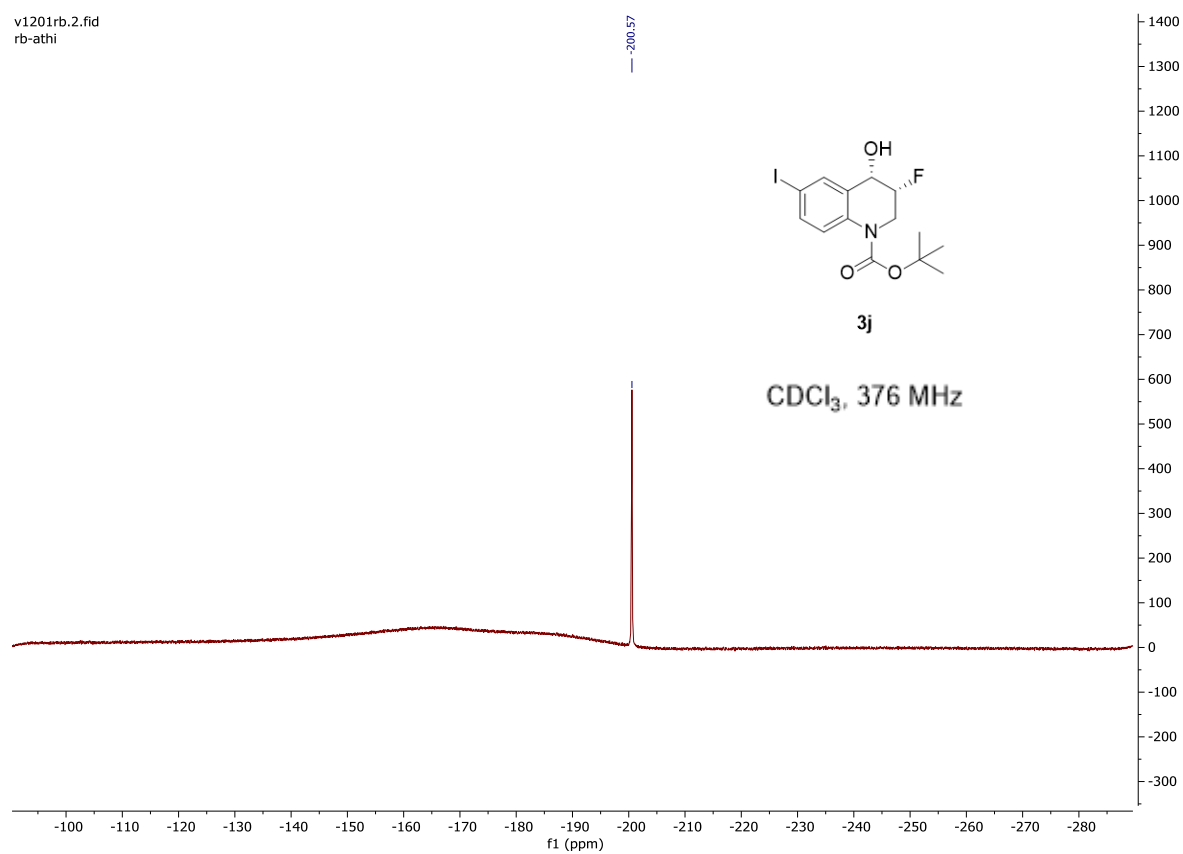



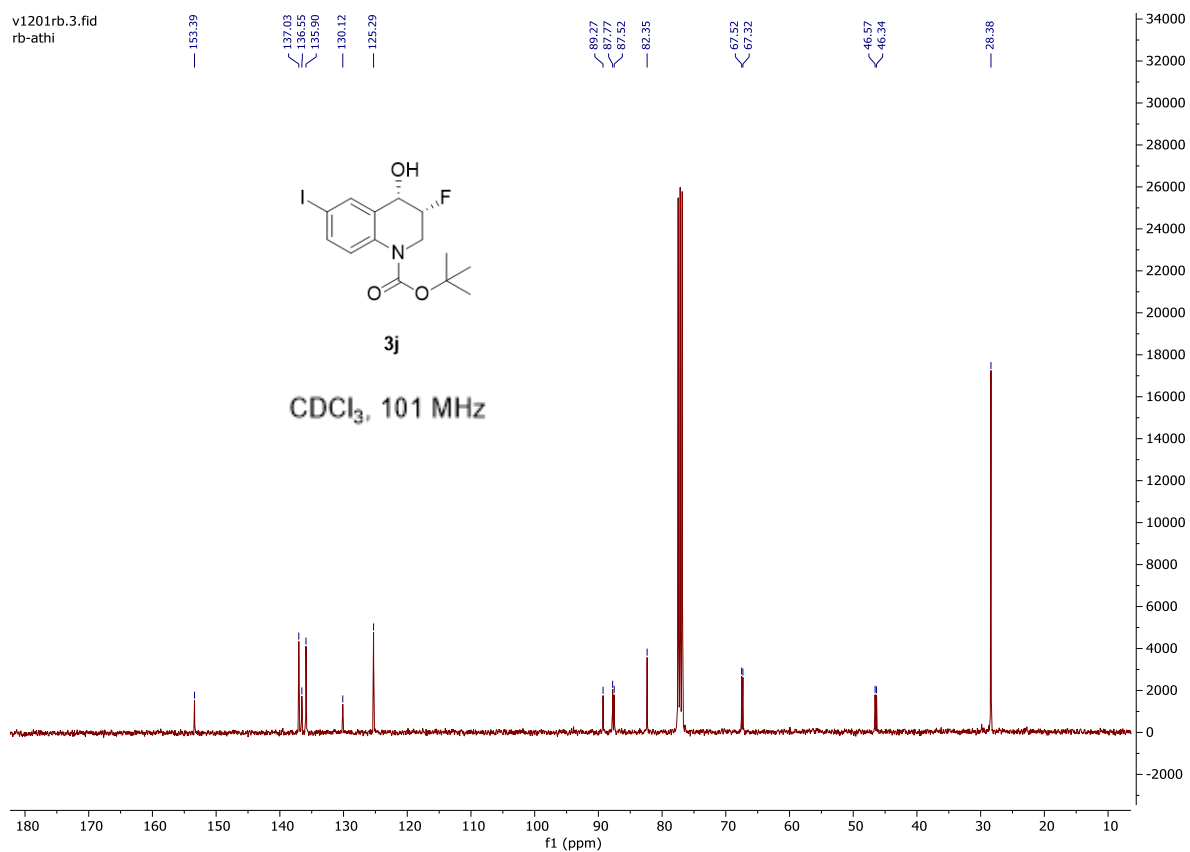

v0126rb.1.fid  
rb604

— 7.26 CDCl<sub>3</sub>

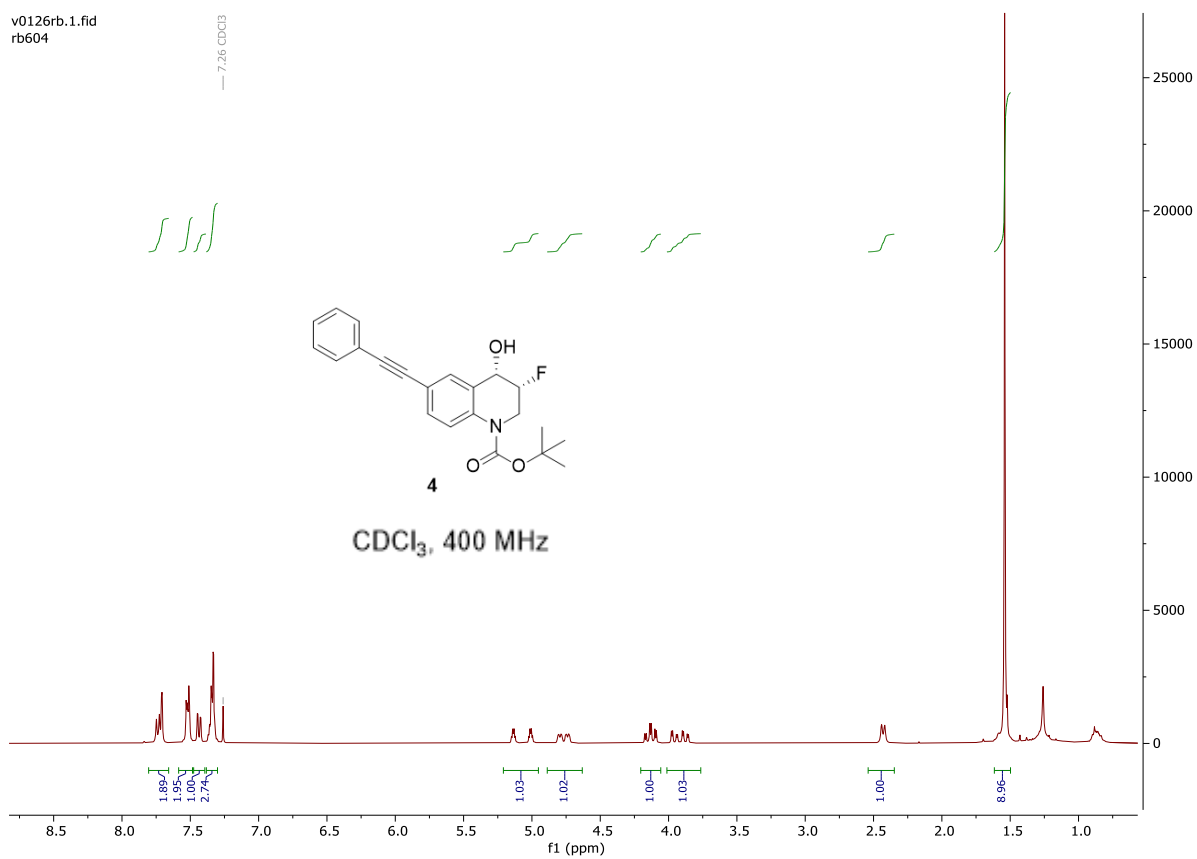

v0124rb.4.fid  
rb604

— -200.41

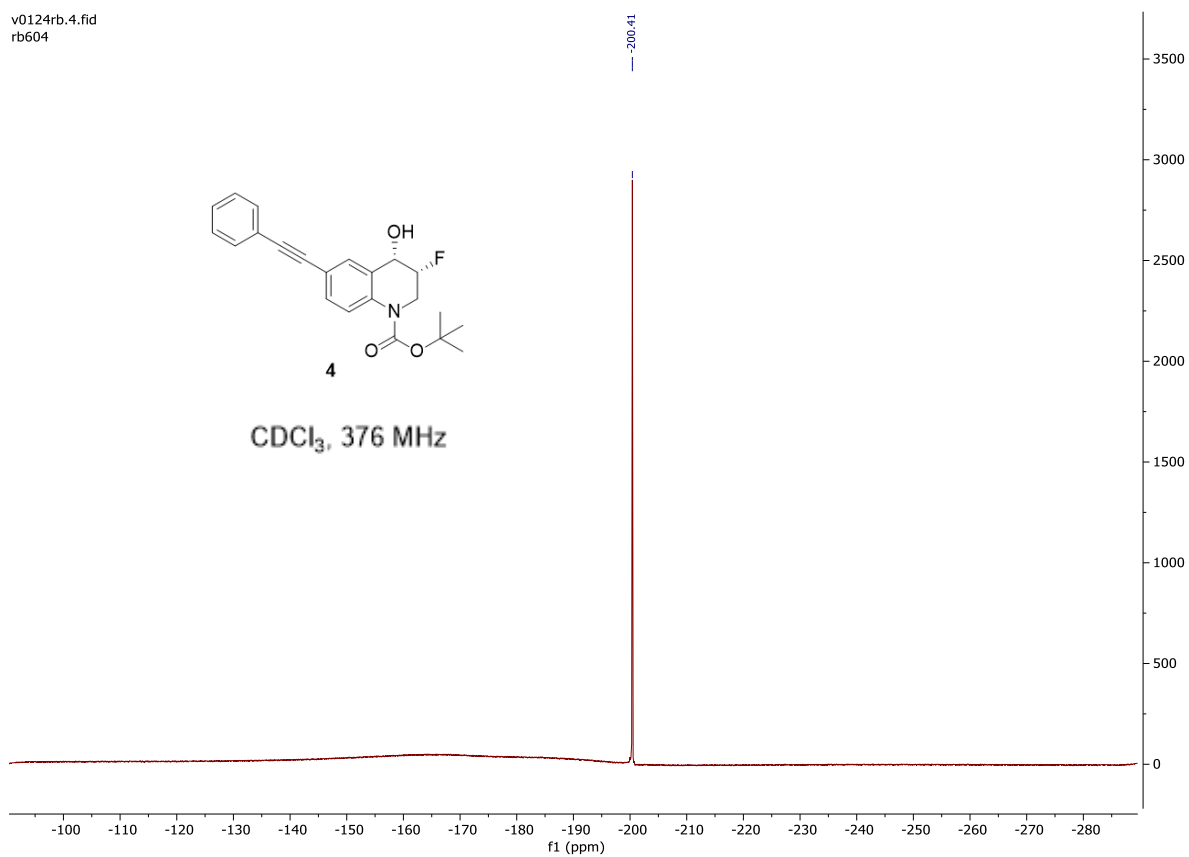

v0124rb.5.fid  
rb604

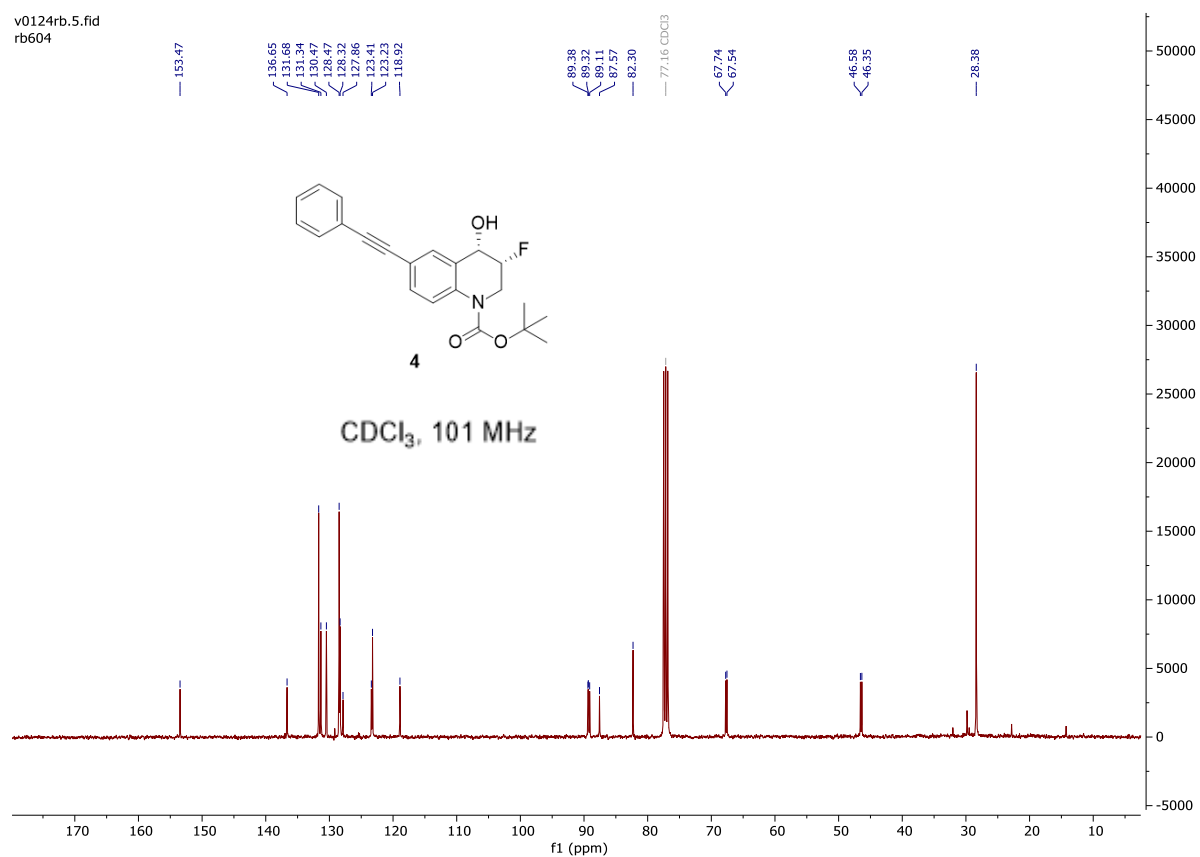

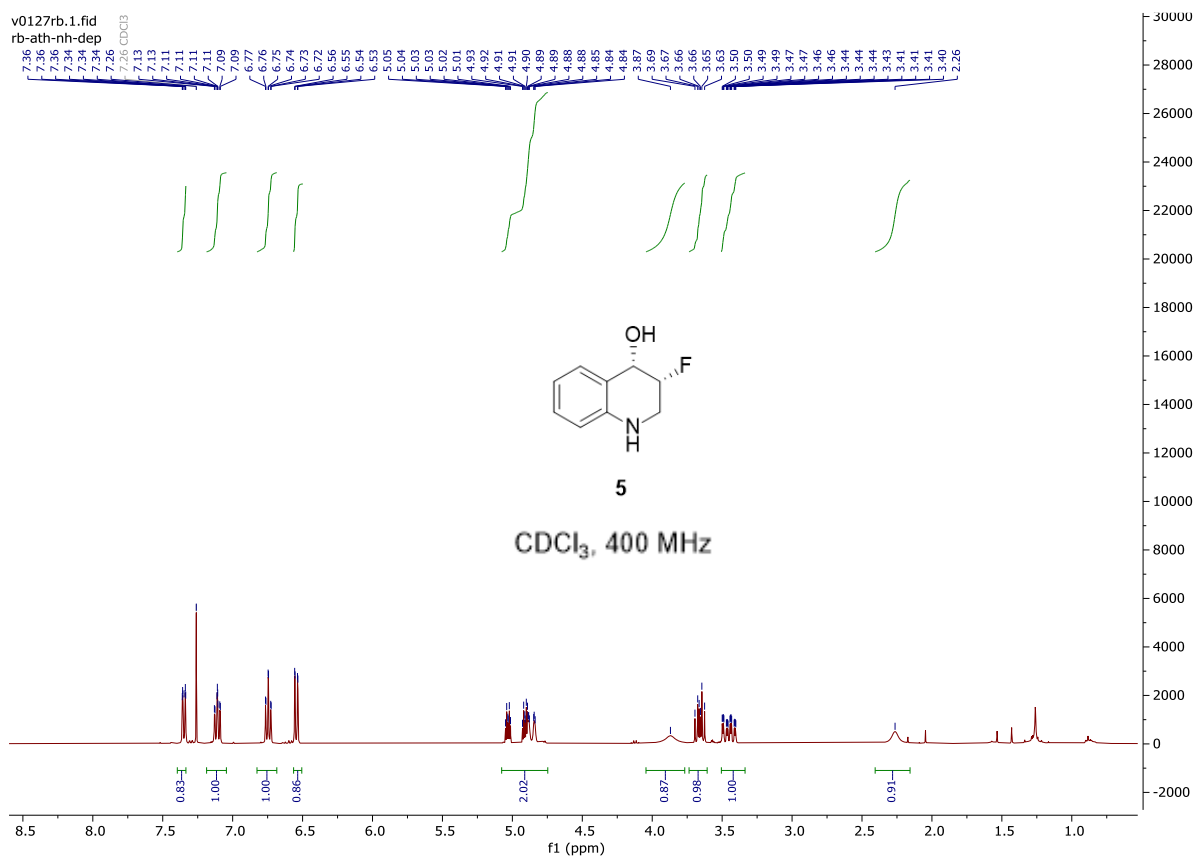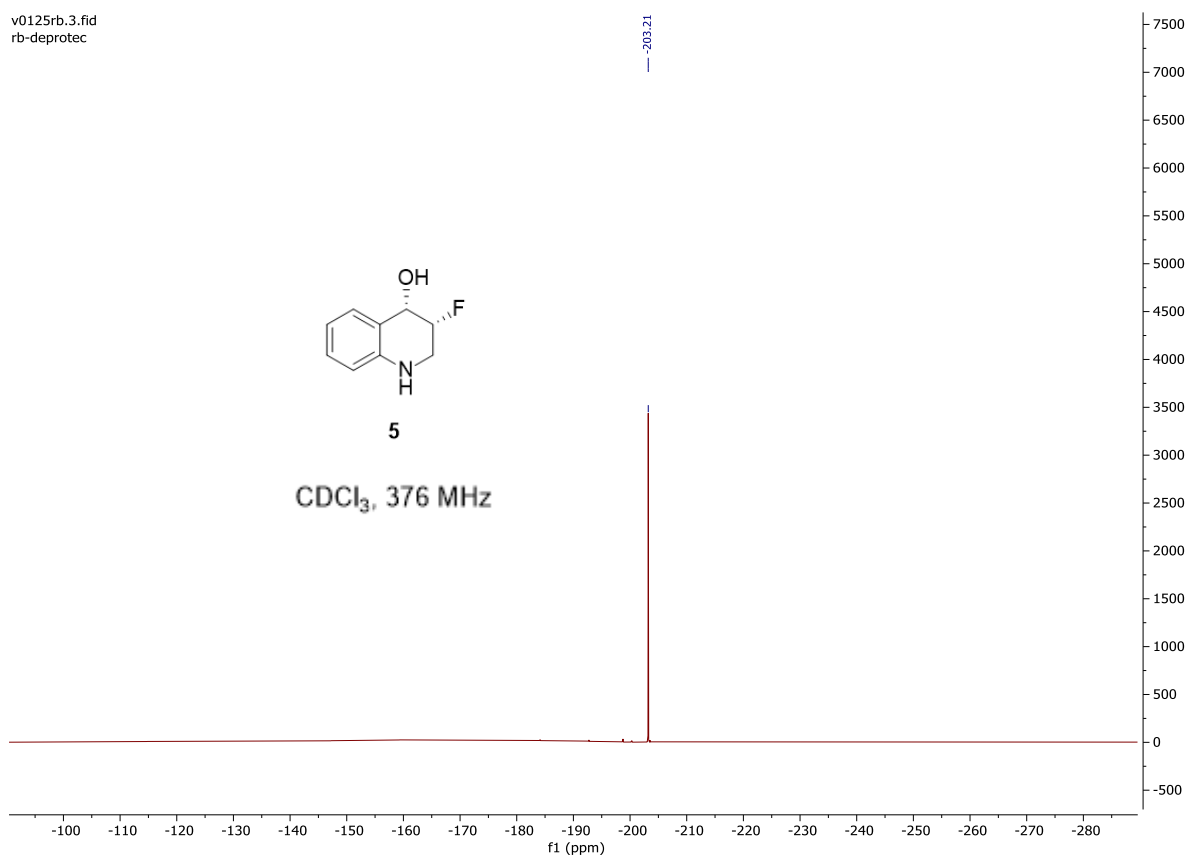

v0125rb.4.fid  
rb-deprotec

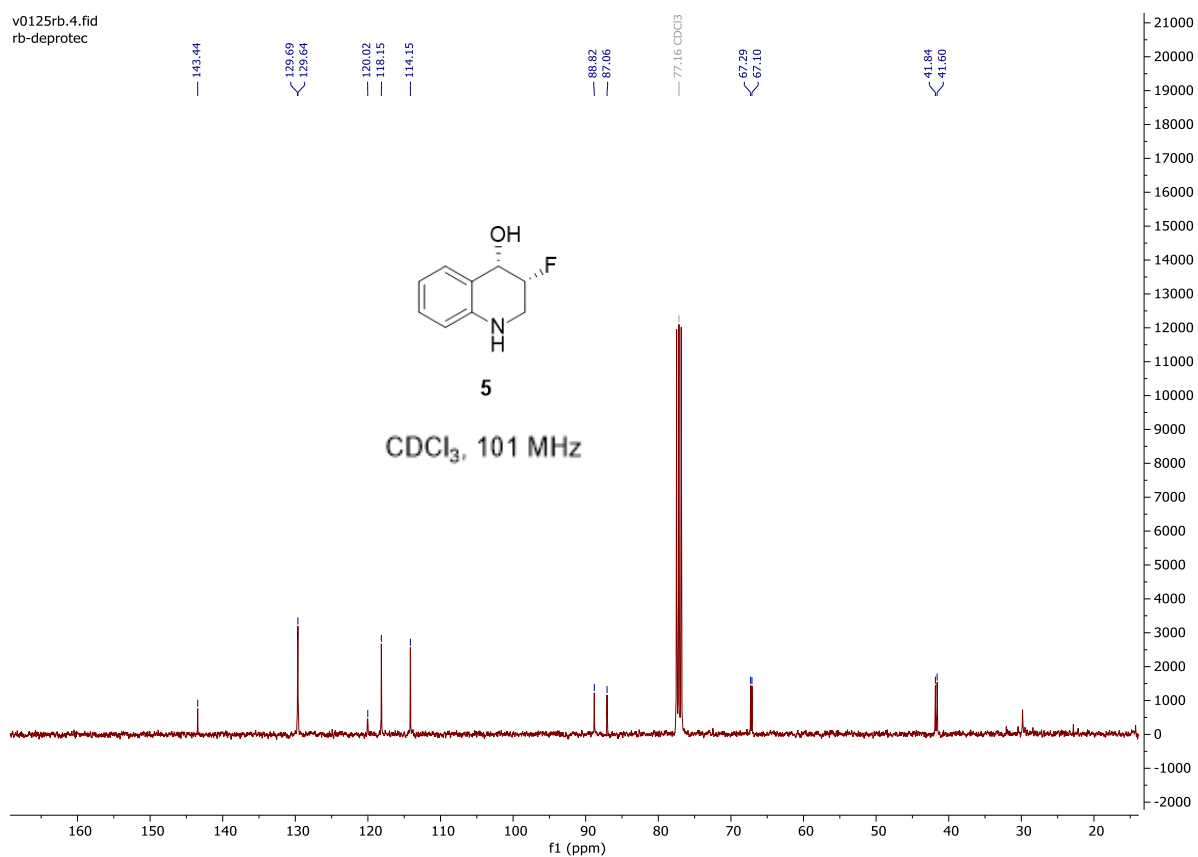

### 3) SFC Spectra

Sample Name

**RB rac  
NBocF Ph  
bis**

Injection Acq Method Name IE - 100 bars - 2 mL.min<sup>-1</sup> - 4% EtOH.amx

Injection Acquired Date 2021-12-08 15:21:40+01:00

| RT     | Peak Area % |
|--------|-------------|
| 11.036 | 18.63       |
| 12.848 | 18.59       |
| 14.535 | 31.45       |
| 15.432 | 31.33       |

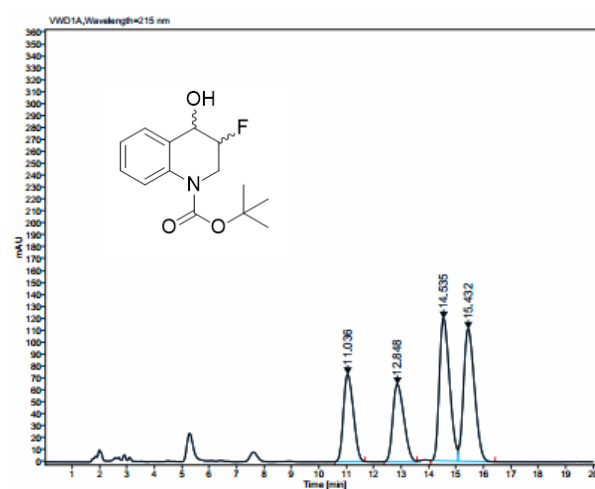

Sample Name

**RB ATH  
NBocF Ph**

Injection Acq Method Name IE - 100 bars - 2 mL.min<sup>-1</sup> - 4% EtOH.amx

Injection Acquired Date 2021-12-08 15:50:09+01:00

| RT     | Peak Area % |
|--------|-------------|
| 11.071 | 0.45        |
| 12.480 | 0.00        |
| 14.438 | 99.28       |
| 15.184 | 0.27        |

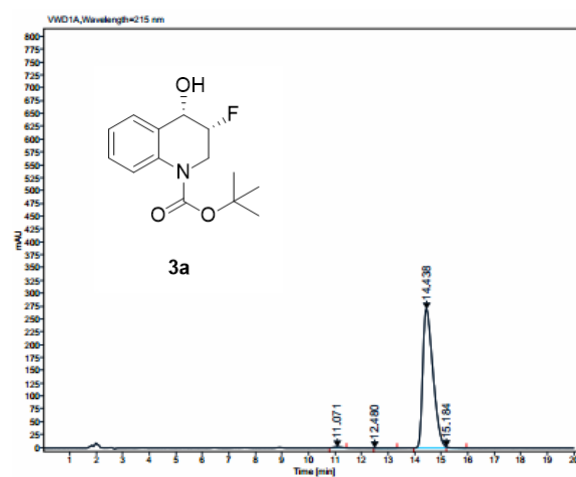

Sample Name

**RB rac  
NBoc F  
Me bis**

Injection Acq Method Name IE - 100 bars - 2 mL.min-1 - 2.5% EtOH.amx

Injection Acquired Date 2021-12-09 14:48:04+01:00

| RT     | Peak Area % |
|--------|-------------|
| 27.713 | 9.08        |
| 32.433 | 40.92       |
| 37.477 | 40.98       |
| 42.406 | 9.03        |

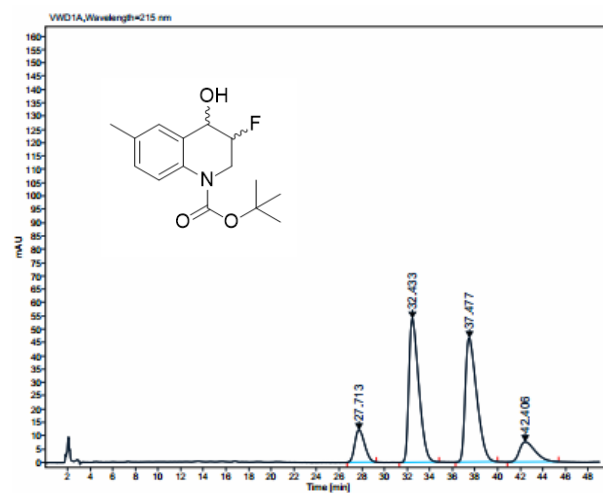

Sample Name

**RB ATH  
NBoc F  
Me**

Injection Acq Method Name IE - 100 bars - 2 mL.min-1 - 2.5% EtOH.amx

Injection Acquired Date 2021-12-09 16:00:08+01:00

| RT     | Peak Area % |
|--------|-------------|
| 27.799 | 1.40        |
| 32.000 | 98.40       |
| 37.932 | 0.18        |
| 42.626 | 0.01        |

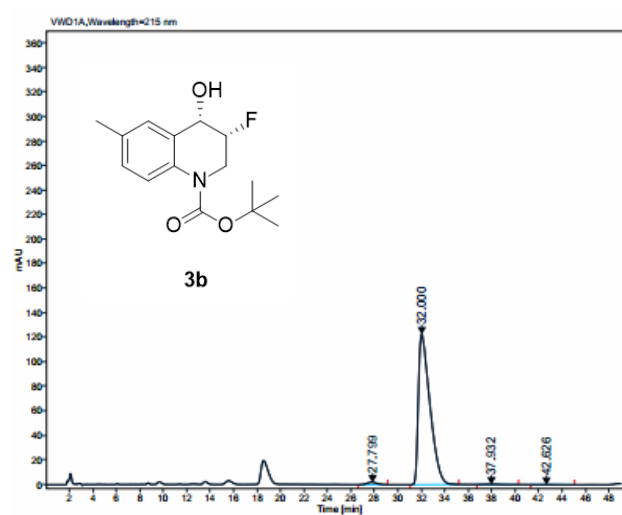

Sample Name **RB rac  
NBoc F  
OMe haut**

Injection Acq Method Name IF - 100 bars - 2 mL.min-1 - 4.5% EtOH.amx

Injection Acquired Date 2021-12-10 15:44:50+01:00

| RT     | Peak Area % |
|--------|-------------|
| 15.708 | 3.91        |
| 17.111 | 46.09       |
| 18.688 | 3.92        |
| 22.785 | 46.08       |

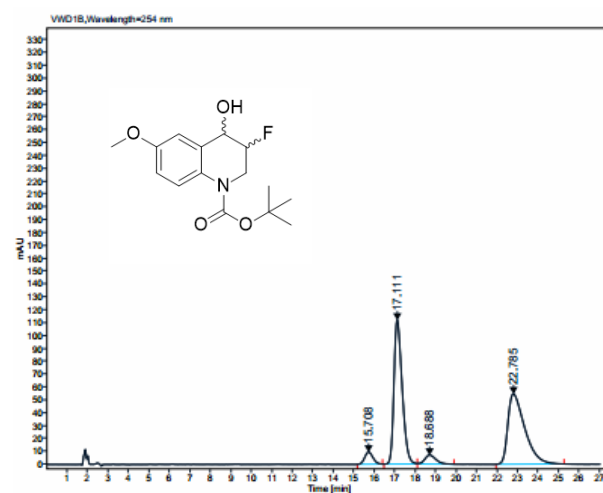

Sample Name **RB ATH  
NBoc F  
OMe haut**

Injection Acq Method Name IF - 100 bars - 2 mL.min-1 - 4.5% EtOH.amx

Injection Acquired Date 2021-12-10 16:21:59+01:00

| RT     | Peak Area % |
|--------|-------------|
| 15.641 | 0.57        |
| 17.188 | 0.18        |
| 18.549 | 0.00        |
| 22.652 | 99.25       |

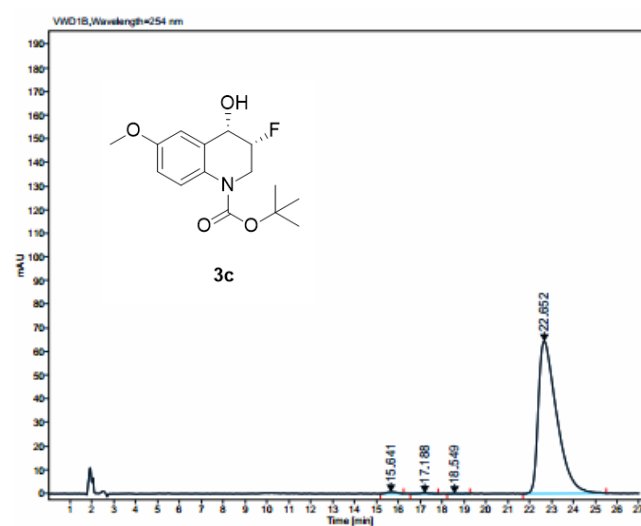



Sample Name

**RB rac**  
**NBoc F**  
**OMe bas**

Injection Acq Method Name IE - 100 bars - 2 mL.min-1 - 5% EtOH.amx

Injection Acquired Date 2021-12-13 15:53:19+01:00

| RT     | Peak Area % |
|--------|-------------|
| 11.865 | 3.60        |
| 13.190 | 3.59        |
| 16.628 | 46.44       |
| 18.621 | 46.37       |

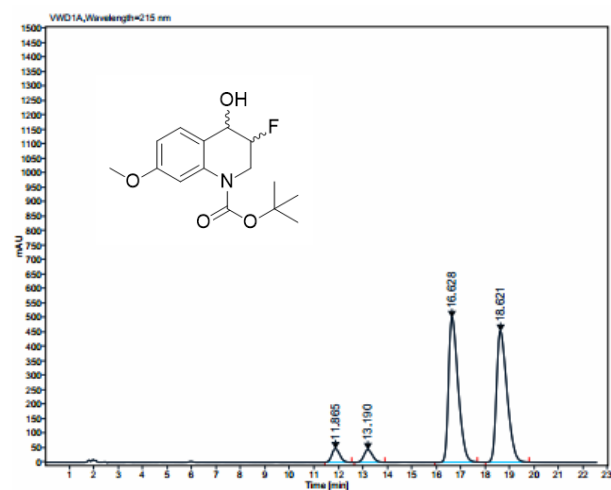

Sample Name

**RB ATH**  
**NBoc F**  
**OMe bas**

Injection Acq Method Name IE - 100 bars - 2 mL.min-1 - 5% EtOH.amx

Injection Acquired Date 2021-12-13 18:46:24+01:00

| RT     | Peak Area % |
|--------|-------------|
| 11.792 | 4.92        |
| 13.079 | 0.01        |
| 16.442 | 94.88       |
| 18.740 | 0.20        |

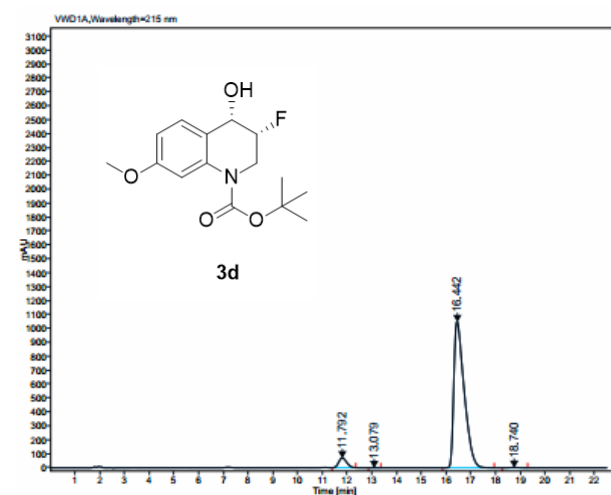

Sample Name

**RB rac  
NBoc F  
OMe2 bis**

Injection Acq Method Name IF - 100 bars - 2 mL.min-1 - 5% EtOH.amx

Injection Acquired Date 2021-12-13 13:32:06+01:00

| RT     | Peak Area % |
|--------|-------------|
| 14.751 | 5.02        |
| 15.894 | 5.01        |
| 17.454 | 44.97       |
| 19.068 | 44.99       |

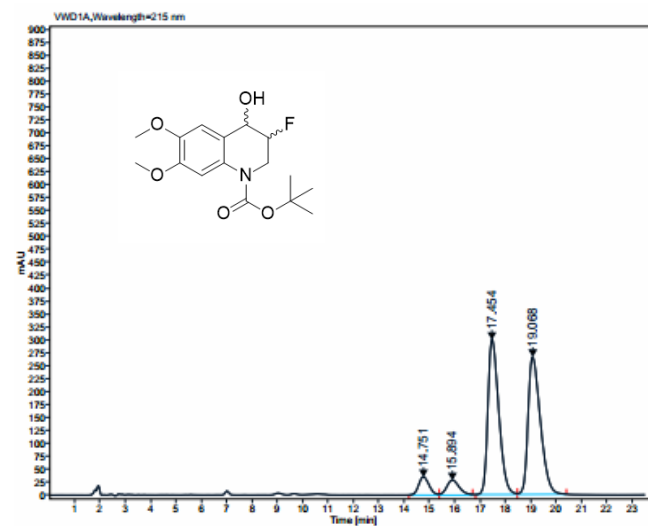

Sample Name

**RB ATH  
NBoc F  
OMe2**

Injection Acq Method Name IF - 100 bars - 2 mL.min-1 - 5% EtOH.amx

Injection Acquired Date 2021-12-13 14:15:27+01:00

| RT     | Peak Area % |
|--------|-------------|
| 14.742 | 4.50        |
| 15.864 | 0.16        |
| 17.321 | 94.90       |
| 19.238 | 0.45        |

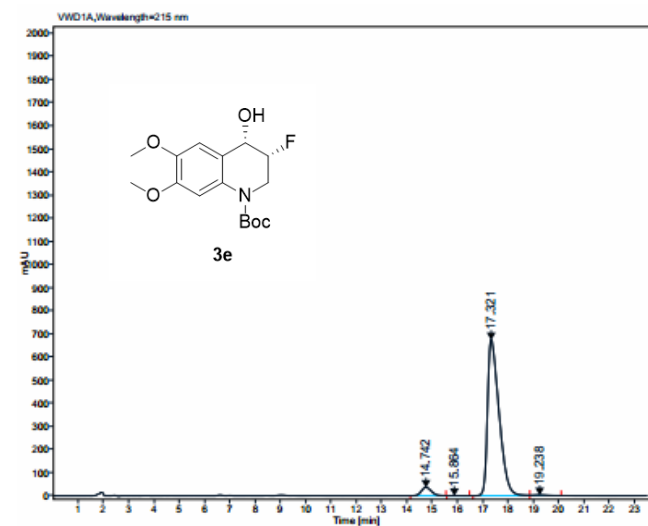

Sample Name

**RB rac  
NBocF F**

Injection Acq Method Name IE - 100 bars - 2 mL.min-1 - 6% MeOH.amx

Injection Acquired Date 2021-12-07 13:07:33+01:00

| RT    | Peak Area % |
|-------|-------------|
| 4.499 | 5.69        |
| 4.959 | 5.58        |
| 6.438 | 44.30       |
| 6.999 | 44.43       |

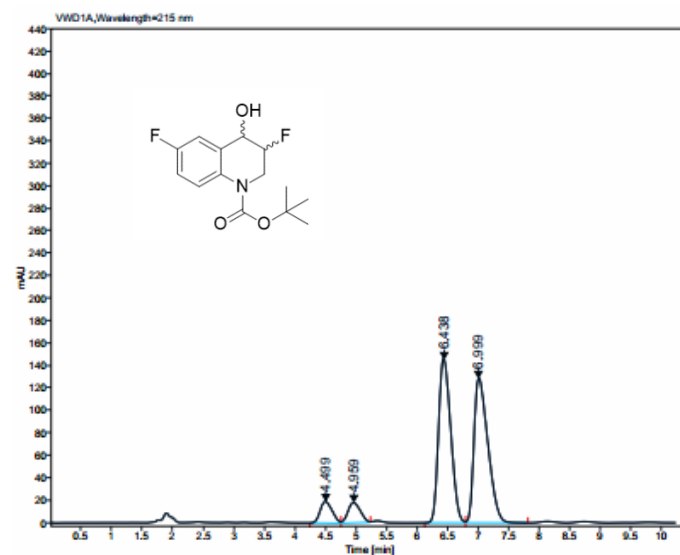

Sample Name

**RB ATH  
NBocF F**

Injection Acq Method Name IE - 100 bars - 2 mL.min-1 - 6% MeOH.amx

Injection Acquired Date 2021-12-07 13:42:07+01:00

| RT    | Peak Area % |
|-------|-------------|
| 4.468 | 0.04        |
| 5.024 | 0.00        |
| 6.451 | 0.25        |
| 6.921 | 99.70       |

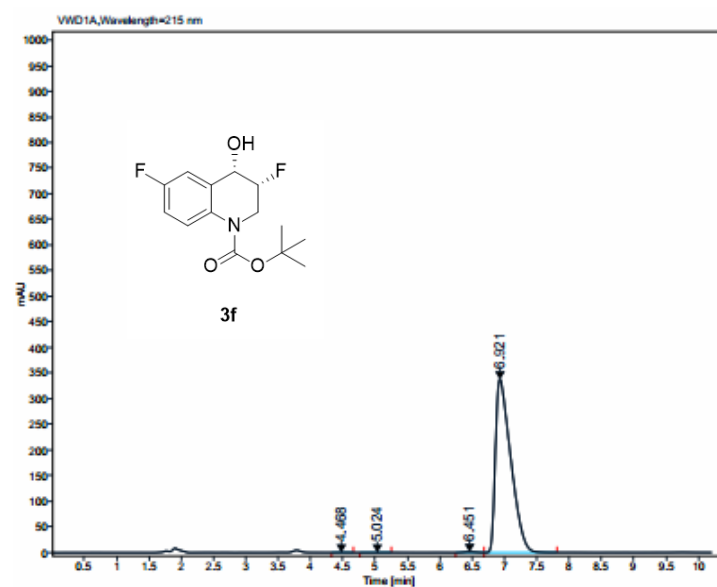

Sample Name

**RB rac  
NBoc F  
CF3 2**

Injection Acq Method Name IF - 100 bars - 2 mL.min-1 - 4% EtOH.amx

Injection Acquired Date 2021-12-10 17:44:38+01:00

| RT    | Peak Area % |
|-------|-------------|
| 5.677 | 49.32       |
| 6.839 | 49.36       |
| 8.525 | 1.33        |

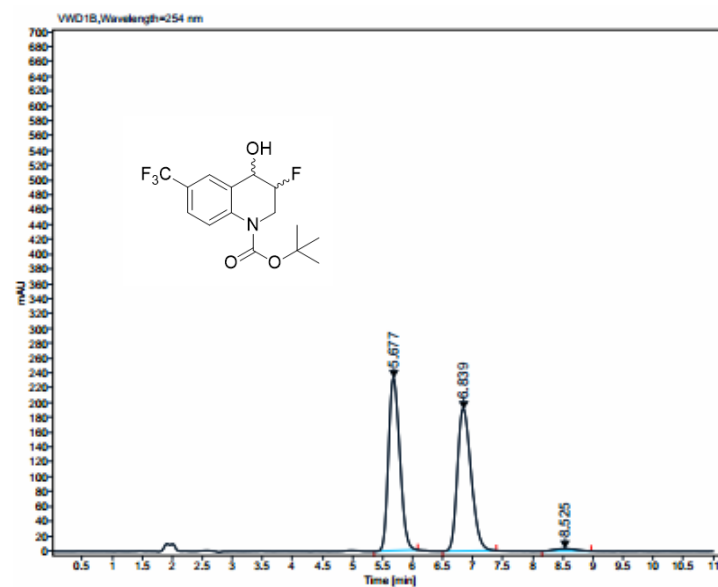

Sample Name

**RB ATH  
NBoc F  
CF3**

Injection Acq Method Name IF - 100 bars - 2 mL.min-1 - 4% EtOH.amx

Injection Acquired Date 2021-12-10 18:17:50+01:00

| RT    | Peak Area % |
|-------|-------------|
| 5.643 | 99.75       |
| 6.847 | 0.14        |
| 8.411 | 0.10        |

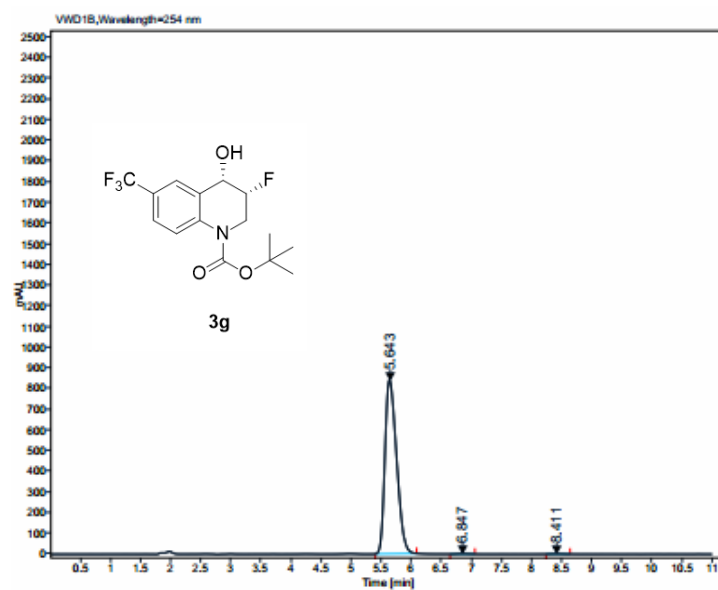

Sample Name

**RB rac  
NBocF Cl**

Injection Acq Method Name IE - 100 bars - 2 mL.min-1 - 6% MeOH.amx

Injection Acquired Date 2021-12-07 10:39:45+01:00

| RT     | Peak Area % |
|--------|-------------|
| 6.952  | 5.27        |
| 7.489  | 5.32        |
| 10.308 | 44.65       |
| 11.028 | 44.76       |

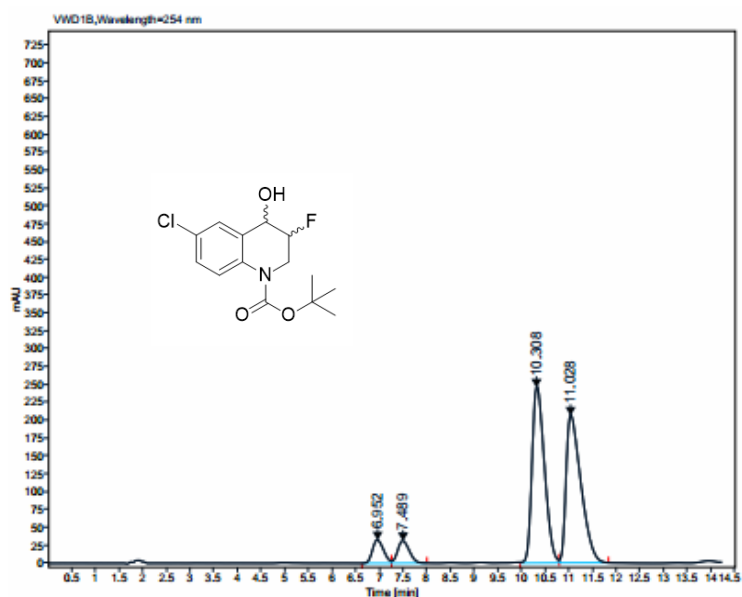

Sample Name

**RB ATH  
NBocF Cl**

Injection Acq Method Name IE - 100 bars - 2 mL.min-1 - 6% MeOH.amx

Injection Acquired Date 2021-12-07 11:10:45+01:00

| RT     | Peak Area % |
|--------|-------------|
| 6.928  | 0.23        |
| 7.501  | 0.00        |
| 10.347 | 0.16        |
| 10.891 | 99.60       |

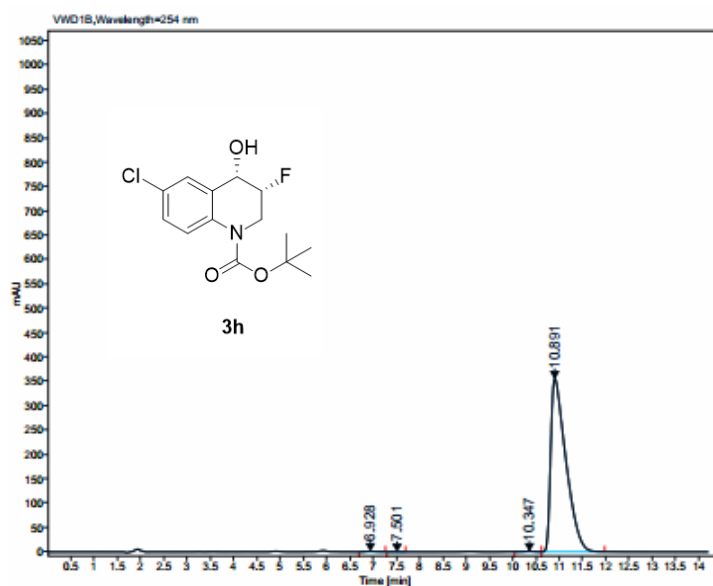

Sample Name

**RB rac  
NBocF Br  
tris**

Injection Acq Method Name IE - 100 bars - 2 mL.min-1 - 7% MeOH.amx

Injection Acquired Date 2021-12-07 17:47:22+01:00

| RT     | Peak Area % |
|--------|-------------|
| 7.718  | 10.82       |
| 11.074 | 44.61       |
| 11.958 | 44.57       |

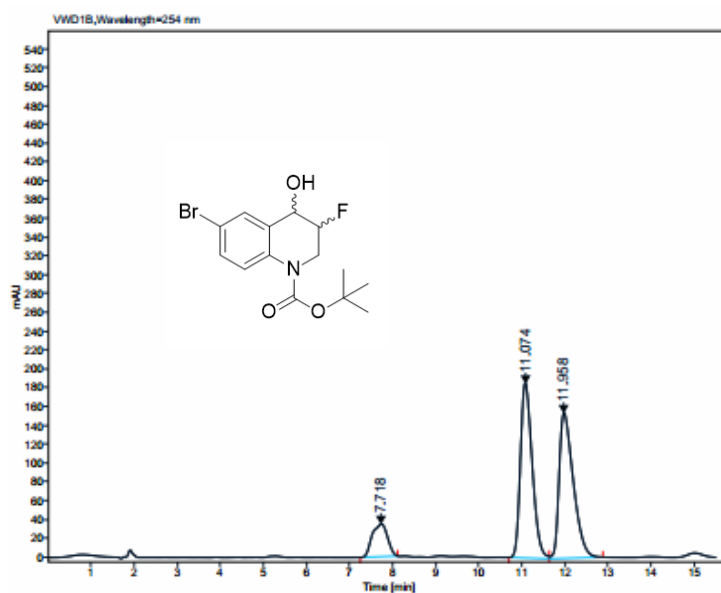

Sample Name

**RB ATH  
NBocF Br**

Injection Acq Method Name IE - 100 bars - 2 mL.min-1 - 7% MeOH.amx

Injection Acquired Date 2021-12-07 17:09:53+01:00

| RT     | Peak Area % |
|--------|-------------|
| 7.107  | 0.05        |
| 7.712  | 0.26        |
| 11.292 | 0.22        |
| 11.878 | 99.47       |

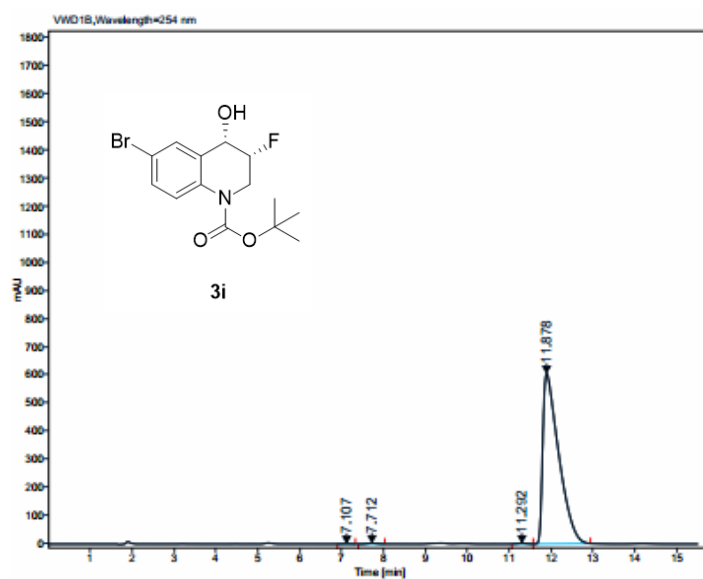

Sample Name

**RB rac  
NBocF I  
bis**

Injection Acq Method Name IE - 100 bars - 2 mL.min-1 - 7% MeOH.amx

Injection Acquired Date 2021-12-08 09:14:27+01:00

| RT     | Peak Area % |
|--------|-------------|
| 10.923 | 4.42        |
| 11.406 | 4.59        |
| 15.729 | 45.49       |
| 17.254 | 45.49       |

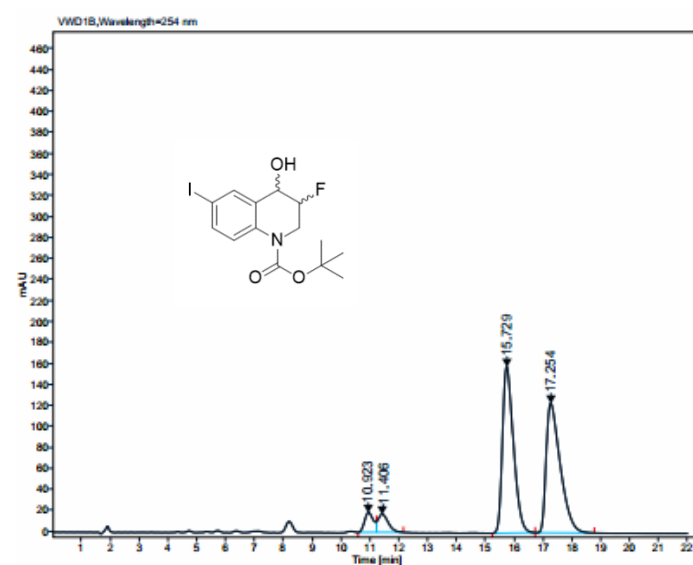

Sample Name

**RB ATH  
NBocF I**

Injection Acq Method Name IE - 100 bars - 2 mL.min-1 - 7% MeOH.amx

Injection Acquired Date 2021-12-08 09:42:09+01:00

| RT     | Peak Area % |
|--------|-------------|
| 10.488 | 0.02        |
| 11.285 | 0.40        |
| 15.814 | 0.22        |
| 16.690 | 99.35       |

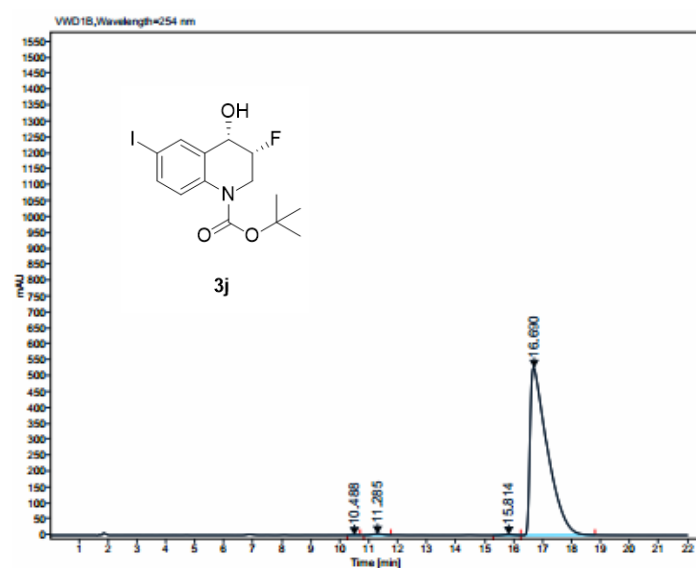

Supplement: s1 [file s1]
